# Supplementary material for: Arthropods as Vertebrate Predators: A Review of Global Patterns
Source: Preprints.org preprint supplement (doi:10.20944/preprints202002.0119.v1), 2020-02-10
Supplement: Supplementary file 2 [file supplementary]

Predator class,Predator order,Predator family,Prey class,Prey order,Prey family,region,citation,cited in
Arachnida,Amblypygi,Phrynidae,Reptilia,Squamata,Polychrotidae,Dominican Republic,"{de Armas, 1999 #1914}",
Arachnida,Amblypygi,Phrynidae,Amphibia,Anura,Leptodactylidae,Puerto Rico,"{Formanowicz Jr, 1981 #1802}","{de Armas, 2001 #1896}"
Arachnida,Amblypygi,Phrynidae,Amphibia,Anura,Centrolenidae,Panama,"{Hertz, 2010 #2295}",
Arachnida,Amblypygi,Phrynidae,Amphibia,Anura,Dendrobatidae,Costa Rica,"{Hovey, 2016 #2362}",
Arachnida,Amblypygi,Phrynidae,Reptilia,Squamata,Dactyloidae,French Guiana,"{Kok, 1998 #2244}",
Arachnida,Amblypygi,Phrynidae,Reptilia,Squamata,Sphaerodactylidae,Colombia,"{Moreno-Arias, 2016 #2361}",
Arachnida,Amblypygi,Phrynidae,Aves,Apodiformes,Trochilidae,virgin islands,"{Owen, 2006 #2534}",
Arachnida,Amblypygi,Phrynidae,Amphibia,Anura,Leptodactylidae,Puerto Rico,"{Reagan, 1996 #1911}","{Villanueva-Rivera, 2000 #1910}"
Arachnida,Amblypygi,Phrynidae,Amphibia,Anura,Leptodactylidae,Cuba,"{Schwartz, 1958 #1916}","{de Armas, 2001 #1896}"
Arachnida,Amblypygi,Phrynidae,Amphibia,Anura,Craugastoridae,Ecuador,"{Wizen, 2016 #2281}",
Arachnida,Araneae,Agelenidae,Amphibia,Urodela,Plethodontidae,United States,"{Durso, 2010 #2298}",
Arachnida,Araneae,Agelenidae,Mammalia,Rodentia,Muridae,UK,"{Felton, 1968 #1973}","{Nyffeler, 2018 #1729}"
Arachnida,Araneae,Agelenidae,Reptilia,Squamata,Colubridae,United States,"{Gudger, 1925 #1892}","{Mccormick, 1982 #648}"
Arachnida,Araneae,Araneidae,Reptilia,Squamata,Colubridae,United States,"{Anderson, 1930 #2448}","{Mccormick, 1982 #648}"
Arachnida,Araneae,Araneidae,Mammalia,Chiroptera,Vespertilionidae,India,"{BALIARSINGH, 2015 #1715}",
Arachnida,Araneae,Araneidae,Mammalia,Chiroptera,Unknown,unknown,"{Bristowe, 1939 #2444}","{Mccormick, 1982 #648}"
Arachnida,Araneae,Araneidae,Aves,Passeriformes,Estrildidae,Australia,"{Brooks, 2012 #1801}",
Arachnida,Araneae,Araneidae,Aves,Passeriformes,Maluridae,Australia,"{Brooks, 2012 #1801}",
Arachnida,Araneae,Araneidae,Aves,Passeriformes,Meliphagidae,Australia,"{Brooks, 2012 #1801}",
Arachnida,Araneae,Araneidae,Aves,Passeriformes,Meliphagidae,Australia,"{Brooks, 2012 #1801}",
Arachnida,Araneae,Araneidae,Aves,Apodiformes,Trochilidae,unknown,"{Brooks, 2012 #1801}",
Arachnida,Araneae,Araneidae,Aves,Apodiformes,Trochilidae,unknown,"{Brooks, 2012 #1801}",
Arachnida,Araneae,Araneidae,Aves,Apodiformes,Trochilidae,unknown,"{Brooks, 2012 #1801}",
Arachnida,Araneae,Araneidae,Reptilia,Squamata,Colubridae,United States,"{BURT, 1949 #2447}","{Mccormick, 1982 #648}"
Arachnida,Araneae,Araneidae,Mammalia,Chiroptera,Vespertilionidae,China,"{Cantor, 1842 #2554}","{Nyffeler, 2013 #1714}"
Arachnida,Araneae,Araneidae,Mammalia,Chiroptera,Vespertilionidae,China,"{Cantor, 1842 #2554}","{Nyffeler, 2013 #1714}"
Arachnida,Araneae,Araneidae,Reptilia,Squamata,Scincidae,United States,"{Chatfield, 2014 #2258}",
Arachnida,Araneae,Araneidae,Mammalia,Chiroptera,Hipposideridae,Australia,"{Churchill, 2008 #1862}","{Nyffeler, 2013 #1714}"
Arachnida,Araneae,Araneidae,Aves,Unknown,Unknown,Jamaica,"{Cockerell, 1894 #2442}","{Mccormick, 1982 #648}"
Arachnida,Araneae,Araneidae,Reptilia,Squamata,Scincidae,unknown,"{Cokendolpher, 1977 #2400}","{Schalk, 2018 #1732}"
Arachnida,Araneae,Araneidae,Reptilia,Squamata,Polychrotidae,Cuba,"{de Armas, 1987 #1915}","{de Armas, 2001 #1896}"
Arachnida,Araneae,Araneidae,Reptilia,Squamata,Polychrotidae,Cuba,"{de Armas, 1987 #1915}","{de Armas, 2001 #1896}"
Arachnida,Araneae,Araneidae,Reptilia,Squamata,Gekkonidae,Brazil,"{Diniz, 2011 #2402}","{Schalk, 2018 #1732}"
Arachnida,Araneae,Araneidae,Reptilia,Squamata,Gekkonidae,Sri Lanka,"{Disswanayake, 2016 #2282}",
Arachnida,Araneae,Araneidae,Reptilia,Squamata,Sphaerodactylidae,Costa Rica,"{Filipiak, 2012 #2319}",
Arachnida,Araneae,Araneidae,Amphibia,Anura,Centrolenidae,Costa Rica,"{Folt, 2017 #1790}",
Arachnida,Araneae,Araneidae,Amphibia,Anura,Craugastoridae,Costa Rica,"{Ganong, 2015 #1922}",
Arachnida,Araneae,Araneidae,Amphibia,Anura,Hylidae,unknown,"{Gudger, 1924 #2433}","{Mccormick, 1982 #648}"
Arachnida,Araneae,Araneidae,Aves,Passeriformes,Timaliidae,unknown,"{Gudger, 1925 #1892}","{Mccormick, 1982 #648}"
Arachnida,Araneae,Araneidae,Amphibia,Anura,Unknown,unknown,"{Gudger, 1925 #1892}","{Mccormick, 1982 #648}"
Arachnida,Araneae,Araneidae,Mammalia,Chiroptera,Vespertilionidae,Hong Kong,"{Hill, 1982 #2549}","{Nyffeler, 2013 #1714}"
Arachnida,Araneae,Araneidae,Mammalia,Chiroptera,Vespertilionidae,Papua New Guinea,"{Hill, 1984 #2550}","{Nyffeler, 2013 #1714}"
Arachnida,Araneae,Araneidae,Mammalia,Chiroptera,Unknown,China,"{Keeshaw, 1905 #2551}","{Nyffeler, 2013 #1714}"
Arachnida,Araneae,Araneidae,Amphibia,Anura,Hylidae,Brazil,"{Kirchmeyer, 2017 #1728}",
Arachnida,Araneae,Araneidae,Reptilia,Squamata,Gekkonidae,Hawaii,"{La Rivers, 1948 #2418}","{Schalk, 2018 #1732}"
Arachnida,Araneae,Araneidae,Reptilia,Squamata,Gekkonidae,Hong Kong,"{Lazell, 1995 #2248}",
Arachnida,Araneae,Araneidae,Mammalia,Chiroptera,Unknown,Australia,"{Le Souef, 1915 #2552}","{Nyffeler, 2013 #1714}"
Arachnida,Araneae,Araneidae,Mammalia,Chiroptera,Unknown,United States,"{Levi, 1970 #1864}","{Nyffeler, 2013 #1714}"
Arachnida,Araneae,Araneidae,Aves,Apodiformes,Trochilidae,Cuba,"{Levy, 1987 #1995}","{Brooks, 2012 #1801}"
Arachnida,Araneae,Araneidae,Aves,Apodiformes,Trochilidae,Cuba,"{Levy, 1987 #1995}","{Brooks, 2012 #1801}"
Arachnida,Araneae,Araneidae,Amphibia,Anura,Hylidae,United States,"{Lockley, 1990 #1758}",
Arachnida,Araneae,Araneidae,Aves,Passeriformes,Nectariniidae,Africa,"{Mann, 2010 #1998}","{Brooks, 2012 #1801}"
Arachnida,Araneae,Araneidae,Aves,Passeriformes,Passeridae,United States,"{McCook, 1889 #2443}","{Mccormick, 1982 #648}"
Arachnida,Araneae,Araneidae,Aves,Columbiformes,Columbidae,United States,"{McCook, 1889 #2443}","{Mccormick, 1982 #648}"
Arachnida,Araneae,Araneidae,Aves,Columbiformes,Columbidae,United States,"{McCook, 1889 #2443}","{Mccormick, 1982 #648}"
Arachnida,Araneae,Araneidae,Aves,Passeriformes,Monarchidae,United States,"{McCook, 1889 #2443}","{Mccormick, 1982 #648}"
Arachnida,Araneae,Araneidae,Aves,Passeriformes,Regulidae,United States,"{McCook, 1889 #2443}","{Mccormick, 1982 #648}"
Arachnida,Araneae,Araneidae,Aves,Apodiformes,Trochilidae,United States,"{McCook, 1889 #2443}","{Mccormick, 1982 #648}"
Arachnida,Araneae,Araneidae,Mammalia,Chiroptera,Unknown,United States,"{McCook, 1889 #2443}","{Mccormick, 1982 #648}"
Arachnida,Araneae,Araneidae,Aves,Passeriformes,Hirundinidae,Australia,"{McKeown, 1943 #1870}","{Mccormick, 1982 #648}"
Arachnida,Araneae,Araneidae,Aves,Passeriformes,Rhipiduridae,Australia,"{McKeown, 1943 #1870}","{Mccormick, 1982 #648}"
Arachnida,Araneae,Araneidae,Mammalia,Chiroptera,Unknown,Australia,"{McKeown, 1943 #1870}","{Mccormick, 1982 #648}"
Arachnida,Araneae,Araneidae,Aves,Passeriformes,Zosteropidae,Australia,"{McKeown, 1943 #1870}","{Mccormick, 1982 #648}"
Arachnida,Araneae,Araneidae,Aves,Passeriformes,Acanthizidae,Australia,"{McKeown, 1952 #1975}","{Mccormick, 1982 #648}"
Arachnida,Araneae,Araneidae,Aves,Passeriformes,Acanthizidae,Australia,"{McKeown, 1952 #1975}","{Mccormick, 1982 #648}"
Arachnida,Araneae,Araneidae,Aves,Passeriformes,Maluridae,Australia,"{McKeown, 1952 #1975}","{Mccormick, 1982 #648}"
Arachnida,Araneae,Araneidae,Aves,Passeriformes,Maluridae,Australia,"{McKeown, 1952 #1975}","{Mccormick, 1982 #648}"
Arachnida,Araneae,Araneidae,Aves,Passeriformes,Maluridae,Australia,"{McKeown, 1952 #1975}","{Mccormick, 1982 #648}"
Arachnida,Araneae,Araneidae,Aves,Passeriformes,Meliphagidae,Australia,"{McKeown, 1952 #1975}","{Mccormick, 1982 #648}"
Arachnida,Araneae,Araneidae,Aves,Passeriformes,Meliphagidae,Australia,"{McKeown, 1952 #1975}","{Mccormick, 1982 #648}"
Arachnida,Araneae,Araneidae,Aves,Passeriformes,Petroicidae,Australia,"{McKeown, 1952 #1975}","{Mccormick, 1982 #648}"
Arachnida,Araneae,Araneidae,Aves,Passeriformes,Sturnidae,Australia,"{McKeown, 1952 #1975}","{Mccormick, 1982 #648}"
Arachnida,Araneae,Araneidae,Aves,Unknown,Unknown,Australia,"{McKeown, 1952 #1975}","{Mccormick, 1982 #648}"
Arachnida,Araneae,Araneidae,Mammalia,Chiroptera,Vespertilionidae,Australia,"{McKeown, 1952 #1975}","{Mccormick, 1982 #648}"
Arachnida,Araneae,Araneidae,Mammalia,Chiroptera,Unknown,Australia,"{McKeown, 1952 #1975}","{Nyffeler, 2013 #1714}"
Arachnida,Araneae,Araneidae,Mammalia,Chiroptera,Unknown,Australia,"{McKeown, 1952 #1975}","{Nyffeler, 2013 #1714}"
Arachnida,Araneae,Araneidae,Reptilia,Squamata,Dactyloidae,United States,"{Mitchell, 2013 #2325}",
Arachnida,Araneae,Araneidae,Amphibia,Anura,Hylidae,Brazil,"{Muscat, 2014 #1686}",
Arachnida,Araneae,Araneidae,Mammalia,Chiroptera,Emballonuridae,Belize,"{Nyffeler, 2013 #1714}","{Nyffeler, 2013 #1714}"
Arachnida,Araneae,Araneidae,Mammalia,Chiroptera,Emballonuridae,Costa Rica,"{Nyffeler, 2013 #1714}","{Nyffeler, 2013 #1714}"
Arachnida,Araneae,Araneidae,Mammalia,Chiroptera,Emballonuridae,Costa Rica,"{Nyffeler, 2013 #1714}","{Nyffeler, 2013 #1714}"
Arachnida,Araneae,Araneidae,Mammalia,Chiroptera,Emballonuridae,Panama,"{Nyffeler, 2013 #1714}","{Nyffeler, 2013 #1714}"
Arachnida,Araneae,Araneidae,Mammalia,Chiroptera,Emballonuridae,Peru,"{Nyffeler, 2013 #1714}","{Nyffeler, 2013 #1714}"
Arachnida,Araneae,Araneidae,Mammalia,Chiroptera,Hipposideridae,Australia,"{Nyffeler, 2013 #1714}","{Nyffeler, 2013 #1714}"
Arachnida,Araneae,Araneidae,Mammalia,Chiroptera,Hipposideridae,Hong Kong,"{Nyffeler, 2013 #1714}","{Nyffeler, 2013 #1714}"
Arachnida,Araneae,Araneidae,Mammalia,Chiroptera,Phyllostimidae,Costa Rica,"{Nyffeler, 2013 #1714}","{Nyffeler, 2013 #1714}"
Arachnida,Araneae,Araneidae,Mammalia,Chiroptera,Rhinolophidae,Japan,"{Nyffeler, 2013 #1714}","{Nyffeler, 2013 #1714}"
Arachnida,Araneae,Araneidae,Mammalia,Chiroptera,Unknown,Belize,"{Nyffeler, 2013 #1714}","{Nyffeler, 2013 #1714}"
Arachnida,Araneae,Araneidae,Mammalia,Chiroptera,Unknown,Costa Rica,"{Nyffeler, 2013 #1714}","{Nyffeler, 2013 #1714}"
Arachnida,Araneae,Araneidae,Mammalia,Chiroptera,Unknown,Hong Kong,"{Nyffeler, 2013 #1714}","{Nyffeler, 2013 #1714}"
Arachnida,Araneae,Araneidae,Mammalia,Chiroptera,Unknown,Colombia,"{Nyffeler, 2013 #1714}","{Nyffeler, 2013 #1714}"
Arachnida,Araneae,Araneidae,Mammalia,Chiroptera,Unknown,Colombia,"{Nyffeler, 2013 #1714}","{Nyffeler, 2013 #1714}"
Arachnida,Araneae,Araneidae,Mammalia,Chiroptera,Unknown,Guatemala,"{Nyffeler, 2013 #1714}","{Nyffeler, 2013 #1714}"
Arachnida,Araneae,Araneidae,Mammalia,Chiroptera,Unknown,Vietnam,"{Nyffeler, 2013 #1714}","{Nyffeler, 2013 #1714}"
Arachnida,Araneae,Araneidae,Mammalia,Chiroptera,Vespertilionidae,Germany,"{Nyffeler, 2013 #1714}","{Nyffeler, 2013 #1714}"
Arachnida,Araneae,Araneidae,Mammalia,Chiroptera,Vespertilionidae,Eswatini,"{Nyffeler, 2013 #1714}","{Nyffeler, 2013 #1714}"
Arachnida,Araneae,Araneidae,Mammalia,Chiroptera,Vespertilionidae,Costa Rica,"{Nyffeler, 2013 #1714}","{Nyffeler, 2013 #1714}"
Arachnida,Araneae,Araneidae,Mammalia,Chiroptera,Vespertilionidae,Hong Kong,"{Nyffeler, 2013 #1714}","{Nyffeler, 2013 #1714}"
Arachnida,Araneae,Araneidae,Mammalia,Chiroptera,Vespertilionidae,Hong Kong,"{Nyffeler, 2013 #1714}","{Nyffeler, 2013 #1714}"
Arachnida,Araneae,Araneidae,Mammalia,Chiroptera,Unknown,Central America,"{Nyffeler, 2013 #1714}","{Nyffeler, 2013 #1714}"
Arachnida,Araneae,Araneidae,Mammalia,Chiroptera,Unknown,Hong Kong,"{Nyffeler, 2013 #1714}","{Nyffeler, 2013 #1714}"
Arachnida,Araneae,Araneidae,Aves,Passeriformes,Tyrannidae,Brazil,"{Peloso, 2007 #1678}",
Arachnida,Araneae,Araneidae,Aves,Passeriformes,Maluridae,Australia,"{Pratt, 1974 #1996}","{Brooks, 2012 #1801}"
Arachnida,Araneae,Araneidae,Aves,Coraciiformes,Alcedinidae,unknown,"{Rainbow, 1895 #2446}","{Mccormick, 1982 #648}"
Arachnida,Araneae,Araneidae,Aves,Passeriformes,Maluridae,Australia,"{Rainbow, 1895 #2446}","{Mccormick, 1982 #648}"
Arachnida,Araneae,Araneidae,Aves,Passeriformes,Sylviidae,Australia,"{Rainbow, 1895 #2446}","{Mccormick, 1982 #648}"
Arachnida,Araneae,Araneidae,Aves,Passeriformes,Sylviidae,Australia,"{Rainbow, 1895 #2446}","{Mccormick, 1982 #648}"
Arachnida,Araneae,Araneidae,Reptilia,Squamata,Gekkonidae,India,"{Ranade, 2015 #1893}",
Arachnida,Araneae,Araneidae,Aves,Passeriformes,Meliphagidae,Australia,"{Roberts, 1945 #2445}","{Mccormick, 1982 #648}"
Arachnida,Araneae,Araneidae,Mammalia,Chiroptera,Vespertilionidae,Panama,"{Robinson, 1971 #1841}","{Nyffeler, 2013 #1714}"
Arachnida,Araneae,Araneidae,Reptilia,Squamata,Colubridae,Philippines,"{Sarmiento, 2018 #1859}",
Arachnida,Araneae,Araneidae,Mammalia,Rodentia,Cricetidae,United States,"{Saunders, 1929 #2524}","{Nyffeler, 2018 #1729}"
Arachnida,Araneae,Araneidae,Amphibia,Anura,Hylidae,Brazil,"{Sena, 2019 #1664}",
Arachnida,Araneae,Araneidae,Mammalia,Chiroptera,Unknown,Sri Lanka,"{Sherriffs, 1934 #1861}","{Nyffeler, 2013 #1714}"
Arachnida,Araneae,Araneidae,Amphibia,Anura,Hylidae,Brazil,"{Souza, 2019 #2269}",
Arachnida,Araneae,Araneidae,Amphibia,Anura,Hylidae,unknown,"{Steehouder, 1992 #2121}","{Toledo, 2005 #336}"
Arachnida,Araneae,Araneidae,Mammalia,Chiroptera,Vespertilionidae,Australia,"{Threlfall, 2011 #2553}","{Nyffeler, 2013 #1714}"
Arachnida,Araneae,Araneidae,Mammalia,Chiroptera,Emballonuridae,Costa Rica,"{Timm, 2007 #1843}","{Nyffeler, 2013 #1714}"
Arachnida,Araneae,Araneidae,Reptilia,Squamata,Gekkonidae,Australia,"{Turner, 2018 #1797}",
Arachnida,Araneae,Araneidae,Aves,Apodiformes,Apodidae,India,"{Manchi, 2009 #2562}","{Walther, 2016 #1669}"
Arachnida,Araneae,Araneidae,Aves,Columbiformes,Columbidae,Oman,"{Walther, 2016 #1669}","{Walther, 2016 #1669}"
Arachnida,Araneae,Araneidae,Aves,Passeriformes,Monarchidae,India,"{AP., 1999 #2564}","{Walther, 2016 #1669}"
Arachnida,Araneae,Araneidae,Aves,Passeriformes,Muscicapidae,Malaysia,"{Walther, 2016 #1669}","{Walther, 2016 #1669}"
Arachnida,Araneae,Araneidae,Aves,Passeriformes,Paridae,Japan,"{Walther, 2016 #1669}","{Walther, 2016 #1669}"
Arachnida,Araneae,Araneidae,Aves,Passeriformes,Pycnonotidae,Taiwan,"{Walther, 2016 #1669}","{Walther, 2016 #1669}"
Arachnida,Araneae,Araneidae,Aves,Passeriformes,Zosteropidae,Japan,"{Walther, 2016 #1669}","{Walther, 2016 #1669}"
Arachnida,Araneae,Araneidae,Aves,Unknown,Unknown,Japan,"{Walther, 2016 #1669}","{Walther, 2016 #1669}"
Arachnida,Araneae,Araneidae,Aves,Passeriformes,Sylviidae,Taiwan,"{Walther, 2016 #1669}","{Walther, 2016 #1669}"
Arachnida,Araneae,Araneidae,Aves,Unknown,Unknown,Hong Kong,"{Walther, 2016 #1669}","{Walther, 2016 #1669}"
Arachnida,Araneae,Araneidae,Aves,Apodiformes,Trochilidae,Colombia,"{Ayazo, 2019 #2561}",
Arachnida,Araneae,Araneidae,Aves,Passeriformes,Cardinalidae,United States,"{Queller, 2019 #2560}",
Arachnida,Araneae,Araneidae,Mammalia,Chiroptera,Vespertilionidae,Panama,"{Wilson, 1971 #1863}","{Nyffeler, 2013 #1714}"
Arachnida,Araneae,Barychelidae,Reptilia,Squamata,Sphaerodactylidae,Colombia,"{Quintero-Angel, 2010 #2293}",
Arachnida,Araneae,Clubionidae,Amphibia,Anura,Centrolenidae,Ecuador,"{Almeida-Reinoso, 2012 #2327}",
Arachnida,Araneae,Clubionidae,Actinopterygii,Salmoniformes,Salmonidae,France,"{Berland, 1934 #1879}","{Mccormick, 1982 #648}"
Arachnida,Araneae,Corinnidae,Amphibia,Anura,Eleutherodactylidae,puerto rico,"{Daza, 2008 #2302}",
Arachnida,Araneae,Ctenidae,Amphibia,Anura,Hylidae,Costa Rica,"{Abarca, 2018 #2062}",
Arachnida,Araneae,Ctenidae,Amphibia,Anura,Aromobatidae,Colombia,"{Acevedo, 2018 #2064}",
Arachnida,Araneae,Ctenidae,Amphibia,Anura,Craugastoridae,Mexico,"{Aguilar-López, 2014 #2404}",
Arachnida,Araneae,Ctenidae,Reptilia,Squamata,Scincidae,Mexico,"{Aguilar-López, 2014 #2404}",
Arachnida,Araneae,Ctenidae,Reptilia,Squamata,Sphaerodactylidae,Brazil,"{Almeida, 2015 #2311}",
Arachnida,Araneae,Ctenidae,Amphibia,Anura,Leptodactylidae,Brazil,"{Amaral, 2015 #1687}",
Arachnida,Araneae,Ctenidae,Amphibia,Anura,Craugastoridae,Brazil,"{Assis, 2017 #2267}",
Arachnida,Araneae,Ctenidae,Amphibia,Anura,Leptodactylidae,Trinidad and Tobago,"{Auguste, 2018 #1712}",
Arachnida,Araneae,Ctenidae,Amphibia,Anura,Arthroleptidae,Cameroon,"{Babangenge, 2019 #1731}","{Babangenge, 2019 #1731}"
Arachnida,Araneae,Ctenidae,Amphibia,Anura,Leptodactylidae,Brazil,"{Barbo, 2009 #2142}",
Arachnida,Araneae,Ctenidae,Amphibia,Anura,Arthroleptidae,Cameroon,"{Barej, 2009 #1799}","{Babangenge, 2019 #1731}"
Arachnida,Araneae,Ctenidae,Amphibia,Anura,Hylidae,Brazil,"{Bocchiglieri, 2010 #2201}",
Arachnida,Araneae,Ctenidae,Amphibia,Anura,Hylidae,Brazil,"{Bovo, 2013 #2331}",
Arachnida,Araneae,Ctenidae,Amphibia,Anura,Hylidae,Brazil,"{Brasileiro, 2006 #1965}",
Arachnida,Araneae,Ctenidae,Mammalia,Rodentia,Muridae,Brazil,"{Bücherl, 1971 #1976}","{Nyffeler, 2018 #1729}"
Arachnida,Araneae,Ctenidae,Amphibia,Anura,Leptodactylidae,Paraguay,"{Bueno-Villafañe, 2018 #1981}",
Arachnida,Araneae,Ctenidae,Amphibia,Anura,Hylidae,Brazil,"{Caldart, 2011 #1682}",
Arachnida,Araneae,Ctenidae,Amphibia,Anura,Leptodactylidae,Mexico,"{Calzada-Arciniega, 2014 #2134}",
Arachnida,Araneae,Ctenidae,Amphibia,Anura,Leptodactylidae,Colombia,"{Carmona, 2017 #2275}",
Arachnida,Araneae,Ctenidae,Amphibia,Anura,Leptodactylidae,Peru,"{Champagne, 2015 #2329}",
Arachnida,Araneae,Ctenidae,Amphibia,Anura,Hylidae,Brazil,"{Cicchi, 2010 #2050}",
Arachnida,Araneae,Ctenidae,Amphibia,Anura,Leptodactylidae,Brazil,"{Costa, 2014 #2320}",
Arachnida,Araneae,Ctenidae,Amphibia,Anura,Hylidae,Brazil,"{Costa-Campos,  #1698}",
Arachnida,Araneae,Ctenidae,Amphibia,Anura,Dendrobatidae,Brazil,"{Da Costa, 2006 #2249}",
Arachnida,Araneae,Ctenidae,Amphibia,Anura,Dendrobatidae,Brazil,"{Da Costa, 2006 #2249}",
Arachnida,Araneae,Ctenidae,Amphibia,Anura,Hylidae,Brazil,"{Da Costa, 2006 #2249}",
Arachnida,Araneae,Ctenidae,Amphibia,Anura,Hylidae,Brazil,"{Da Costa, 2006 #2249}",
Arachnida,Araneae,Ctenidae,Amphibia,Anura,Leptodactylidae,Brazil,"{Da Costa, 2006 #2249}",
Arachnida,Araneae,Ctenidae,Amphibia,Anura,Hylidae,Brazil,"{Da Fonte, 2013 #2332}",
Arachnida,Araneae,Ctenidae,Amphibia,Anura,Leptodactylidae,Brazil,"{Da Silva, 2015 #2310}",
Arachnida,Araneae,Ctenidae,Amphibia,Anura,Aromobatidae,Brazil,"{De Carvalho, 2013 #2322}",
Arachnida,Araneae,Ctenidae,Reptilia,Squamata,Gymnophthalmidae,French Guiana,"{De Massary, 1999 #2254}",
Arachnida,Araneae,Ctenidae,Amphibia,Anura,Leptodactylidae,Brazil,"{De Mira-Mendes, 2017 #2276}",
Arachnida,Araneae,Ctenidae,Actinopterygii,Cichliformes,Cichlidae,Trinidad and Tobago,"{Deacon, 2015 #1672}",
Arachnida,Araneae,Ctenidae,Amphibia,Anura,Brachycephalidae,Brazil,"{De-Carvalho, 2010 #1959}",
Arachnida,Araneae,Ctenidae,Amphibia,Anura,Hylidae,Costa Rica,"{Dehling, 2007 #1925}",
Arachnida,Araneae,Ctenidae,Amphibia,Anura,Craugastoridae,Costa Rica,"{Donnelly, 1994 #1926}",
Arachnida,Araneae,Ctenidae,Amphibia,Anura,Hylidae,Costa Rica,"{Donnelly, 1994 #1926}",
Arachnida,Araneae,Ctenidae,Amphibia,Anura,Hylidae,Costa Rica,"{Donnelly, 1994 #1926}",
Arachnida,Araneae,Ctenidae,Amphibia,Anura,Leptodactylidae,Brazil,"{Duryea, 2008 #2305}",
Arachnida,Araneae,Ctenidae,Amphibia,Anura,Hylidae,Costa Rica,"{Ervin, 2007 #1923}",
Arachnida,Araneae,Ctenidae,Amphibia,Anura,Hylidae,Costa Rica,"{Ervin, 2007 #1923}",
Arachnida,Araneae,Ctenidae,Amphibia,Anura,Leptodactylidae,Brazil,"{Fadel, 2019 #1643}",
Arachnida,Araneae,Ctenidae,Amphibia,Anura,Hylidae,Brazil,"{Fadel, 2019 #2200}",
Arachnida,Araneae,Ctenidae,Amphibia,Anura,Hylidae,Brazil,"{Foerster, 2017 #1693}",
Arachnida,Araneae,Ctenidae,Amphibia,Anura,Hylidae,Brazil,"{Folly, 2017 #1668}",
Arachnida,Araneae,Ctenidae,Amphibia,Anura,Centrolenidae,Costa Rica,"{Folt, 2017 #1790}",
Arachnida,Araneae,Ctenidae,Amphibia,Anura,Centrolenidae,Costa Rica,"{Folt, 2017 #1790}",
Arachnida,Araneae,Ctenidae,Reptilia,Squamata,Dactyloidae,Costa Rica,"{Folt, 2017 #1790}",
Arachnida,Araneae,Ctenidae,Amphibia,Anura,Ranidae,Costa Rica,"{Folt, 2017 #1790}",
Arachnida,Araneae,Ctenidae,Amphibia,Anura,Eleutherodactylidae,Cuba,"{Fong G., 2012 #2333}",
Arachnida,Araneae,Ctenidae,Reptilia,Squamata,Dactyloidae,Cuba,"{Fonseca, 2014 #1706}",
Arachnida,Araneae,Ctenidae,Amphibia,Anura,Leptodactylidae,Puerto Rico,"{Formanowicz Jr, 1981 #1802}","{Menin, 2005 #1777}"
Arachnida,Araneae,Ctenidae,Amphibia,Anura,Hylidae,Brazil,"{Freitas, 2010 #2049}",
Arachnida,Araneae,Ctenidae,Amphibia,Anura,Leptodactylidae,Mexico,"{Garcia-Vinalay, 2017 #2135}",
Arachnida,Araneae,Ctenidae,Reptilia,Squamata,Leiosauridae,Brazil,"{Gomides, 2010 #2296}",
Arachnida,Araneae,Ctenidae,Reptilia,Squamata,Leiosauridae,Brazil,"{Gomides, 2010 #2296}",
Arachnida,Araneae,Ctenidae,Amphibia,Anura,Leptodactylidae,Brazil,"{Guerra, 2018 #2340}",
Arachnida,Araneae,Ctenidae,Reptilia,Squamata,Dactyloidae,Costa Rica,"{Guyer, 1988 #1930}",
Arachnida,Araneae,Ctenidae,Reptilia,Squamata,Sphaerodactylidae,Brazil,"{Hernández-Ruz, 2014 #2321}",
Arachnida,Araneae,Ctenidae,Actinopterygii,Unknown,Unknown,Brazil,"{Höfer, 2000 #1871}","{Nyffeler, 2014 #1781}"
Arachnida,Araneae,Ctenidae,Amphibia,Anura,Hylidae,Bolivia,"{Jansen, 2008 #2301}",
Arachnida,Araneae,Ctenidae,Reptilia,Squamata,Gekkonidae,Brazil,"{Lanschi, 2012 #2328}",
Arachnida,Araneae,Ctenidae,Actinopterygii,Cyprinodontiformes,Poeciliidae,Costa Rica,"{Lapinski, 2013 #1878}","{Nyffeler, 2014 #1781}"
Arachnida,Araneae,Ctenidae,Amphibia,Anura,Hylidae,Brazil,"{Lima, 2006 #1961}","{Moura, 2011 #1719}"
Arachnida,Araneae,Ctenidae,Amphibia,Anura,Leiuperidae,Brazil,"{Maffei, 2010 #1717}",
Arachnida,Araneae,Ctenidae,Amphibia,Anura,Hylidae,Brazil,"{Maffei, 2014 #1647}",
Arachnida,Araneae,Ctenidae,Reptilia,Squamata,Polychrotidae,Colombia,"{Medina-Rangel, 2013 #2316}",
Arachnida,Araneae,Ctenidae,Amphibia,Anura,Hylidae,Brazil,"{Melo-Sampaio, 2012 #2337}",
Arachnida,Araneae,Ctenidae,Amphibia,Anura,Bufonidae,Brazil,"{Menin, 2005 #1777}",
Arachnida,Araneae,Ctenidae,Amphibia,Anura,Bufonidae,Brazil,"{Menin, 2005 #1777}",
Arachnida,Araneae,Ctenidae,Amphibia,Anura,Dendrobatidae,Brazil,"{Menin, 2005 #1777}",
Arachnida,Araneae,Ctenidae,Amphibia,Anura,Hylidae,Brazil,"{Menin, 2005 #1777}",
Arachnida,Araneae,Ctenidae,Amphibia,Anura,Hylidae,Brazil,"{Menin, 2005 #1777}",
Arachnida,Araneae,Ctenidae,Amphibia,Anura,Hylidae,Brazil,"{Menin, 2005 #1777}",
Arachnida,Araneae,Ctenidae,Amphibia,Anura,Hylidae,Brazil,"{Menin, 2005 #1777}",
Arachnida,Araneae,Ctenidae,Amphibia,Anura,Leptodactylidae,Brazil,"{Menin, 2005 #1777}",
Arachnida,Araneae,Ctenidae,Amphibia,Anura,Leptodactylidae,Brazil,"{Menin, 2005 #1777}",
Arachnida,Araneae,Ctenidae,Amphibia,Anura,Leptodactylidae,Brazil,"{Menin, 2005 #1777}",
Arachnida,Araneae,Ctenidae,Amphibia,Anura,Microhylidae,Brazil,"{Menin, 2005 #1777}",
Arachnida,Araneae,Ctenidae,Amphibia,Anura,Hylidae,Brazil,"{Moura, 2011 #1719}",
Arachnida,Araneae,Ctenidae,Amphibia,Anura,Leptodactylidae,Cuba,"{Novo, 1985 #1917}","{de Armas, 2001 #1896}"
Arachnida,Araneae,Ctenidae,Actinopterygii,Characiformes,Curimatidae,Ecuador,"{Nyffeler, 2014 #1781}","{Nyffeler, 2014 #1781}"
Arachnida,Araneae,Ctenidae,Actinopterygii,Characiformes,Unknown,Ecuador,"{Nyffeler, 2014 #1781}","{Nyffeler, 2014 #1781}"
Arachnida,Araneae,Ctenidae,Actinopterygii,Characiformes,Unknown,Ecuador,"{Nyffeler, 2014 #1781}","{Nyffeler, 2014 #1781}"
Arachnida,Araneae,Ctenidae,Actinopterygii,Characiformes,Unknown,Ecuador,"{Nyffeler, 2014 #1781}","{Nyffeler, 2014 #1781}"
Arachnida,Araneae,Ctenidae,Actinopterygii,Unknown,Unknown,Ecuador,"{Nyffeler, 2014 #1781}","{Nyffeler, 2014 #1781}"
Arachnida,Araneae,Ctenidae,Actinopterygii,Siluriformes,Pimelodidae,Ecuador,"{Nyffeler, 2014 #1781}","{Nyffeler, 2014 #1781}"
Arachnida,Araneae,Ctenidae,Actinopterygii,Characiformes,Unknown,Peru,"{Nyffeler, 2014 #1781}","{Nyffeler, 2014 #1781}"
Arachnida,Araneae,Ctenidae,Amphibia,Anura,Hylidae,Brazil,"{Pacheco, 2016 #1833}",
Arachnida,Araneae,Ctenidae,Amphibia,Anura,Bufonidae,Brazil,"{Pazin, 2006 #1960}",
Arachnida,Araneae,Ctenidae,Amphibia,Anura,Leptodactylidae,Brazil,"{Pedrozo, 2017 #1645}",
Arachnida,Araneae,Ctenidae,Reptilia,Squamata,Gymnophthalmidae,Brazil,"{Pereira-Ribeiro, 2017 #2277}",
Arachnida,Araneae,Ctenidae,Reptilia,Squamata,Colubridae,Brazil,"{Pinto, 2017 #2280}",
Arachnida,Araneae,Ctenidae,Amphibia,Anura,Eleutherodactylidae,Brazil,"{Pontes, 2009 #2055}",
Arachnida,Araneae,Ctenidae,Amphibia,Anura,Hylidae,Brazil,"{Prado, 2003 #1963}","{Menin, 2005 #1777}"
Arachnida,Araneae,Ctenidae,Amphibia,Anura,Hylidae,Colombia,"{Ramírez-Castaño, 2014 #2330}",
Arachnida,Araneae,Ctenidae,Amphibia,Anura,Hylidae,Brazil,"{Rodrigues, 2007 #1962}",
Arachnida,Araneae,Ctenidae,Reptilia,Squamata,Gymnophthalmidae,Peru,"{Rudolf von May, 2019 #252}",
Arachnida,Araneae,Ctenidae,Amphibia,Anura,Hylidae,Peru,"{Rudolf von May, 2019 #252}",
Arachnida,Araneae,Ctenidae,Amphibia,Anura,Hylidae,Peru,"{Rudolf von May, 2019 #252}",
Arachnida,Araneae,Ctenidae,Amphibia,Anura,Hylidae,Peru,"{Rudolf von May, 2019 #252}",
Arachnida,Araneae,Ctenidae,Amphibia,Anura,Hylidae,Peru,"{Rudolf von May, 2019 #252}",
Arachnida,Araneae,Ctenidae,Amphibia,Anura,Leptodactylidae,Peru,"{Rudolf von May, 2019 #252}",
Arachnida,Araneae,Ctenidae,Amphibia,Anura,Microhylidae,Peru,"{Rudolf von May, 2019 #252}",
Arachnida,Araneae,Ctenidae,Amphibia,Anura,Microhylidae,Peru,"{Rudolf von May, 2019 #252}",
Arachnida,Araneae,Ctenidae,Amphibia,Anura,Hylidae,Peru,"{Salas, 2019 #1663}",
Arachnida,Araneae,Ctenidae,Amphibia,Anura,Microhylidae,Colombia,"{Salcedo-Rivera, 2018 #1700}",
Arachnida,Araneae,Ctenidae,Amphibia,Anura,Hylidae,Brazil,"{Sanches, 2018 #2065}",
Arachnida,Araneae,Ctenidae,Amphibia,Anura,Hylidae,Brazil,"{Santana, 2009 #1649}",
Arachnida,Araneae,Ctenidae,Amphibia,Anura,Bufonidae,Brazil,"{Silva-Silva, 2013 #2336}",
Arachnida,Araneae,Ctenidae,Reptilia,Squamata,Colubridae,Peru,"{Sorokin, 2017 #2279}",
Arachnida,Araneae,Ctenidae,Amphibia,Anura,Hylidae,Costa Rica,"{Szelistowski, 1985 #1931}","{Toledo, 2005 #336}"
Arachnida,Araneae,Ctenidae,Amphibia,Anura,Hylidae,Costa Rica,"{Szelistowski, 1985 #1931}","{Toledo, 2005 #336}"
Arachnida,Araneae,Ctenidae,Amphibia,Anura,Leptodactylidae,Costa Rica,"{Szelistowski, 1985 #1931}","{Toledo, 2005 #336}"
Arachnida,Araneae,Ctenidae,Amphibia,Anura,Leptodactylidae,Brazil,"{Tavares-Pinheiro, 2019 #2266}",
Arachnida,Araneae,Ctenidae,Amphibia,Anura,Craugastoridae,Costa Rica,"{Ugarte, 2007 #1927}",
Arachnida,Araneae,Ctenidae,Amphibia,Anura,Hylidae,Mexico,"{Vásquez Cruz, 2017 #2133}",
Arachnida,Araneae,Ctenidae,Reptilia,Squamata,Gymnophthalmidae,Brazil,"{WALDEZ, 2006 #1964}","{Schalk, 2018 #1732}"
Arachnida,Araneae,Ctenidae,Amphibia,Anura,Bufonidae,Trinidad and Tobago,"{White, 2015 #1685}",
Arachnida,Araneae,Ctenidae,Amphibia,Anura,Hylidae,Brazil,"{Zornosa-Torres, 2019 #2262}",
Arachnida,Araneae,Ctenidae,Amphibia,Anura,Hylidae,Costa Rica,"{Zumbado-Ulate, 2009 #1921}",
Arachnida,Araneae,Ctenizidae,Amphibia,Anura,Myobatrachidae,Australia,"{Butler, 1959 #2110}","{Mccormick, 1982 #648}"
Arachnida,Araneae,Ctenizidae,Amphibia,Anura,Myobatrachidae,Australia,"{Butler, 1959 #2110}","{Toledo, 2005 #336}"
Arachnida,Araneae,Ctenizidae,Aves,Passeriformes,Meliphagidae,Australia,"{McKeown, 1952 #1975}","{Mccormick, 1982 #648}"
Arachnida,Araneae,Ctenizidae,Amphibia,Anura,Leptodactylidae,Puerto Rico,"{Steward, 1996 #1912}","{Villanueva-Rivera, 2000 #1910}"
Arachnida,Araneae,Cyrtaucheniidae,Aves,Charadriidae,Charadriidae,United States,"{Wehtje, 2007 #1828}",
Arachnida,Araneae,Desidae,Actinopterygii,Unknown,Unknown,unknown,"{Pocock, 1902 #2484}","{Mccormick, 1982 #648}"
Arachnida,Araneae,Dipluridae,Aves,Galliformes,Phasianidae,United States,"{Kaston, 1965 #1974}","{Mccormick, 1982 #648}"
Arachnida,Araneae,Dipluridae,Aves,Galliformes,Phasianidae,United States,"{Kaston, 1965 #1974}","{Mccormick, 1982 #648}"
Arachnida,Araneae,Dipluridae,Amphibia,Anura,Hylidae,Australia,"{McKeown, 1952 #1975}","{Mccormick, 1982 #648}"
Arachnida,Araneae,Gnaphosidae,Amphibia,Anura,Rhacophoridae,India,"{Gopi Sundar, 1998 #1825}",
Arachnida,Araneae,Liocranidae,Actinopterygii,Salmoniformes,Salmonidae,France,"{Berland, 1934 #1879}?????","{Nyffeler, 2014 #1781}"
Arachnida,Araneae,Lycosidae,Amphibia,Anura,Hylidae,Brazil,"{Abegg, 2014 #1688}",
Arachnida,Araneae,Lycosidae,Amphibia,Anura,Bufonidae,Brazil,"{Almeida, 2010 #2016}",
Arachnida,Araneae,Lycosidae,Amphibia,Anura,Hylidae,Peru,"{Aucone, 2002 #2109}","{Menin, 2005 #1777}"
Arachnida,Araneae,Lycosidae,Actinopterygii,Unknown,Unknown,India,"{Bhatnagar, 1970 #2458}","{Mccormick, 1982 #648}"
Arachnida,Araneae,Lycosidae,Actinopterygii,Perciformes,Elassomatidae,India,"{Bhattacharjee, 1931 #1883}","{Nyffeler, 2014 #1781}"
Arachnida,Araneae,Lycosidae,Actinopterygii,Unknown,Unknown,India,"{Bhattacharya, 1936 #2459}","{Mccormick, 1982 #648}"
Arachnida,Araneae,Lycosidae,Amphibia,Anura,Hylidae,United States,"{Blackburn, 2002 #2132}","{Toledo, 2005 #336}"
Arachnida,Araneae,Lycosidae,Reptilia,Squamata,Tropiduridae,Brazil,"{Bocchiglieri, 2010 #2053}",
Arachnida,Araneae,Lycosidae,Amphibia,Anura,Telmatobiidae,Argentina,"{Brunetti, 2008 #2303}",
Arachnida,Araneae,Lycosidae,Reptilia,Squamata,Dactyloidae,United States,"{Corey, 1988 #1710}",
Arachnida,Araneae,Lycosidae,Amphibia,Anura,Leptodactylidae,Brazil,"{de Assis,  #1707}",
Arachnida,Araneae,Lycosidae,Amphibia,Anura,Leptodactylidae,Brazil,"{de Oliveira, 2010 #2299}",
Arachnida,Araneae,Lycosidae,Amphibia,Anura,Hylidae,Brazil,"{Del-Grande, 1997 #2139}","{Toledo, 2005 #336}"
Arachnida,Araneae,Lycosidae,Amphibia,Anura,Hylidae,Brazil,"{Folly, 2014 #2312}",
Arachnida,Araneae,Lycosidae,Reptilia,Squamata,Teiidae,Argentina,"{Galdeano, 2017 #2274}",
Arachnida,Araneae,Lycosidae,Amphibia,Anura,Leptodactylidae,Morocco,"{García-Muñoz, 2011 #2287}",
Arachnida,Araneae,Lycosidae,Amphibia,Anura,Hylidae,Brazil,"{Garda, 2007 #1938}","{Landgref Filho, 2019 #1624}"
Arachnida,Araneae,Lycosidae,Amphibia,Anura,Unknown,unknown,"{Gudger, 1922 #1891}","{Mccormick, 1982 #648}"
Arachnida,Araneae,Lycosidae,Reptilia,Squamata,Xantusiidae,Mexico,"{Guzman, 2007 #2401}","{Schalk, 2018 #1732}"
Arachnida,Araneae,Lycosidae,Reptilia,Squamata,Scincidae,United States,"{Hampton, 2004 #2260}",
Arachnida,Araneae,Lycosidae,Amphibia,Anura,Hylidae,United States,"{Jeffery, 2004 #1968}",
Arachnida,Araneae,Lycosidae,Amphibia,Anura,Leptodactylidae,Uruguay,"{Kacevas, 2019 #1665}",
Arachnida,Araneae,Lycosidae,Reptilia,Squamata,Diplodactylidae,Australia,"{Kluge, 1967 #2512}","{Bauer, 1990 #2196}"
Arachnida,Araneae,Lycosidae,Reptilia,Squamata,Gekkonidae,Brazil,"{Koski, 2013 #2315}",
Arachnida,Araneae,Lycosidae,Reptilia,Squamata,Gymnophthalmidae,Brazil,"{Maffei, 2010 #1717}",
Arachnida,Araneae,Lycosidae,Amphibia,Anura,Leptodactylidae,Brazil,"{Massao M. Sugai, 2012 #2318}",
Arachnida,Araneae,Lycosidae,Amphibia,Anura,Leptodactylidae,unknown,"{Mccormick, 1982 #648}","{Mccormick, 1982 #648}"
Arachnida,Araneae,Lycosidae,Amphibia,Anura,Ranidae,United States,"{Neill, 1948 #2115}","{Toledo, 2005 #336}"
Arachnida,Araneae,Lycosidae,Amphibia,Anura,Hylidae,Brazil,"{Oliveira, 2010 #1722}",
Arachnida,Araneae,Lycosidae,Amphibia,Anura,Hylidae,Australia,"{Raven, 1990 #1795}","{Toledo, 2005 #336}"
Arachnida,Araneae,Lycosidae,Amphibia,Anura,Dicroglossidae,India,"{Sharma, 1977 #2470}","{Mccormick, 1982 #648}"
Arachnida,Araneae,Lycosidae,Amphibia,Anura,Leptodactylidae,Brazil,"{Toledo, 2005 #336}","{Toledo, 2005 #336}"
Arachnida,Araneae,Lycosidae,Amphibia,Anura,Hylidae,Uruguay,"{Villanova, 2015 #2308}",
Arachnida,Araneae,Lycosidae,Amphibia,Anura,Hylidae,Uruguay,"{Villanova, 2015 #2308}",
Arachnida,Araneae,Lycosidae,Reptilia,Squamata,Phrynosomatidae,United States,"{Whiting, 1991 #2033}",
Arachnida,Araneae,Lycosidae,Reptilia,Squamata,Teiidae,United States,"{Whiting, 1991 #2033}",
Arachnida,Araneae,Lycosidae,Amphibia,Anura,Hylidae,United States,"{Youngquist, 2015 #1679}",
Arachnida,Araneae,Pholcidae,Reptilia,Squamata,Gekkonidae,Switzerland,"{Ackermann, 2012 #1658}",
Arachnida,Araneae,Pisauridae,Actinopterygii,Unknown,Unknown,South Africa,"{Abraham, 1923 #1966}","{Mccormick, 1982 #648}"
Arachnida,Araneae,Pisauridae,Actinopterygii,Perciformes,Elassomatidae,United States,"{Adams, 1927 #1873}","{Nyffeler, 2014 #1781}"
Arachnida,Araneae,Pisauridae,Actinopterygii,Perciformes,Elassomatidae,United States,"{Adams, 1927 #1873}","{Nyffeler, 2014 #1781}"
Arachnida,Araneae,Pisauridae,Actinopterygii,Perciformes,Elassomatidae,United States,"{Adams, 1927 #1873}","{Nyffeler, 2014 #1781}"
Arachnida,Araneae,Pisauridae,Actinopterygii,Perciformes,Elassomatidae,United States,"{Adams, 1927 #1873}","{Nyffeler, 2014 #1781}"
Arachnida,Araneae,Pisauridae,Actinopterygii,Perciformes,Elassomatidae,United States,"{Adams, 1927 #1873}","{Nyffeler, 2014 #1781}"
Arachnida,Araneae,Pisauridae,Actinopterygii,Perciformes,Elassomatidae,United States,"{Adams, 1927 #1873}","{Nyffeler, 2014 #1781}"
Arachnida,Araneae,Pisauridae,Actinopterygii,Perciformes,Elassomatidae,United States,"{Adams, 1927 #1873}","{Nyffeler, 2014 #1781}"
Arachnida,Araneae,Pisauridae,Actinopterygii,Perciformes,Elassomatidae,United States,"{Adams, 1927 #1873}","{Nyffeler, 2014 #1781}"
Arachnida,Araneae,Pisauridae,Amphibia,Anura,Hylidae,Peru,"{Arrivillaga, 2019 #1982}",
Arachnida,Araneae,Pisauridae,Amphibia,Anura,Ranidae,Japan,"{Baba, 2019 #1619}",
Arachnida,Araneae,Pisauridae,Amphibia,Anura,Ranidae,Japan,"{Baba, 2019 #1619}",
Arachnida,Araneae,Pisauridae,Amphibia,Anura,Ranidae,Japan,"{Baba, 2019 #1619}",
Arachnida,Araneae,Pisauridae,Amphibia,Anura,Ranidae,Japan,"{Baba, 2019 #1619}",
Arachnida,Araneae,Pisauridae,Amphibia,Anura,Ranidae,Japan,"{Baba, 2019 #1619}",
Arachnida,Araneae,Pisauridae,Amphibia,Anura,Hyperoliidae,Congo,"{Babangenge, 2019 #1731}","{Babangenge, 2019 #1731}"
Arachnida,Araneae,Pisauridae,Amphibia,Anura,Hyperoliidae,Ghana,"{Babangenge, 2019 #1731}","{Babangenge, 2019 #1731}"
Arachnida,Araneae,Pisauridae,Amphibia,Anura,Hyperoliidae,Côte d'Ivoire,"{Babangenge, 2019 #1731}","{Babangenge, 2019 #1731}"
Arachnida,Araneae,Pisauridae,Amphibia,Anura,Hyperoliidae,Côte d'Ivoire,"{Babangenge, 2019 #1731}","{Babangenge, 2019 #1731}"
Arachnida,Araneae,Pisauridae,Amphibia,Anura,Hyperoliidae,Kenya,"{Babangenge, 2019 #1731}","{Babangenge, 2019 #1731}"
Arachnida,Araneae,Pisauridae,Amphibia,Anura,Hyperoliidae,Kenya,"{Babangenge, 2019 #1731}","{Babangenge, 2019 #1731}"
Arachnida,Araneae,Pisauridae,Amphibia,Anura,Hyperoliidae,Madagascar,"{Babangenge, 2019 #1731}","{Babangenge, 2019 #1731}"
Arachnida,Araneae,Pisauridae,Amphibia,Anura,Hyperoliidae,Mozambique,"{Babangenge, 2019 #1731}","{Babangenge, 2019 #1731}"
Arachnida,Araneae,Pisauridae,Amphibia,Anura,Hyperoliidae,Côte d'Ivoire,"{Babangenge, 2019 #1731}","{Babangenge, 2019 #1731}"
Arachnida,Araneae,Pisauridae,Amphibia,Anura,Pipidae,Africa,"{Babangenge, 2019 #1731}","{Babangenge, 2019 #1731}"
Arachnida,Araneae,Pisauridae,Amphibia,Anura,Pipidae,Gabon,"{Babangenge, 2019 #1731}","{Babangenge, 2019 #1731}"
Arachnida,Araneae,Pisauridae,Amphibia,Anura,Hylidae,Brazil,"{Baracho, 2014 #1684}",
Arachnida,Araneae,Pisauridae,Actinopterygii,Siluriformes,Unknown,unknown,"{Barbour, 1921 #1881}","{Mccormick, 1982 #648}"
Arachnida,Araneae,Pisauridae,Actinopterygii,Cyprinodontiformes,Poeciliidae,United States,"{Barbour, 1921 #1881}","{Nyffeler, 2014 #1781}"
Arachnida,Araneae,Pisauridae,Actinopterygii,Cyprinodontiformes,Poeciliidae,United States,"{Barbour, 1921 #1881}","{Nyffeler, 2014 #1781}"
Arachnida,Araneae,Pisauridae,Amphibia,Anura,Hylidae,Brazil,"{Bastos, 1994 #1792}","{Menin, 2005 #1777}"
Arachnida,Araneae,Pisauridae,Amphibia,Anura,Hylidae,Brazil,"{Bernarde, 1999 #1793}","{Menin, 2005 #1777}"
Arachnida,Araneae,Pisauridae,Amphibia,Anura,Hylidae,Brazil,"{Bernarde, 1999 #1793}","{Menin, 2005 #1777}"
Arachnida,Araneae,Pisauridae,Amphibia,Anura,Hylidae,Brazil,"{Bernarde, 1999 #1793}","{Menin, 2005 #1777}"
Arachnida,Araneae,Pisauridae,Amphibia,Anura,Hylidae,Brazil,"{Bovo, 2014 #1721}",
Arachnida,Araneae,Pisauridae,Amphibia,Anura,Hylidae,Brazil,"{Bovo, 2014 #1721}",
Arachnida,Araneae,Pisauridae,Amphibia,Anura,Pipidae,Côte d'Ivoire,"{Channing, 2012 #1837}","{Babangenge, 2019 #1731}"
Arachnida,Araneae,Pisauridae,Actinopterygii,Unknown,Unknown,unknown,"{Chubb, 1913 #2441}","{Mccormick, 1982 #648}"
Arachnida,Araneae,Pisauridae,Amphibia,Anura,Hylidae,Brazil,"{Costa-Pereira, 2010 #1848}",
Arachnida,Araneae,Pisauridae,Actinopterygii,Cyprinodontiformes,Fundulidae,United States,"{Davis, 1891 #1874}","{Nyffeler, 2014 #1781}"
Arachnida,Araneae,Pisauridae,Actinopterygii,Unknown,Unknown,United States,"{Davis, 1891 #1874}","{Nyffeler, 2014 #1781}"
Arachnida,Araneae,Pisauridae,Amphibia,Anura,Hylidae,Mexico,"{de Luna, 2017 #2136}",
Arachnida,Araneae,Pisauridae,Amphibia,Anura,Hylidae,Brazil,"{dos Santos-Silva, 2013 #1690}",
Arachnida,Araneae,Pisauridae,Actinopterygii,Cypriniformes,Cyprinidae,Hong Kong,"{Dudgeon, 1999 #2558}","{Nyffeler, 2014 #1781}"
Arachnida,Araneae,Pisauridae,Amphibia,Anura,Hylidae,Brazil,"{Eterovick, 2001 #2559}",
Arachnida,Araneae,Pisauridae,Reptilia,Squamata,Colubridae,United States,"{Gerald, 2006 #2259}",
Arachnida,Araneae,Pisauridae,Amphibia,Anura,Hyperoliidae,Madagascar,"{Glos, 2003 #1835}","{Babangenge, 2019 #1731}"
Arachnida,Araneae,Pisauridae,Amphibia,Anura,Hylidae,United States,"{Goin, 1943 #2129}","{Toledo, 2005 #336}"
Arachnida,Araneae,Pisauridae,Amphibia,Anura,Hylidae,United States,"{Graham, 2009 #2300}",
Arachnida,Araneae,Pisauridae,Actinopterygii,Perciformes,Centrarchidae,United States,"{Gudger, 1922 #1891}","{Nyffeler, 2014 #1781}"
Arachnida,Araneae,Pisauridae,Actinopterygii,Perciformes,Centrarchidae,United States,"{Gudger, 1922 #1891}","{Nyffeler, 2014 #1781}"
Arachnida,Araneae,Pisauridae,Actinopterygii,Cypriniformes,Cyprinidae,United States,"{Gudger, 1922 #1891}","{Nyffeler, 2014 #1781}"
Arachnida,Araneae,Pisauridae,Actinopterygii,Cypriniformes,Cyprinidae,United States,"{Gudger, 1922 #1891}","{Nyffeler, 2014 #1781}"
Arachnida,Araneae,Pisauridae,Actinopterygii,Cypriniformes,Cyprinidae,unknown,"{Gudger, 1925 #1892}","{Mccormick, 1982 #648}"
Arachnida,Araneae,Pisauridae,Actinopterygii,Unknown,Unknown,United States,"{Gudger, 1925 #1892}","{Mccormick, 1982 #648}"
Arachnida,Araneae,Pisauridae,Actinopterygii,Salmoniformes,Salmonidae,United States,"{Gudger, 1925 #1892}","{Nyffeler, 2014 #1781}"
Arachnida,Araneae,Pisauridae,Actinopterygii,Salmoniformes,Salmonidae,United States,"{Gudger, 1925 #1892}","{Nyffeler, 2014 #1781}"
Arachnida,Araneae,Pisauridae,Actinopterygii,Characiformes,Unknown,United States,"{Gudger, 1925 #1892}","{Nyffeler, 2014 #1781}"
Arachnida,Araneae,Pisauridae,Actinopterygii,Cypriniformes,Cyprinidae,United States,"{Gudger, 1931 #1872}","{Nyffeler, 2014 #1781}"
Arachnida,Araneae,Pisauridae,Actinopterygii,Perciformes,Percidae,Japan,"{H., 1995 #2557}","{Nyffeler, 2014 #1781}"
Arachnida,Araneae,Pisauridae,Amphibia,Anura,Leptodactylidae,Panama,"{Jara, 2008 #1683}","{Johnson, 1996 #2251}"
Arachnida,Araneae,Pisauridae,Actinopterygii,Unknown,Unknown,China,"{Jiang, 2013 #1882}","{Nyffeler, 2014 #1781}"
Arachnida,Araneae,Pisauridae,Amphibia,Anura,Hylidae,United States,"{Johnson, 1996 #2251}",
Arachnida,Araneae,Pisauridae,Reptilia,Squamata,Elapidae,United States,"{Jones, 2011 #2288}",
Arachnida,Araneae,Pisauridae,Amphibia,Anura,Hylidae,United States,"{Konvalina, 2015 #2335}",
Arachnida,Araneae,Pisauridae,Amphibia,Anura,Ranidae,Japan,"{Kosuge, 2002 #1990}","{Baba, 2019 #1619}"
Arachnida,Araneae,Pisauridae,Actinopterygii,Cyprinodontiformes,Poeciliidae,United States,"{Krupa, 1998 #1877}","{Nyffeler, 2014 #1781}"
Arachnida,Araneae,Pisauridae,Reptilia,Squamata,Colubridae,Mexico,"{Lazcano, 2005 #2243}",
Arachnida,Araneae,Pisauridae,Amphibia,Anura,Hylidae,Brazil,"{Luiz, 2013 #1718}",
Arachnida,Araneae,Pisauridae,Amphibia,Anura,Hylidae,Brazil,"{Machado, 2014 #1755}",
Arachnida,Araneae,Pisauridae,Amphibia,Anura,Hylidae,Brazil,"{Marra, 2003 #2127}","{Toledo, 2005 #336}"
Arachnida,Araneae,Pisauridae,Amphibia,Anura,Hylidae,unknown,"{Mccormick, 1982 #648}","{Mccormick, 1982 #648}"
Arachnida,Araneae,Pisauridae,Amphibia,Anura,Hyperoliidae,Uganda,"{McIntyre, 1999 #1986}","{Babangenge, 2019 #1731}"
Arachnida,Araneae,Pisauridae,Actinopterygii,Cypriniformes,Cyprinidae,Australia,"{McKeown, 1943 #1870}","{Mccormick, 1982 #648}"
Arachnida,Araneae,Pisauridae,Actinopterygii,Cypriniformes,Cyprinidae,Australia,"{McKeown, 1943 #1870}","{Mccormick, 1982 #648}"
Arachnida,Araneae,Pisauridae,Actinopterygii,Cypriniformes,Cyprinidae,Australia,"{McKeown, 1943 #1870}","{Nyffeler, 2014 #1781}"
Arachnida,Araneae,Pisauridae,Actinopterygii,Cypriniformes,Cyprinidae,Australia,"{McKeown, 1943 #1870}","{Nyffeler, 2014 #1781}"
Arachnida,Araneae,Pisauridae,Actinopterygii,Cypriniformes,Cyprinidae,Australia,"{McKeown, 1943 #1870}","{Nyffeler, 2014 #1781}"
Arachnida,Araneae,Pisauridae,Actinopterygii,Cypriniformes,Cyprinidae,Australia,"{McKeown, 1943 #1870}","{Nyffeler, 2014 #1781}"
Arachnida,Araneae,Pisauridae,Actinopterygii,Cypriniformes,Cyprinidae,Australia,"{McKeown, 1943 #1870}","{Nyffeler, 2014 #1781}"
Arachnida,Araneae,Pisauridae,Actinopterygii,Unknown,Unknown,Australia,"{McKeown, 1943 #1870}","{Nyffeler, 2014 #1781}"
Arachnida,Araneae,Pisauridae,Actinopterygii,Perciformes,Centrarchidae,United States,"{Meehean, 1934 #1880}","{Nyffeler, 2014 #1781}"
Arachnida,Araneae,Pisauridae,Actinopterygii,Siluriformes,Ictaluridae,United States,"{Meehean, 1934 #1880}","{Nyffeler, 2014 #1781}"
Arachnida,Araneae,Pisauridae,Actinopterygii,Cyprinodontiformes,Poeciliidae,United States,"{Meehean, 1934 #1880}","{Nyffeler, 2014 #1781}"
Arachnida,Araneae,Pisauridae,Actinopterygii,Cyprinodontiformes,Cyprinodontidae,United States,"{Melisi, 2016 #161}",
Arachnida,Araneae,Pisauridae,Amphibia,Anura,Hyperoliidae,South Africa,"{Minter, 2004 #1985}","{Babangenge, 2019 #1731}"
Arachnida,Araneae,Pisauridae,Amphibia,Anura,Pyxicephalidae,South Africa,"{Minter, 2004 #1985}","{Babangenge, 2019 #1731}"
Arachnida,Araneae,Pisauridae,Amphibia,Anura,Hylidae,United States,"{Mitchell, 1990 #2124}","{Toledo, 2005 #336}"
Arachnida,Araneae,Pisauridae,Actinopterygii,Cypriniformes,Cyprinidae,United States,"{Mohrhardt, 1963 #1876}","{Nyffeler, 2014 #1781}"
Arachnida,Araneae,Pisauridae,Reptilia,Squamata,Agamidae,Japan,"{Nishi, 2016 #1989}","{Baba, 2019 #1619}"
Arachnida,Araneae,Pisauridae,Actinopterygii,Unknown,Unknown,Australia,"{Nyffeler, 2001 #1887}","{Nyffeler, 2014 #1781}"
Arachnida,Araneae,Pisauridae,Mammalia,Chiroptera,Vespertilionidae,United States,"{Nyffeler, 2013 #1714}","{Nyffeler, 2013 #1714}"
Arachnida,Araneae,Pisauridae,Actinopterygii,Unknown,Unknown,Taiwan,"{Nyffeler, 2014 #1781}","{Nyffeler, 2014 #1781}"
Arachnida,Araneae,Pisauridae,Actinopterygii,Perciformes,Centrarchidae,United States,"{Nyffeler, 2014 #1781}","{Nyffeler, 2014 #1781}"
Arachnida,Araneae,Pisauridae,Actinopterygii,Perciformes,Centrarchidae,United States,"{Nyffeler, 2014 #1781}","{Nyffeler, 2014 #1781}"
Arachnida,Araneae,Pisauridae,Actinopterygii,Cypriniformes,Cyprinidae,Australia,"{Nyffeler, 2014 #1781}","{Nyffeler, 2014 #1781}"
Arachnida,Araneae,Pisauridae,Actinopterygii,Cypriniformes,Cyprinidae,United States,"{Nyffeler, 2014 #1781}","{Nyffeler, 2014 #1781}"
Arachnida,Araneae,Pisauridae,Actinopterygii,Cypriniformes,Cyprinidae,United States,"{Nyffeler, 2014 #1781}","{Nyffeler, 2014 #1781}"
Arachnida,Araneae,Pisauridae,Actinopterygii,Cypriniformes,Cyprinidae,United States,"{Nyffeler, 2014 #1781}","{Nyffeler, 2014 #1781}"
Arachnida,Araneae,Pisauridae,Actinopterygii,Cypriniformes,Cyprinidae,United States,"{Nyffeler, 2014 #1781}","{Nyffeler, 2014 #1781}"
Arachnida,Araneae,Pisauridae,Actinopterygii,Cyprinodontiformes,Fundulidae,United States,"{Nyffeler, 2014 #1781}","{Nyffeler, 2014 #1781}"
Arachnida,Araneae,Pisauridae,Actinopterygii,Galaxiiformes,Galaxiidae,Australia,"{Nyffeler, 2014 #1781}","{Nyffeler, 2014 #1781}"
Arachnida,Araneae,Pisauridae,Actinopterygii,Gasterosteiformes,Gasterosteidae,UK,"{Nyffeler, 2014 #1781}","{Nyffeler, 2014 #1781}"
Arachnida,Araneae,Pisauridae,Actinopterygii,Atheriniformes,Melanotaeniidae,Australia,"{Nyffeler, 2014 #1781}","{Nyffeler, 2014 #1781}"
Arachnida,Araneae,Pisauridae,Actinopterygii,Atheriniformes,Melanotaeniidae,Australia,"{Nyffeler, 2014 #1781}","{Nyffeler, 2014 #1781}"
Arachnida,Araneae,Pisauridae,Actinopterygii,Cyprinodontiformes,Nothobranchiidae,Cameroon,"{Nyffeler, 2014 #1781}","{Nyffeler, 2014 #1781}"
Arachnida,Araneae,Pisauridae,Actinopterygii,Cyprinodontiformes,Poeciliidae,United States,"{Nyffeler, 2014 #1781}","{Nyffeler, 2014 #1781}"
Arachnida,Araneae,Pisauridae,Actinopterygii,Cyprinodontiformes,Poeciliidae,Australia,"{Nyffeler, 2014 #1781}","{Nyffeler, 2014 #1781}"
Arachnida,Araneae,Pisauridae,Actinopterygii,Cyprinodontiformes,Poeciliidae,Italy,"{Nyffeler, 2014 #1781}","{Nyffeler, 2014 #1781}"
Arachnida,Araneae,Pisauridae,Actinopterygii,Cyprinodontiformes,Poeciliidae,United States,"{Nyffeler, 2014 #1781}","{Nyffeler, 2014 #1781}"
Arachnida,Araneae,Pisauridae,Actinopterygii,Cyprinodontiformes,Poeciliidae,United States,"{Nyffeler, 2014 #1781}","{Nyffeler, 2014 #1781}"
Arachnida,Araneae,Pisauridae,Actinopterygii,Cyprinodontiformes,Poeciliidae,United States,"{Nyffeler, 2014 #1781}","{Nyffeler, 2014 #1781}"
Arachnida,Araneae,Pisauridae,Actinopterygii,Cyprinodontiformes,Poeciliidae,United States,"{Nyffeler, 2014 #1781}","{Nyffeler, 2014 #1781}"
Arachnida,Araneae,Pisauridae,Actinopterygii,Cyprinodontiformes,Poeciliidae,United States,"{Nyffeler, 2014 #1781}","{Nyffeler, 2014 #1781}"
Arachnida,Araneae,Pisauridae,Actinopterygii,Cyprinodontiformes,Poeciliidae,United States,"{Nyffeler, 2014 #1781}","{Nyffeler, 2014 #1781}"
Arachnida,Araneae,Pisauridae,Actinopterygii,Cyprinodontiformes,Nothobranchiidae,United States,"{Nyffeler, 2014 #1781}","{Nyffeler, 2014 #1781}"
Arachnida,Araneae,Pisauridae,Actinopterygii,Perciformes,Centrarchidae,Canada,"{Nyffeler, 2014 #1781}","{Nyffeler, 2014 #1781}"
Arachnida,Araneae,Pisauridae,Actinopterygii,Unknown,Unknown,South Africa,"{Nyffeler, 2014 #1781}","{Nyffeler, 2014 #1781}"
Arachnida,Araneae,Pisauridae,Actinopterygii,Gasterosteiformes,Gasterosteidae,UK,"{Nyffeler, 2014 #1781}","{Nyffeler, 2014 #1781}"
Arachnida,Araneae,Pisauridae,Actinopterygii,Unknown,Unknown,United States,"{Nyffeler, 2014 #1781}","{Nyffeler, 2014 #1781}"
Arachnida,Araneae,Pisauridae,Actinopterygii,Unknown,Unknown,United States,"{Nyffeler, 2014 #1781}","{Nyffeler, 2014 #1781}"
Arachnida,Araneae,Pisauridae,Actinopterygii,Unknown,Unknown,United States,"{Nyffeler, 2014 #1781}","{Nyffeler, 2014 #1781}"
Arachnida,Araneae,Pisauridae,Actinopterygii,Unknown,Unknown,United States,"{Nyffeler, 2014 #1781}","{Nyffeler, 2014 #1781}"
Arachnida,Araneae,Pisauridae,Actinopterygii,Unknown,Unknown,United States,"{Nyffeler, 2014 #1781}","{Nyffeler, 2014 #1781}"
Arachnida,Araneae,Pisauridae,Actinopterygii,Unknown,Unknown,United States,"{Nyffeler, 2014 #1781}","{Nyffeler, 2014 #1781}"
Arachnida,Araneae,Pisauridae,Actinopterygii,Unknown,Unknown,United States,"{Nyffeler, 2014 #1781}","{Nyffeler, 2014 #1781}"
Arachnida,Araneae,Pisauridae,Actinopterygii,Unknown,Unknown,Zimbabwe,"{Nyffeler, 2014 #1781}","{Nyffeler, 2014 #1781}"
Arachnida,Araneae,Pisauridae,Actinopterygii,Cypriniformes,Cyprinidae,Australia,"{Nyffeler, 2014 #1781}","{Nyffeler, 2014 #1781}"
Arachnida,Araneae,Pisauridae,Amphibia,Anura,Hylidae,United States,"{Owen, 1997 #2202}","{Toledo, 2005 #336}"
Arachnida,Araneae,Pisauridae,Actinopterygii,Salmoniformes,Salmonidae,South Africa,"{PICKARD‐CAMBRIDGE, 1903 #1890}","{Nyffeler, 2014 #1781}"
Arachnida,Araneae,Pisauridae,Amphibia,Anura,Hylidae,Brazil,"{Pinto-Silva, 2018 #2342}",
Arachnida,Araneae,Pisauridae,Amphibia,Anura,Hylidae,Brazil,"{Pombal Jr, 2007 #2389}",
Arachnida,Araneae,Pisauridae,Amphibia,Anura,Hyperoliidae,Cameroon,"{Portik, 2018 #1838}","{Babangenge, 2019 #1731}"
Arachnida,Araneae,Pisauridae,Amphibia,Anura,Hylidae,Paraguay,"{Pramuk, 2002 #2118}","{Toledo, 2005 #336}"
Arachnida,Araneae,Pisauridae,Amphibia,Anura,Ranidae,Indonesia,"{Riehl, 2008 #2307}",
Arachnida,Araneae,Pisauridae,Amphibia,Anura,Hyperoliidae,Côte d'Ivoire,"{Rodel, 2004 #1834}","{Babangenge, 2019 #1731}"
Arachnida,Araneae,Pisauridae,Amphibia,Anura,Hyperoliidae,Côte d'Ivoire,"{Rodel, 2004 #1834}","{Babangenge, 2019 #1731}"
Arachnida,Araneae,Pisauridae,Amphibia,Anura,Pipidae,United States,"{Rogers, 1996 #2113}","{Toledo, 2005 #336}"
Arachnida,Araneae,Pisauridae,Actinopterygii,Cyprinodontiformes,Nothobranchiidae,Côte d'Ivoire,"{Romand, 1980 #2556}","{Nyffeler, 2014 #1781}"
Arachnida,Araneae,Pisauridae,Actinopterygii,Cyprinodontiformes,Nothobranchiidae,Côte d'Ivoire,"{Romand, 1980 #2556}","{Nyffeler, 2014 #1781}"
Arachnida,Araneae,Pisauridae,Amphibia,Anura,Unknown,Peru,"{Rudolf von May, 2019 #252}",
Arachnida,Araneae,Pisauridae,Amphibia,Anura,Bufonidae,unknown,"{Savory, 1928 #2483}","{Mccormick, 1982 #648}"
Arachnida,Araneae,Pisauridae,Amphibia,Anura,Microhylidae,unknown,"{Savory, 1928 #2483}","{Mccormick, 1982 #648}"
Arachnida,Araneae,Pisauridae,Actinopterygii,Unknown,Unknown,unknown,"{Savory, 1928 #2483}","{Mccormick, 1982 #648}"
Arachnida,Araneae,Pisauridae,Amphibia,Anura,Leptodactylidae,Brazil,"{Schiesari, 1995 #2122}","{Toledo, 2005 #336}"
Arachnida,Araneae,Pisauridae,Amphibia,Anura,Hylidae,Bolivia,"{Schulze, 2010 #1720}",
Arachnida,Araneae,Pisauridae,Amphibia,Anura,Phrynobatrachidae,South Africa,"{Sierwald, 1983 #1987}","{Babangenge, 2019 #1731}"
Arachnida,Araneae,Pisauridae,Amphibia,Anura,Pipidae,South Africa,"{Sierwald, 1988 #1886}","{Babangenge, 2019 #1731}"
Arachnida,Araneae,Pisauridae,Actinopterygii,Cypriniformes,Cyprinidae,Borneo,"{Sierwald, 1988 #1886}","{Nyffeler, 2014 #1781}"
Arachnida,Araneae,Pisauridae,Actinopterygii,Cypriniformes,Cyprinidae,unknown,"{SPRING, 1859 #2510}","{Mccormick, 1982 #648}"
Arachnida,Araneae,Pisauridae,Reptilia,Squamata,Scincidae,United States,"{Stephen, 2016 #2285}",
Arachnida,Araneae,Pisauridae,Actinopterygii,Cyprinodontiformes,Poeciliidae,United States,"{Suhr, 1974 #1875}","{Nyffeler, 2014 #1781}"
Arachnida,Araneae,Pisauridae,Amphibia,Anura,Rhacophoridae,China,"{Sung, 2013 #2323}",
Arachnida,Araneae,Pisauridae,Amphibia,Anura,Hylidae,Japan,"{Toledo, 2005 #336}","{Toledo, 2005 #336}"
Arachnida,Araneae,Pisauridae,Amphibia,Anura,Hyperoliidae,Tanzania,"{Vonesh, 2003 #1836}","{Babangenge, 2019 #1731}"
Arachnida,Araneae,Pisauridae,Amphibia,Anura,Hyperoliidae,Tanzania,"{Vonesh, 2003 #1836}","{Babangenge, 2019 #1731}"
Arachnida,Araneae,Pisauridae,Amphibia,Anura,Hylidae,Brazil,"{Zina, 2006 #2245}",
Arachnida,Araneae,Salticidae,Amphibia,Anura,Ranixalidae,India,"{Ahmed, 2017 #1736}",
Arachnida,Araneae,Salticidae,Reptilia,Squamata,Dactyloidae,United States,"{Nyffeler, 2017 #1745}","{Nyffeler, 2017 #1745}"
Arachnida,Araneae,Salticidae,Reptilia,Squamata,Dactyloidae,United States,"{Nyffeler, 2017 #1745}","{Nyffeler, 2017 #1745}"
Arachnida,Araneae,Salticidae,Amphibia,Anura,Hylidae,United States,"{Nyffeler, 2017 #1745}","{Nyffeler, 2017 #1745}"
Arachnida,Araneae,Salticidae,Amphibia,Anura,Hylidae,United States,"{Nyffeler, 2017 #1745}","{Nyffeler, 2017 #1745}"
Arachnida,Araneae,Salticidae,Amphibia,Anura,Hylidae,United States,"{Nyffeler, 2017 #1745}","{Nyffeler, 2017 #1745}"
Arachnida,Araneae,Salticidae,Amphibia,Anura,Hylidae,United States,"{Nyffeler, 2017 #1745}","{Nyffeler, 2017 #1745}"
Arachnida,Araneae,Salticidae,Amphibia,Anura,Hylidae,United States,"{Nyffeler, 2017 #1745}","{Nyffeler, 2017 #1745}"
Arachnida,Araneae,Salticidae,Amphibia,Anura,Hylidae,United States,"{O'NEILL, 1996 #1967}","{Nyffeler, 2017 #1745}"
Arachnida,Araneae,Sparassidae,Amphibia,Anura,Ceratobatrachidae,Borneo,"{Asad, 2018 #2063}",
Arachnida,Araneae,Sparassidae,Reptilia,Squamata,Gekkonidae,South Africa,"{Bauer, 1990 #2196}","{Bauer, 1990 #2196}"
Arachnida,Araneae,Sparassidae,Mammalia,Chiroptera,Vespertilionidae,India,"{Bhattacharya, 1941 #1860}","{Nyffeler, 2013 #1714}"
Arachnida,Araneae,Sparassidae,Amphibia,Anura,Leptodactylidae,Puerto Rico,"{Formanowicz Jr, 1981 #1802}","{Menin, 2005 #1777}"
Arachnida,Araneae,Sparassidae,Reptilia,Squamata,Dactyloidae,Mexico,"{García-Balderas, 2016 #2520}",
Arachnida,Araneae,Sparassidae,Amphibia,Anura,Ranidae,puerto rico,"{Hamidy, 2010 #2292}",
Arachnida,Araneae,Sparassidae,Reptilia,Squamata,Gekkonidae,Australia,"{Hamilton, 2011 #2338}",
Arachnida,Araneae,Sparassidae,Reptilia,Squamata,Gekkonidae,Namibia,"{Henschel, 1994 #1807}",
Arachnida,Araneae,Sparassidae,Reptilia,Squamata,Lacertidae,Namibia,"{Henschel, 1994 #1807}",
Arachnida,Araneae,Sparassidae,Reptilia,Squamata,Gekkonidae,Africa,"{Lamoral, 1971 #2411}","{Schalk, 2018 #1732}"
Arachnida,Araneae,Sparassidae,Reptilia,Squamata,Gekkonidae,Africa,"{Lamoral, 1971 #2411}","{Schalk, 2018 #1732}"
Arachnida,Araneae,Sparassidae,Reptilia,Squamata,Gekkonidae,Africa,"{Lamoral, 1971 #2411}","{Schalk, 2018 #1732}"
Arachnida,Araneae,Sparassidae,Reptilia,Squamata,Diplodactylidae,Australia,"{Lange, 2007 #2405}","{Schalk, 2018 #1732}"
Arachnida,Araneae,Sparassidae,Mammalia,Rodentia,Muridae,Australia,"{McKeown, 1952 #1975}","{Nyffeler, 2018 #1729}"
Arachnida,Araneae,Sparassidae,Amphibia,Anura,Rhacophoridae,Borneo,"{Min, 2019 #2273}",
Arachnida,Araneae,Sparassidae,Reptilia,Squamata,Gekkonidae,Bangladesh,"{Neogi, 2017 #1826}",
Arachnida,Araneae,Sparassidae,Reptilia,Squamata,Gekkonidae,Australia,"{Nordberg, 2018 #182}",
Arachnida,Araneae,Sparassidae,Amphibia,Anura,Hylidae,Australia,"{Nordberg, 2018 #182}",
Arachnida,Araneae,Sparassidae,Amphibia,Anura,Bufonidae,Sri Lanka,"{Priyadarshana, 2015 #2334}",
Arachnida,Araneae,Sparassidae,Reptilia,Squamata,Gekkonidae,Sri Lanka,"{Priyadashana, 2016 #2284}",
Arachnida,Araneae,Sparassidae,Reptilia,Squamata,Gekkonidae,Bangladesh,"{Purkayastha, 2011 #2339}",
Arachnida,Araneae,Sparassidae,Amphibia,Anura,Leptodactylidae,Puerto Rico,"{Reagan, 1996 #1911}","{Villanueva-Rivera, 2000 #1910}"
Arachnida,Araneae,Sparassidae,Reptilia,Squamata,Scincidae,Australia,"{Shine, 2016 #1751}",
Arachnida,Araneae,Sparassidae,Amphibia,Anura,Rhacophoridae,Japan,"{Tanaka, 2013 #2324}",
Arachnida,Araneae,Sparassidae,Reptilia,Squamata,Gekkonidae,India,"{Vyas,  #2391}",
Arachnida,Araneae,Sparassidae,Reptilia,Squamata,Gekkonidae,South Africa,"{Warren, 1923 #2471}","{Schalk, 2018 #1732}"
Arachnida,Araneae,Sparassidae,Mammalia,Rodentia,Muridae,Australia,"{Whyte, 2017 #1977}","{Nyffeler, 2018 #1729}"
Arachnida,Araneae,Theraphosidae,Reptilia,Squamata,Colubridae,Mexico,"{Aguilar-López, 2014 #2404}",
Arachnida,Araneae,Theraphosidae,Reptilia,Squamata,Gekkonidae,Brazil,"{Almeida, 2019 #2264}",
Arachnida,Araneae,Theraphosidae,Reptilia,Squamata,Teiidae,Brazil,"{Alves Coêlho, 2019 #2265}",
Arachnida,Araneae,Theraphosidae,Reptilia,Squamata,Colubridae,Brazil,"{Araujo, 2013 #2317}",
Arachnida,Araneae,Theraphosidae,Reptilia,Squamata,Viperidae,Brazil,"{Avila, 2008 #2304}",
Arachnida,Araneae,Theraphosidae,Amphibia,Gymnophiona,Caeciliidae,French Guiana,"{Boistel, 2002 #1839}","{Menin, 2005 #1777}"
Arachnida,Araneae,Theraphosidae,Amphibia,Anura,Leptodactylidae,French Guiana,"{Boistel, 2002 #2144}","{Menin, 2005 #1777}"
Arachnida,Araneae,Theraphosidae,Reptilia,Squamata,Colubridae,Brazil,"{Borges, 2016 #1806}",
Arachnida,Araneae,Theraphosidae,Aves,Passeriformes,Thamnophilidae,Brazil,"{Carvalho, 2016 #1829}",
Arachnida,Araneae,Theraphosidae,Amphibia,Anura,Leptodactylidae,Brazil,"{Costa, 2010 #2290}",
Arachnida,Araneae,Theraphosidae,Amphibia,Anura,Dendrobatidae,Brazil,"{Da Costa, 2006 #2249}",
Arachnida,Araneae,Theraphosidae,Reptilia,Squamata,Colubridae,Brazil,"{da Silva, 2019 #1699}",
Arachnida,Araneae,Theraphosidae,Mammalia,Chiroptera,Vespertilionidae,India,"{Das, 2012 #1713}","{Nyffeler, 2013 #1714}"
Arachnida,Araneae,Theraphosidae,Reptilia,Squamata,Phrynosomatidae,Mexico,"{David Lazcano Villarreal , 2012 #2409}","{Schalk, 2018 #1732}"
Arachnida,Araneae,Theraphosidae,Mammalia,Chiroptera,Mormoopidae,Brazil,"{Dias, 2015 #1705}",
Arachnida,Araneae,Theraphosidae,Amphibia,Anura,Scaphiopodidae,Mexico,"{Farr, 2010 #2051}",
Arachnida,Araneae,Theraphosidae,Aves,Apodiformes,Trochilidae,United States,"{Gertsch, 1979 #2431}","{Mccormick, 1982 #648}"
Arachnida,Araneae,Theraphosidae,Amphibia,Anura,Unknown,United States,"{Gertsch, 1979 #2431}","{Mccormick, 1982 #648}"
Arachnida,Araneae,Theraphosidae,Amphibia,Anura,Leiuperidae,Panama,"{Gray, 1999 #2141}","{Menin, 2005 #1777}"
Arachnida,Araneae,Theraphosidae,Reptilia,Squamata,Dactyloidae,unknown,"{Gudger, 1925 #1892}","{Mccormick, 1982 #648}"
Arachnida,Araneae,Theraphosidae,Aves,Unknown,Unknown,unknown,"{Gudger, 1925 #1892}","{Mccormick, 1982 #648}"
Arachnida,Araneae,Theraphosidae,Reptilia,Squamata,Gymnophthalmidae,Brazil,"{Gurgel de SoUnited States, 2010 #2294}",
Arachnida,Araneae,Theraphosidae,Amphibia,Anura,Hylidae,Mexico,"{Jiménez-Arcos, 2014 #1937}",
Arachnida,Araneae,Theraphosidae,Reptilia,Squamata,Colubridae,Brazil,"{Jorge, 2016 #2286}",
Arachnida,Araneae,Theraphosidae,Reptilia,Squamata,Teiidae,Argentina,"{Kass, 2018 #2341}",
Arachnida,Araneae,Theraphosidae,Reptilia,Squamata,Teiidae,Brazil,"{Leite, 2019 #2271}",
Arachnida,Araneae,Theraphosidae,Amphibia,Anura,Limnodynastidae,Australia,"{Main, 1956 #2432}","{Mccormick, 1982 #648}"
Arachnida,Araneae,Theraphosidae,Reptilia,Squamata,Unknown,Australia,"{McKeown, 1952 #1975}","{Mccormick, 1982 #648}"
Arachnida,Araneae,Theraphosidae,Amphibia,Anura,Bufonidae,Brazil,"{Menin, 2005 #1777}",
Arachnida,Araneae,Theraphosidae,Amphibia,Anura,Bufonidae,Brazil,"{Menin, 2005 #1777}",
Arachnida,Araneae,Theraphosidae,Amphibia,Anura,Hylidae,Brazil,"{Menin, 2005 #1777}",
Arachnida,Araneae,Theraphosidae,Amphibia,Anura,Hylidae,Brazil,"{Menin, 2005 #1777}",
Arachnida,Araneae,Theraphosidae,Aves,Unknown,Unknown,Australia,"{Nordberg, 2018 #182}",
Arachnida,Araneae,Theraphosidae,Reptilia,Squamata,Elapidae,Brazil,"{Nunes, 2010 #2291}","{Schalk, 2018 #1732}"
Arachnida,Araneae,Theraphosidae,Reptilia,Squamata,Elapidae,Brazil,"{Nunes, 2010 #2291}",
Arachnida,Araneae,Theraphosidae,Mammalia,Chiroptera,Emballonuridae,Peru,"{Nyffeler, 2013 #1714}","{Nyffeler, 2013 #1714}"
Arachnida,Araneae,Theraphosidae,Mammalia,Chiroptera,Unknown,Brazil,"{Nyffeler, 2013 #1714}","{Nyffeler, 2013 #1714}"
Arachnida,Araneae,Theraphosidae,Mammalia,Chiroptera,Vespertilionidae,Ecuador,"{Nyffeler, 2013 #1714}","{Nyffeler, 2013 #1714}"
Arachnida,Araneae,Theraphosidae,Mammalia,Rodentia,Heteromyidae,United States,"{Nyffeler, 2018 #1729}","{Nyffeler, 2018 #1729}"
Arachnida,Araneae,Theraphosidae,Reptilia,Squamata,Tropiduridae,Brazil,"{Piauí, 2014 #1895}",
Arachnida,Araneae,Theraphosidae,Mammalia,Rodentia,Muridae,India,"{Pocock, 1899 #2521}","{Nyffeler, 2018 #1729}"
Arachnida,Araneae,Theraphosidae,Amphibia,Anura,Limnodynastidae,Australia,"{Raven, 1990 #1795}","{Toledo, 2005 #336}"
Arachnida,Araneae,Theraphosidae,Mammalia,Didelphimorphia,Didelphidae,Peru,"{Rudolf von May, 2019 #252}",
Arachnida,Araneae,Theraphosidae,Amphibia,Anura,Microhylidae,Peru,"{Rudolf von May, 2019 #252}",
Arachnida,Araneae,Theraphosidae,Reptilia,Squamata,Tropiduridae,Brazil,"{Silva Vieira, 2012 #1798}",
Arachnida,Araneae,Theraphosidae,Reptilia,Squamata,Scincidae,Mexico,"{Streicher, 2011 #2410}","{Schalk, 2018 #1732}"
Arachnida,Araneae,Theraphosidae,Amphibia,Anura,Dendrobatidae,Panama,"{Summers, 1999 #1924}","{Menin, 2005 #1777}"
Arachnida,Araneae,Theraphosidae,Amphibia,Anura,Hylidae,Brazil,"{Toledo, 2005 #336}","{Toledo, 2005 #336}"
Arachnida,Araneae,Theraphosidae,Amphibia,Anura,Hylidae,Brazil,"{Toledo, 2005 #336}","{Toledo, 2005 #336}"
Arachnida,Araneae,Theraphosidae,Reptilia,Squamata,Tropiduridae,Brazil,"{Vieira, 2012 #1689}",
Arachnida,Araneae,Theridiidae,Reptilia,Squamata,Colubridae,South Africa,"{Bayliss, 2001 #2253}",
Arachnida,Araneae,Theridiidae,Reptilia,Squamata,Lamprophiidae,South Africa,"{Bayliss, 2001 #2253}",
Arachnida,Araneae,Theridiidae,Reptilia,Squamata,Colubridae,United States,"{Beaman, 2014 #2313}",
Arachnida,Araneae,Theridiidae,Mammalia,Rodentia,Muridae,United States,"{Blair, 1934 #2523}","{Nyffeler, 2018 #1729}"
Arachnida,Araneae,Theridiidae,Reptilia,Squamata,Lacertidae,Israel,"{Blondheim, 1989 #1804}",
Arachnida,Araneae,Theridiidae,Reptilia,Squamata,Lacertidae,Israel,"{Blondheim, 1989 #1804}",
Arachnida,Araneae,Theridiidae,Reptilia,Squamata,Teiidae,Mexico,"{Carbajal-Marquez, 2013 #2314}",
Arachnida,Araneae,Theridiidae,Mammalia,Rodentia,Muridae,United States,"{Clagget, 1914 #1980}","{Nyffeler, 2018 #1729}"
Arachnida,Araneae,Theridiidae,Mammalia,Rodentia,Muridae,United States,"{Clagget, 1914 #1980}","{Nyffeler, 2018 #1729}"
Arachnida,Araneae,Theridiidae,Reptilia,Squamata,Scincidae,Italy,"{Colombo, 2013 #2031}",
Arachnida,Araneae,Theridiidae,Reptilia,Squamata,Scincidae,Australia,"{Cook, 1973 #2383}","{O’Shea, 2017 #1754}"
Arachnida,Araneae,Theridiidae,Mammalia,Primates,Cheirogaleidae,United States,"{Crane, 2013 #2525}","{Nyffeler, 2018 #1729}"
Arachnida,Araneae,Theridiidae,Mammalia,Rodentia,Muridae,United States,"{D'Amour, 1936 #1978}","{Nyffeler, 2018 #1729}"
Arachnida,Araneae,Theridiidae,Reptilia,Squamata,Colubridae,United States,"{Davis, 2017 #2278}",
Arachnida,Araneae,Theridiidae,Reptilia,Squamata,Elapidae,Australia,"{De Rebeira, 1981 #2385}","{O’Shea, 2017 #1754}"
Arachnida,Araneae,Theridiidae,Reptilia,Squamata,Lacertidae,Ireland,"{Dunbar, 2018 #2420}",
Arachnida,Araneae,Theridiidae,Reptilia,Squamata,Dipsadidae,United States,"{Ervin, 2007 #2399}","{Schalk, 2018 #1732}"
Arachnida,Araneae,Theridiidae,Reptilia,Squamata,Lacertidae,Spain,"{Garcia-Roa, 2013 #2326}",
Arachnida,Araneae,Theridiidae,Mammalia,Rodentia,Muridae,unknown,"{Gudger, 1925 #1892}","{Mccormick, 1982 #648}"
Arachnida,Araneae,Theridiidae,Reptilia,Squamata,Unknown,unknown,"{Gudger, 1925 #1892}","{Mccormick, 1982 #648}"
Arachnida,Araneae,Theridiidae,Mammalia,Rodentia,Muridae,United States,"{Heyn, 1940 #1979}","{Nyffeler, 2018 #1729}"
Arachnida,Araneae,Theridiidae,Reptilia,Squamata,Lacertidae,Spain,"{Hódar, 2002 #2381}","{O’Shea, 2017 #1754}"
Arachnida,Araneae,Theridiidae,Reptilia,Squamata,Lacertidae,Spain,"{Hódar, 2002 #2381}","{O’Shea, 2017 #1754}"
Arachnida,Araneae,Theridiidae,Reptilia,Squamata,Lacertidae,Spain,"{Hódar, 2002 #2381}","{Schalk, 2018 #1732}"
Arachnida,Araneae,Theridiidae,Reptilia,Squamata,Phyllodactylidae,Spain,"{Hódar, 2002 #2381}","{Schalk, 2018 #1732}"
Arachnida,Araneae,Theridiidae,Reptilia,Squamata,Phyllodactylidae,Australia,"{König, 1987 #2380}","{O’Shea, 2017 #1754}"
Arachnida,Araneae,Theridiidae,Reptilia,Squamata,Typhlopidae,Mexico,"{Martínez-Coronel, 2018 #2032}",
Arachnida,Araneae,Theridiidae,Mammalia,Rodentia,Muridae,United States,"{McCook, 1889 #2443}","{Nyffeler, 2018 #1729}"
Arachnida,Araneae,Theridiidae,Mammalia,Rodentia,Muridae,Australia,"{McKeown, 1943 #1870}","{Nyffeler, 2018 #1729}"
Arachnida,Araneae,Theridiidae,Reptilia,Squamata,Scincidae,Australia,"{McKeown, 1943 #1870}","{O’Shea, 2017 #1754}"
Arachnida,Araneae,Theridiidae,Reptilia,Squamata,Scincidae,Australia,"{McKeown, 1943 #1870}","{O’Shea, 2017 #1754}"
Arachnida,Araneae,Theridiidae,Reptilia,Squamata,Elapidae,Australia,"{McKeown, 1952 #1975}","{Mccormick, 1982 #648}"
Arachnida,Araneae,Theridiidae,Reptilia,Squamata,Scincidae,Australia,"{McKeown, 1952 #1975}","{Mccormick, 1982 #648}"
Arachnida,Araneae,Theridiidae,Mammalia,Rodentia,Muridae,Australia,"{McKeown, 1952 #1975}","{Nyffeler, 2018 #1729}"
Arachnida,Araneae,Theridiidae,Mammalia,Rodentia,Muridae,Australia,"{McKeown, 1952 #1975}","{Nyffeler, 2018 #1729}"
Arachnida,Araneae,Theridiidae,Reptilia,Squamata,Elapidae,Australia,"{McKeown, 1963 #1975}","{O’Shea, 2017 #1754}"
Arachnida,Araneae,Theridiidae,Reptilia,Squamata,Scincidae,Australia,"{Metcalfe, 2013 #1796}",
Arachnida,Araneae,Theridiidae,Aves,Passeriformes,Estrildidae,Africa,"{Morris, 1963 #1999}","{Brooks, 2012 #1801}"
Arachnida,Araneae,Theridiidae,Reptilia,Squamata,Colubridae,United States,"{Neill, 1948 #2115}","{O’Shea, 2017 #1754}"
Arachnida,Araneae,Theridiidae,Reptilia,Squamata,Colubridae,United States,"{Neill, 1948 #2115}","{O’Shea, 2017 #1754}"
Arachnida,Araneae,Theridiidae,Reptilia,Squamata,Scincidae,United States,"{Neill, 1948 #2115}","{O’Shea, 2017 #1754}"
Arachnida,Araneae,Theridiidae,Mammalia,Rodentia,Cricetidae,United States,"{Neitzel, 1965 #2522}","{Nyffeler, 2018 #1729}"
Arachnida,Araneae,Theridiidae,Mammalia,Rodentia,Cricetidae,Mexico,"{Nyffeler, 2018 #1729}","{Nyffeler, 2018 #1729}"
Arachnida,Araneae,Theridiidae,Mammalia,Rodentia,Cricetidae,United States,"{Nyffeler, 2018 #1729}","{Nyffeler, 2018 #1729}"
Arachnida,Araneae,Theridiidae,Mammalia,Rodentia,Cricetidae,United States,"{Nyffeler, 2018 #1729}","{Nyffeler, 2018 #1729}"
Arachnida,Araneae,Theridiidae,Mammalia,Rodentia,Cricetidae,United States,"{Nyffeler, 2018 #1729}","{Nyffeler, 2018 #1729}"
Arachnida,Araneae,Theridiidae,Mammalia,Rodentia,Muridae,Australia,"{Nyffeler, 2018 #1729}","{Nyffeler, 2018 #1729}"
Arachnida,Araneae,Theridiidae,Mammalia,Rodentia,Muridae,Australia,"{Nyffeler, 2018 #1729}","{Nyffeler, 2018 #1729}"
Arachnida,Araneae,Theridiidae,Mammalia,Rodentia,Muridae,Australia,"{Nyffeler, 2018 #1729}","{Nyffeler, 2018 #1729}"
Arachnida,Araneae,Theridiidae,Mammalia,Rodentia,Muridae,Australia,"{Nyffeler, 2018 #1729}","{Nyffeler, 2018 #1729}"
Arachnida,Araneae,Theridiidae,Mammalia,Rodentia,Muridae,Australia,"{Nyffeler, 2018 #1729}","{Nyffeler, 2018 #1729}"
Arachnida,Araneae,Theridiidae,Mammalia,Rodentia,Muridae,Australia,"{Nyffeler, 2018 #1729}","{Nyffeler, 2018 #1729}"
Arachnida,Araneae,Theridiidae,Mammalia,Rodentia,Muridae,Australia,"{Nyffeler, 2018 #1729}","{Nyffeler, 2018 #1729}"
Arachnida,Araneae,Theridiidae,Mammalia,Rodentia,Muridae,Australia,"{Nyffeler, 2018 #1729}","{Nyffeler, 2018 #1729}"
Arachnida,Araneae,Theridiidae,Mammalia,Rodentia,Muridae,Australia,"{Nyffeler, 2018 #1729}","{Nyffeler, 2018 #1729}"
Arachnida,Araneae,Theridiidae,Mammalia,Rodentia,Muridae,Australia,"{Nyffeler, 2018 #1729}","{Nyffeler, 2018 #1729}"
Arachnida,Araneae,Theridiidae,Mammalia,Rodentia,Muridae,United States,"{Nyffeler, 2018 #1729}","{Nyffeler, 2018 #1729}"
Arachnida,Araneae,Theridiidae,Mammalia,Rodentia,Muridae,United States,"{Nyffeler, 2018 #1729}","{Nyffeler, 2018 #1729}"
Arachnida,Araneae,Theridiidae,Mammalia,Rodentia,Muridae,United States,"{Nyffeler, 2018 #1729}","{Nyffeler, 2018 #1729}"
Arachnida,Araneae,Theridiidae,Mammalia,Rodentia,Muridae,United States,"{Nyffeler, 2018 #1729}","{Nyffeler, 2018 #1729}"
Arachnida,Araneae,Theridiidae,Mammalia,Rodentia,Muridae,United States,"{Nyffeler, 2018 #1729}","{Nyffeler, 2018 #1729}"
Arachnida,Araneae,Theridiidae,Mammalia,Rodentia,Muridae,United States,"{Nyffeler, 2018 #1729}","{Nyffeler, 2018 #1729}"
Arachnida,Araneae,Theridiidae,Mammalia,Rodentia,Muridae,United States,"{Nyffeler, 2018 #1729}","{Nyffeler, 2018 #1729}"
Arachnida,Araneae,Theridiidae,Mammalia,Rodentia,Muridae,United States,"{Nyffeler, 2018 #1729}","{Nyffeler, 2018 #1729}"
Arachnida,Araneae,Theridiidae,Mammalia,Rodentia,Muridae,United States,"{Nyffeler, 2018 #1729}","{Nyffeler, 2018 #1729}"
Arachnida,Araneae,Theridiidae,Mammalia,Rodentia,Muridae,United States,"{Nyffeler, 2018 #1729}","{Nyffeler, 2018 #1729}"
Arachnida,Araneae,Theridiidae,Reptilia,Squamata,Scincidae,Australia,"{O’Shea, 2017 #1754}",
Arachnida,Araneae,Theridiidae,Reptilia,Squamata,Elapidae,Australia,"{O’Shea, 2017 #1754}",
Arachnida,Araneae,Theridiidae,Reptilia,Squamata,Elapidae,Australia,"{O’Shea, 2017 #1754}",
Arachnida,Araneae,Theridiidae,Reptilia,Squamata,Scincidae,Australia,"{O’Shea, 2017 #1754}",
Arachnida,Araneae,Theridiidae,Reptilia,Squamata,Elapidae,Australia,"{Orange, 2007 #2382}","{O’Shea, 2017 #1754}"
Arachnida,Araneae,Theridiidae,Reptilia,Squamata,Gekkonidae,Australia,"{Orange, 2007 #2382}","{O’Shea, 2017 #1754}"
Arachnida,Araneae,Theridiidae,Reptilia,Squamata,Gekkonidae,Australia,"{Orange, 2007 #2382}","{O’Shea, 2017 #1754}"
Arachnida,Araneae,Theridiidae,Reptilia,Squamata,Scincidae,Australia,"{Orange, 2007 #2382}","{O’Shea, 2017 #1754}"
Arachnida,Araneae,Theridiidae,Reptilia,Squamata,Phrynosomatidae,United States,"{Painter, 2010 #2297}",
Arachnida,Araneae,Theridiidae,Reptilia,Squamata,Typhlopidae,Europe,"{Petrov, 2000 #2422}",
Arachnida,Araneae,Theridiidae,Reptilia,Squamata,Colubridae,United States,"{Pruett, 2010 #2028}",
Arachnida,Araneae,Theridiidae,Reptilia,Squamata,Scincidae,Australia,"{Raven, 1990 #1795}","{O’Shea, 2017 #1754}"
Arachnida,Araneae,Theridiidae,Reptilia,Squamata,Scincidae,Australia,"{Raven, 1990 #1795}","{O’Shea, 2017 #1754}"
Arachnida,Araneae,Theridiidae,Reptilia,Squamata,Scincidae,Australia,"{Roberts, 1941 #2384}","{O’Shea, 2017 #1754}"
Arachnida,Araneae,Theridiidae,Reptilia,Squamata,Gekkonidae,United States,"{Roberts, 1999 #1907}","{Schalk, 2018 #1732}"
Arachnida,Araneae,Theridiidae,Reptilia,Squamata,Colubridae,Brazil,"{Rocha, 2017 #1695}",
Arachnida,Araneae,Theridiidae,Reptilia,Squamata,Lacertidae,Croatia,"{Schwammer, 1988 #2387}","{O’Shea, 2017 #1754}"
Arachnida,Araneae,Theridiidae,Reptilia,Squamata,Scincidae,Australia,"{Shine, 2016 #1751}",
Arachnida,Araneae,Theridiidae,Reptilia,Squamata,Gekkonidae,United States,"{Steiner, 1983 #2256}",
Arachnida,Araneae,Theridiidae,Reptilia,Squamata,Colubridae,United States,"{Stevenson, 2018 #2343}",
Arachnida,Araneae,Theridiidae,Reptilia,Squamata,Scincidae,United States,"{Taylor, 2010 #2052}",
Arachnida,Araneae,Theridiidae,Reptilia,Squamata,Anguidae,United States,"{Thill, 2019 #2263}",
Arachnida,Araneae,Theridiidae,Amphibia,Anura,Hylidae,Mexico,"{Tinoco, 2016 #2268}",
Arachnida,Araneae,Theridiidae,Reptilia,Squamata,Gekkonidae,Italy,"{Zamani, 2016 #2421}",
Arachnida,Araneae,Theridiidae,Reptilia,Squamata,Lacertidae,Israel,"{Zilberberg, 1988 #2386}","{O’Shea, 2017 #1754}"
Arachnida,Araneae,Trechaleidae,Reptilia,Squamata,Dactyloidae,Panama,"{Bock, 1987 #2255}",
Arachnida,Araneae,Trechaleidae,Amphibia,Anura,Hylidae,Brazil,"{Costa-Pereira, 2010 #1848}",
Arachnida,Araneae,Trechaleidae,Amphibia,Anura,Craugastoridae,Costa Rica,"{Folt, 2017 #1790}",
Arachnida,Araneae,Trechaleidae,Amphibia,Anura,Craugastoridae,Costa Rica,"{Folt, 2017 #1790}",
Arachnida,Araneae,Trechaleidae,Amphibia,Anura,Hylidae,Costa Rica,"{Folt, 2017 #1790}",
Arachnida,Araneae,Trechaleidae,Amphibia,Anura,Cycloramphidae,Brazil,"{Gaiarsa, 2012 #1666}",
Arachnida,Araneae,Trechaleidae,Actinopterygii,Characiformes,Unknown,Panama,"{Gudger, 1925 #1892}","{Nyffeler, 2014 #1781}"
Arachnida,Araneae,Trechaleidae,Amphibia,Anura,Centrolenidae,Costa Rica,"{Hayes, 1983 #1905}","{Menin, 2005 #1777}"
Arachnida,Araneae,Trechaleidae,Amphibia,Anura,Centrolenidae,Costa Rica,"{Hayes, 1983 #1905}","{Menin, 2005 #1777}"
Arachnida,Araneae,Trechaleidae,Amphibia,Anura,Craugastoridae,Costa Rica,"{Jablonski, 2015 #1735}",
Arachnida,Araneae,Trechaleidae,Reptilia,Squamata,Dactyloidae,Costa Rica,"{Losos, 2011 #1929}",
Arachnida,Araneae,Trechaleidae,Amphibia,Anura,Craugastoridae,Costa Rica,"{Murray, 2016 #1920}",
Arachnida,Araneae,Trechaleidae,Actinopterygii,Characiformes,Unknown,Panama,"{Nyffeler, 2014 #1781}","{Nyffeler, 2014 #1781}"
Arachnida,Araneae,Trechaleidae,Actinopterygii,Characiformes,Unknown,Brazil,"{Nyffeler, 2014 #1781}","{Nyffeler, 2014 #1781}"
Arachnida,Araneae,Trechaleidae,Actinopterygii,Characiformes,Unknown,Colombia,"{Nyffeler, 2014 #1781}","{Nyffeler, 2014 #1781}"
Arachnida,Araneae,Trechaleidae,Actinopterygii,Characiformes,Unknown,Colombia,"{Nyffeler, 2014 #1781}","{Nyffeler, 2014 #1781}"
Arachnida,Araneae,Trechaleidae,Amphibia,Anura,Hylidae,Costa Rica,"{Stynoski, 2014 #1928}",
Arachnida,Araneae,Trechaleidae,Amphibia,Anura,Craugastoridae,Costa Rica,"{Szelistowski, 1985 #1931}",
Arachnida,Araneae,Trechaleidae,Amphibia,Anura,Craugastoridae,Mexico,"{Vásquez-Cisneros, 2011 #2289}",
Arachnida,Araneae,Unknown,Aves,Apodiformes,Trochilidae,United States,"{Abbott, 1931 #1994}","{Brooks, 2012 #1801}"
Arachnida,Araneae,Unknown,Reptilia,Squamata,Phyllodactylidae,South Africa,"{Bauer, 1990 #2196}","{Bauer, 1990 #2196}"
Arachnida,Araneae,Unknown,Aves,Passeriformes,Parulidae,United States,"{Bent, 1953 #2000}","{Brooks, 2012 #1801}"
Arachnida,Araneae,Unknown,Aves,Passeriformes,Meliphagidae,Australia,"{Brooks, 2012 #1801}",
Arachnida,Araneae,Unknown,Reptilia,Squamata,Phyllodactylidae,Chile,"{Donoso-Barros, 1966 #2513}","{Bauer, 1990 #2196}"
Arachnida,Araneae,Unknown,Amphibia,Unknown,Unknown,United States,"{Groves, 1978 #2519}",
Arachnida,Araneae,Unknown,Reptilia,Unknown,Unknown,United States,"{Groves, 1978 #2519}",
Arachnida,Araneae,Unknown,Reptilia,Squamata,Phyllodactylidae,Uruguay,"{Gudynas, 1980 #2516}","{Bauer, 1990 #2196}"
Arachnida,Araneae,Unknown,Mammalia,Chiroptera,Vespertilionidae,Malawi,"{Happold, 1987 #1867}","{Nyffeler, 2013 #1714}"
Arachnida,Araneae,Unknown,Mammalia,Chiroptera,Vespertilionidae,United States,"{Hermanson, 1986 #1869}","{Nyffeler, 2013 #1714}"
Arachnida,Araneae,Unknown,Mammalia,Chiroptera,Vespertilionidae,United States,"{Laduc, 1993 #1868}","{Nyffeler, 2013 #1714}"
Arachnida,Araneae,Unknown,Aves,Passeriformes,Nectariniidae,Africa,"{Mann, 2010 #1998}","{Brooks, 2012 #1801}"
Arachnida,Araneae,Unknown,Aves,Passeriformes,Nectariniidae,Africa,"{Mann, 2010 #1998}","{Brooks, 2012 #1801}"
Arachnida,Araneae,Unknown,Reptilia,Squamata,Unknown,United States,"{McCartney, 1945 #1972}",
Arachnida,Araneae,Unknown,Mammalia,Chiroptera,Vespertilionidae,Australia,"{McKeown, 1952 #1975}","{Nyffeler, 2013 #1714}"
Arachnida,Araneae,Unknown,Mammalia,Chiroptera,Vespertilionidae,Malaysia,"{Medway, 1972 #1866}","{Nyffeler, 2013 #1714}"
Arachnida,Araneae,Unknown,Amphibia,Anura,Hyperoliidae,South Africa,"{Minter, 2004 #1985}","{Babangenge, 2019 #1731}"
Arachnida,Araneae,Unknown,Amphibia,Anura,Hyperoliidae,South Africa,"{Minter, 2004 #1985}","{Babangenge, 2019 #1731}"
Arachnida,Araneae,Unknown,Mammalia,Chiroptera,Vespertilionidae,UK,"{Nyffeler, 2013 #1714}","{Nyffeler, 2013 #1714}"
Arachnida,Araneae,Unknown,Mammalia,Rodentia,Muridae,United States,"{Nyffeler, 2018 #1729}","{Nyffeler, 2018 #1729}"
Arachnida,Araneae,Unknown,Mammalia,Chiroptera,Emballonuridae,Colombia,"{Ochoa, 1994 #1865}","{Nyffeler, 2013 #1714}"
Arachnida,Araneae,Unknown,Mammalia,Chiroptera,Vespertilionidae,Sierra Leone,"{Rosevear, 1965 #2555}","{Nyffeler, 2013 #1714}"
Arachnida,Araneae,Unknown,Aves,Passeriformes,Macrosphenidae,Africa,"{Vernon, 1976 #1997}","{Brooks, 2012 #1801}"
Arachnida,Araneae,Unknown,Aves,Apodiformes,Apodidae,India,"{Manchi, 2009 #2562}","{Walther, 2016 #1669}"
Arachnida,Opiliones,Cranaidae,Amphibia,Anura,Eleutherodactylidae,Venezuela,"{Manzanilla, 2008 #2138}",
Arachnida,Scorpiones,Bothriuridae,Reptilia,Squamata,Phyllodactylidae,Argentina,"{Pérez, 2014 #1704}",
Arachnida,Scorpiones,Buthidae,Reptilia,Squamata,Lacertidae,Spain,"{Castilla, 2009 #1744}",
Arachnida,Scorpiones,Buthidae,Reptilia,Squamata,Gekkonidae,Brazil,"{de Albuquerque, 2012 #2364}","{Schalk, 2018 #1732}"
Arachnida,Scorpiones,Buthidae,Amphibia,Anura,Leptodactylidae,Dominican Republic,"{de Armas, 1992 #1913}","{de Armas, 2001 #1896}"
Arachnida,Scorpiones,Buthidae,Reptilia,Squamata,Teiidae,Dominican Republic,"{de Armas, 1992 #1913}","{de Armas, 2001 #1896}"
Arachnida,Scorpiones,Buthidae,Reptilia,Squamata,Gekkonidae,Cuba,"{de Armas, 2001 #1896}",
Arachnida,Scorpiones,Buthidae,Reptilia,Squamata,Polychrotidae,Cuba,"{de Armas, 2001 #1896}",
Arachnida,Scorpiones,Buthidae,Reptilia,Squamata,Gekkonidae,Madagascar,"{Glaw, 2002 #2036}",
Arachnida,Scorpiones,Buthidae,Reptilia,Squamata,Gekkonidae,Africa,"{Lamoral, 1971 #2411}","{Schalk, 2018 #1732}"
Arachnida,Scorpiones,Buthidae,Amphibia,Anura,Leptodactylidae,Puerto Rico,"{Steward, 1996 #1912}","{Villanueva-Rivera, 2000 #1910}"
Arachnida,Scorpiones,Buthidae,Reptilia,Squamata,Gekkonidae,Russia,"{Szczerbak, 1986 #2412}","{Schalk, 2018 #1732}"
Arachnida,Scorpiones,Buthidae,Reptilia,Squamata,Gekkonidae,Russia,"{Szczerbak, 1986 #2412}","{Schalk, 2018 #1732}"
Arachnida,Scorpiones,Buthidae,Amphibia,Anura,Leptodactylidae,puerto rico,"{Villanueva-Rivera, 2000 #1910}","{Toledo, 2005 #336}"
Arachnida,Scorpiones,Caraboctonidae,Reptilia,Squamata,Leptotyphlopidae,United States,"{Anderson, 1956 #2426}","{Mccormick, 1982 #648}"
Arachnida,Scorpiones,Caraboctonidae,Reptilia,Squamata,Colubridae,United States,"{Brunson, 1951 #2428}","{Mccormick, 1982 #648}"
Arachnida,Scorpiones,Caraboctonidae,Reptilia,Squamata,Leptotyphlopidae,United States,"{Greene, 1997 #2059}",
Arachnida,Scorpiones,Caraboctonidae,Reptilia,Squamata,Eublepharidae,United States,"{Hadley, 1968 #2414}","{Schalk, 2018 #1732}"
Arachnida,Scorpiones,Caraboctonidae,Reptilia,Squamata,Colubridae,United States,"{Heyborne, 2019 #2272}",
Arachnida,Scorpiones,Caraboctonidae,Reptilia,Squamata,Colubridae,United States,"{Mayne, 2004 #2236}","{Schalk, 2018 #1732}"
Arachnida,Scorpiones,Caraboctonidae,Reptilia,Squamata,Diplodactylidae,Pakistan,"{Minton, 1966 #2511}","{Bauer, 1990 #2196}"
Arachnida,Scorpiones,Caraboctonidae,Reptilia,Squamata,Teiidae,United States,"{Stahnke, 1966 #2427}","{Mccormick, 1982 #648}"
Arachnida,Scorpiones,Caraboctonidae,Reptilia,Squamata,Phrynosomatidae,United States,"{Turner, 1998 #2242}",
Arachnida,Scorpiones,Diplocentridae,Reptilia,Squamata,Colubridae,United States,"{Hibbitts, 1992 #2034}",
Arachnida,Scorpiones,Hemiscorpiidae,Amphibia,Anura,Corytophanidae,Panama,"{Elizondo, 2015 #2363}",
Arachnida,Scorpiones,Scorpionidae,Mammalia,Rodentia,Muridae,unknown,"{Kock, 1969 #2423}","{Mccormick, 1982 #648}"
Arachnida,Scorpiones,Scorpionidae,Reptilia,Squamata,Gekkonidae,Africa,"{Lamoral, 1971 #2411}","{Schalk, 2018 #1732}"
Arachnida,Scorpiones,Scorpionidae,Reptilia,Squamata,Scincidae,unknown,"{Mccormick, 1982 #648}",
Arachnida,Scorpiones,Unknown,Mammalia,Rodentia,Muridae,Africa,"{Piasecki, 1985 #2517}",
Arachnida,Scorpiones,Vaejovidae,Reptilia,Squamata,Leptotyphlopidae,United States,"{Polis, 1979 #2424}","{Mccormick, 1982 #648}"
Arachnida,Solifugae,Ammotrechidae ,Reptilia,Squamata,Unknown,India,"{Hutton, 1843 #2430}","{Mccormick, 1982 #648}"
Arachnida,Solifugae,Eremobatidae,Reptilia,Squamata,Phrynosomatidae,United States,"{Banta, 1972 #2413}","{Schalk, 2018 #1732}"
Arachnida,Solifugae,Galeodidae,Reptilia,Squamata,Gekkonidae,Russia,"{Szczerbak, 1986 #2412}","{Schalk, 2018 #1732}"
Arachnida,Solifugae,Solpugidae,Mammalia,Rodentia,Muridae,unknown,"{Cloudsley-Thompson, 1968 #2429}","{Mccormick, 1982 #648}"
Arachnida,Solifugae,Solpugidae,Reptilia,Squamata,Unknown,unknown,"{Cloudsley-Thompson, 1968 #2429}","{Mccormick, 1982 #648}"
Arachnida,Solifugae,Solpugidae,Aves,Unknown,Unknown,unknown,"{Cloudsley-Thompson, 1968 #2429}","{Mccormick, 1982 #648}"
Arachnida,Solifugae,Unknown,Reptilia,Squamata,Gekkonidae,Africa,"{Loveridge, 1947 #2515}","{Bauer, 1990 #2196}"
Arachnida,Thelyphonida,Thelyphonidae,Amphibia,Anura,Unknown,unknown,"{Cloudsley-Thompson, 1968 #2429}","{Mccormick, 1982 #648}"
Arachnida,Thelyphonida,Thelyphonidae,Amphibia,Anura,Leptodactylidae,Cuba,"{de Armas, 1998 #1908}",
Arachnida,Thelyphonida,Thelyphonidae,Reptilia,Squamata,Colubridae,Mexico,"{Minton, 1988 #2241}",
Chilopoda,Scolopendromorpha,Scolopendridae,Reptilia,Squamata,Viperidae,Macedonia,"{Arsovski, 2014 #1823}",
Chilopoda,Scolopendromorpha,Scolopendridae,Reptilia,Squamata,Colubridae,United States,"{Babb, 2013 #2394}","{Schalk, 2018 #1732}"
Chilopoda,Scolopendromorpha,Scolopendridae,Reptilia,Squamata,Teiidae,Brazil,"{Bocchiglieri, 2009 #2345}",
Chilopoda,Scolopendromorpha,Scolopendridae,Reptilia,Squamata,Diplodactylidae,Australia,"{Butler, 1970 #2407}","{Schalk, 2018 #1732}"
Chilopoda,Scolopendromorpha,Scolopendridae,Amphibia,Anura,Bufonidae,carribean,"{Carpenter, 1984 #2131}","{Toledo, 2005 #336}"
Chilopoda,Scolopendromorpha,Scolopendridae,Reptilia,Squamata,Colubridae,Thailand,"{Chiacchio, 2017 #1640}",
Chilopoda,Scolopendromorpha,Scolopendridae,Mammalia,Rodentia,Cricetidae,United States,"{Clark, 1979 #2194}","{Mccormick, 1982 #648}"
Chilopoda,Scolopendromorpha,Scolopendridae,Mammalia,Rodentia,Cricetidae,Ecuador,"{Clark, 1979 #2194}",
Chilopoda,Scolopendromorpha,Scolopendridae,Mammalia,Chiroptera,Natalidae,Mexico,"{Coronel, 2019 #1641}",
Chilopoda,Scolopendromorpha,Scolopendridae,Reptilia,Squamata,Phrynosomatidae,United States,"{De Luna-González, 2016 #2344}",
Chilopoda,Scolopendromorpha,Scolopendridae,Reptilia,Squamata,Colubridae,United States,"{Easterla, 1975 #2439}","{Mccormick, 1982 #648}"
Chilopoda,Scolopendromorpha,Scolopendridae,Amphibia,Anura,Hylidae,Brazil,"{Forti, 2007 #1747}",
Chilopoda,Scolopendromorpha,Scolopendridae,Reptilia,Squamata,Dipsadidae,Aruba,"{Goessling, 2012 #2395}","{Schalk, 2018 #1732}"
Chilopoda,Scolopendromorpha,Scolopendridae,Reptilia,Squamata,Colubridae,Australia,"{Johnson, 2007 #2396}","{Schalk, 2018 #1732}"
Chilopoda,Scolopendromorpha,Scolopendridae,Reptilia,Squamata,Colubridae,Australia,"{Johnson, 2007 #2396}","{Schalk, 2018 #1732}"
Chilopoda,Scolopendromorpha,Scolopendridae,Reptilia,Squamata,Carphodactylidae,Australia,"{Kearney, 1998 #2203}",
Chilopoda,Scolopendromorpha,Scolopendridae,Reptilia,Squamata,Carphodactylidae,Australia,"{Kearney, 1998 #2203}",
Chilopoda,Scolopendromorpha,Scolopendridae,Reptilia,Squamata,Gekkonidae,Hawaii,"{La Rivers, 1948 #2418}","{Schalk, 2018 #1732}"
Chilopoda,Scolopendromorpha,Scolopendridae,Reptilia,Squamata,Gekkonidae,South Africa,"{Lawrence, 1953 #2508}","{Mccormick, 1982 #648}"
Chilopoda,Scolopendromorpha,Scolopendridae,Reptilia,Squamata,Xantusiidae,United States,"{Mccormick, 1982 #648}","{Mccormick, 1982 #648}"
Chilopoda,Scolopendromorpha,Scolopendridae,Aves,Passeriformes,Icteridae,neotropics,"{Menezes, 2017 #1824}","{Menezes, 2017 #1824}"
Chilopoda,Scolopendromorpha,Scolopendridae,Mammalia,Chiroptera,Mormoopidae,Venezuela,"{Molinari, 2005 #1779}",
Chilopoda,Scolopendromorpha,Scolopendridae,Mammalia,Chiroptera,Mormoopidae,Venezuela,"{Molinari, 2005 #1779}",
Chilopoda,Scolopendromorpha,Scolopendridae,Mammalia,Chiroptera,Phyllostimidae,Venezuela,"{Molinari, 2005 #1779}",
Chilopoda,Scolopendromorpha,Scolopendridae,Reptilia,Squamata,Gekkonidae,Australia,"{Nordberg, 2018 #182}",
Chilopoda,Scolopendromorpha,Scolopendridae,Mammalia,Chiroptera,Molossidae,Brazil,"{Noronha, 2015 #1752}",
Chilopoda,Scolopendromorpha,Scolopendridae,Amphibia,Urodela,Plethodontidae,United States,"{Palis, 2011 #2013}","{Jobe, 2019 #1661}"
Chilopoda,Scolopendromorpha,Scolopendridae,Reptilia,Squamata,Colubridae,Peru,"{Rudolf von May, 2019 #252}",
Chilopoda,Scolopendromorpha,Scolopendridae,Reptilia,Squamata,Elapidae,Peru,"{Rudolf von May, 2019 #252}",
Chilopoda,Scolopendromorpha,Scolopendridae,Mammalia,Rodentia,Muridae,Australia,"{Shugg, 1961 #2437}","{Mccormick, 1982 #648}"
Chilopoda,Scolopendromorpha,Scolopendridae,Mammalia,Chiroptera,Vespertilionidae,Brazil,"{Srbek-Araujo, 2012 #1637}",
Chilopoda,Scolopendromorpha,Scolopendridae,Mammalia,Chiroptera,Vespertilionidae,Brazil,"{Srbek-Araujo, 2012 #1637}",
Chilopoda,Scolopendromorpha,Scolopendridae,Reptilia,Squamata,Gekkonidae,Russia,"{Szczerbak, 1986 #2412}","{Schalk, 2018 #1732}"
Chilopoda,Scolopendromorpha,Scolopendridae,Reptilia,Squamata,Lacertidae,Croatia,"{Zimić, 2014 #1631}",
Hexanauplia,Calanoida,Euchaetidae,Actinopterygii,Unknown,Unknown,unknown,"{Barnes, 1974 #2493}","{Mccormick, 1982 #648}"
Hexanauplia,Calanoida,Pontellidae,Actinopterygii,Unknown,Unknown,unknown,"{Barnes, 1974 #2493}","{Mccormick, 1982 #648}"
Hexanauplia,Cyclopoida,Cyclopidae,Actinopterygii,Anabantiformes,Anabantidae,India,"{Banerji, 1975 #2502}","{Mccormick, 1982 #648}"
Hexanauplia,Cyclopoida,Cyclopidae,Actinopterygii,Unknown,Unknown,United Kingdom,"{Fryer, 1953 #2460}","{Mccormick, 1982 #648}"
Hexanauplia,Cyclopoida,Cyclopidae,Actinopterygii,Unknown,Unknown,United Kingdom,"{Fryer, 1953 #2460}","{Mccormick, 1982 #648}"
Hexanauplia,Cyclopoida,Cyclopidae,Actinopterygii,Cypriniformes,Cyprinidae,unknown,"{Hsu, 1963 #2462}","{Mccormick, 1982 #648}"
Hexanauplia,Cyclopoida,Cyclopidae,Actinopterygii,Cypriniformes,Cyprinidae,India,"{Lakshmanan, 1969 #2463}","{Mccormick, 1982 #648}"
Hexanauplia,Cyclopoida,Cyclopidae,Amphibia,Urodela,Ambystomatidae,unknown,"{Oliva, 1950 #2503}","{Mccormick, 1982 #648}"
Hexanauplia,Cyclopoida,Cyclopidae,Amphibia,Urodela,Ambystomatidae,unknown,"{Oliva, 1950 #2503}","{Mccormick, 1982 #648}"
Insecta,Coleoptera,Carabidae,Amphibia,Anura,Bufonidae,India,"{Barve, 2011 #2022}",
Insecta,Coleoptera,Carabidae,Amphibia,Urodela,Salamandridae,Poland,"{Bernard, 2014 #1654}",
Insecta,Coleoptera,Carabidae,Amphibia,Anura,Centrolenidae,Colombia,"{Burbano-Yandi, 2018 #1702}",
Insecta,Coleoptera,Carabidae,Reptilia,Squamata,Agamidae,unknown,"{Carpenter, 1966 #2496}","{Mccormick, 1982 #648}"
Insecta,Coleoptera,Carabidae,Reptilia,Squamata,Phrynosomatidae,United States,"{Carpenter, 1966 #2496}","{Mccormick, 1982 #648}"
Insecta,Coleoptera,Carabidae,Amphibia,Anura,Dicroglossidae,Japan,"{Crossland, 2016 #2023}",
Insecta,Coleoptera,Carabidae,Amphibia,Anura,Bufonidae,Israel,"{Elron, 2007 #2021}",
Insecta,Coleoptera,Carabidae,Amphibia,Anura,Bufonidae,Spain,"{Escoriza, 2017 #1851}",
Insecta,Coleoptera,Carabidae,Amphibia,Urodela,Salamandridae,United States,"{Galán, 2007 #2007}",
Insecta,Coleoptera,Carabidae,Amphibia,Urodela,Salamandridae,United States,"{Galán, 2007 #2007}",
Insecta,Coleoptera,Carabidae,Amphibia,Anura,Mantellidae,Madagascar,"{Garcia, 2018 #2219}",
Insecta,Coleoptera,Carabidae,Amphibia,Anura,Bufonidae,Germany,"{Heidelbach,  #1636}",
Insecta,Coleoptera,Carabidae,Amphibia,Anura,Bufonidae,Germany,"{Heidelbach,  #1636}",
Insecta,Coleoptera,Carabidae,Amphibia,Anura,Limnodynastidae,Australia,"{Littlejohn, 1978 #2042}","{Toledo, 2005 #336}"
Insecta,Coleoptera,Carabidae,Reptilia,Squamata,Colubridae,Venezuela,"{Markezich, 1999 #2218}",
Insecta,Coleoptera,Carabidae,Amphibia,Anura,Leptodactylidae,Brazil,"{Oda, 2014 #1753}",
Insecta,Coleoptera,Carabidae,Amphibia,Anura,Leptodactylidae,Brazil,"{Oda, 2014 #1753}",
Insecta,Coleoptera,Carabidae,Amphibia,Urodela,Plethodontidae,Canada,"{Ovaska, 1988 #2043}",
Insecta,Coleoptera,Carabidae,Amphibia,Urodela,Plethodontidae,Canada,"{Ovaska, 1988 #2043}",
Insecta,Coleoptera,Carabidae,Amphibia,Anura,Scaphiopodidae,United States,"{Pomeroy, 1982 #2455}","{Mccormick, 1982 #648}"
Insecta,Coleoptera,Carabidae,Amphibia,Anura,Myobatrachidae,Australia,"{Robertson, 1989 #2020}","{Toledo, 2005 #336}"
Insecta,Coleoptera,Carabidae,Amphibia,Anura,Myobatrachidae,Australia,"{Robertson, 1989 #2020}","{Toledo, 2005 #336}"
Insecta,Coleoptera,Carabidae,Amphibia,Anura,Hyperoliidae,South Africa,"{Scholtz, 2017 #1850}",
Insecta,Coleoptera,Carabidae,Amphibia,Anura,Hyperoliidae,South Africa,"{Scholtz, 2017 #1850}",
Insecta,Coleoptera,Carabidae,Amphibia,Urodela,Ambystomatidae,United States,"{Smith, 1946 #2015}","{Jobe, 2019 #1661}"
Insecta,Coleoptera,Carabidae,Amphibia,Anura,Hylidae,United States,"{Smith, 2002 #2222}",
Insecta,Coleoptera,Carabidae,Amphibia,Urodela,Plethodontidae,United States,"{Tilley, 1972 #2498}","{Mccormick, 1982 #648}"
Insecta,Coleoptera,Carabidae,Amphibia,Anura,Ranidae,Japan,"{Toledo, 2005 #336}","{Toledo, 2005 #336}"
Insecta,Coleoptera,Carabidae,Amphibia,Anura,Ranidae,Japan,"{Toshiaki, 2006 #1849}",
Insecta,Coleoptera,Carabidae,Amphibia,Anura,Bufonidae,Israel,"{Wizen, 2011 #1676}",
Insecta,Coleoptera,Carabidae,Amphibia,Anura,Hylidae,Israel,"{Wizen, 2011 #1676}",
Insecta,Coleoptera,Carabidae,Amphibia,Anura,Ranidae,Israel,"{Wizen, 2011 #1676}",
Insecta,Coleoptera,Carabidae,Amphibia,Anura,Rhacophoridae,India,"{Wizen, 2017 #2225}",
Insecta,Coleoptera,Dytiscidae,Actinopterygii,Cypriniformes,Cyprinidae,Canada,"{Berezina, 1960 #2457}","{Mccormick, 1982 #648}"
Insecta,Coleoptera,Dytiscidae,Actinopterygii,Cypriniformes,Cyprinidae,Canada,"{Berezina, 1960 #2457}","{Mccormick, 1982 #648}"
Insecta,Coleoptera,Dytiscidae,Amphibia,Anura,Bufonidae,United States,"{Brodie, 1978 #306}","{Mccormick, 1982 #648}"
Insecta,Coleoptera,Dytiscidae,Amphibia,Anura,Bufonidae,Australia,"{Cabrera-Guzmán, 2012 #168}",
Insecta,Coleoptera,Dytiscidae,Amphibia,Anura,Hylidae,Australia,"{Cabrera-Guzmán, 2015 #1749}",
Insecta,Coleoptera,Dytiscidae,Amphibia,Anura,Hylidae,Australia,"{Cabrera-Guzmán, 2015 #1749}",
Insecta,Coleoptera,Dytiscidae,Actinopterygii,Atheriniformes,Melanotaeniidae,Australia,"{Cabrera-Guzmán, 2015 #1749}",
Insecta,Coleoptera,Dytiscidae,Amphibia,Anura,Myobatrachidae,Australia,"{Cabrera-Guzmán, 2015 #1749}",
Insecta,Coleoptera,Dytiscidae,Amphibia,Anura,Hylidae,Brazil,"{dos Santos-Silva, 2012 #1748}",
Insecta,Coleoptera,Dytiscidae,Reptilia,Squamata,Colubridae,Brazil,"{Drummond, 1981 #297}",
Insecta,Coleoptera,Dytiscidae,Actinopterygii,Unknown,Unknown,Finland,"{Eriksson, 1972 #2456}","{Mccormick, 1982 #648}"
Insecta,Coleoptera,Dytiscidae,Amphibia,Anura,Ranidae,United States,"{Feldman, 2000 #2046}",
Insecta,Coleoptera,Dytiscidae,Amphibia,Anura,Hylidae,Brazil,"{Gambale, 2014 #1831}",
Insecta,Coleoptera,Dytiscidae,Amphibia,Anura,Hylidae,Brazil,"{Gambale, 2014 #1831}",
Insecta,Coleoptera,Dytiscidae,Amphibia,Anura,Hylidae,Brazil,"{Gambale, 2014 #1831}",
Insecta,Coleoptera,Dytiscidae,Amphibia,Anura,Hylidae,Brazil,"{Gambale, 2014 #1831}",
Insecta,Coleoptera,Dytiscidae,Amphibia,Anura,Leptodactylidae,Brazil,"{Gambale, 2014 #1831}",
Insecta,Coleoptera,Dytiscidae,Amphibia,Anura,Leptodactylidae,Brazil,"{Gambale, 2014 #1831}",
Insecta,Coleoptera,Dytiscidae,Actinopterygii,Cypriniformes,Cyprinidae,India,"{Ganguly, 1961 #2461}","{Mccormick, 1982 #648}"
Insecta,Coleoptera,Dytiscidae,Actinopterygii,Cypriniformes,Cyprinidae,India,"{Ganguly, 1961 #2461}","{Mccormick, 1982 #648}"
Insecta,Coleoptera,Dytiscidae,Actinopterygii,Cypriniformes,Cyprinidae,India,"{Ganguly, 1961 #2461}","{Mccormick, 1982 #648}"
Insecta,Coleoptera,Dytiscidae,Actinopterygii,Cypriniformes,Cyprinidae,India,"{Ganguly, 1961 #2461}","{Mccormick, 1982 #648}"
Insecta,Coleoptera,Dytiscidae,Amphibia,Anura,Myobatrachidae,Australia,"{Gould, 2019 #1604}",
Insecta,Coleoptera,Dytiscidae,Amphibia,Anura,Hylidae,United States,"{Hinshaw, 1990 #2044}",
Insecta,Coleoptera,Dytiscidae,Actinopterygii,Esociformes,Esocidae,unknown,"{Kipling, 1970 #2499}","{Mccormick, 1982 #648}"
Insecta,Coleoptera,Dytiscidae,Reptilia,Squamata,Colubridae,Venezuela,"{Markezich, 1999 #2218}",
Insecta,Coleoptera,Dytiscidae,Amphibia,Anura,Bufonidae,United States,"{Neill, 1948 #2115}","{Mccormick, 1982 #648}"
Insecta,Coleoptera,Dytiscidae,Amphibia,Anura,Hylidae,Brazil,"{Oliveira, 2013 #1794}",
Insecta,Coleoptera,Dytiscidae,Amphibia,Anura,Bufonidae,United States,"{Pearman, 1995 #187}",
Insecta,Coleoptera,Dytiscidae,Amphibia,Anura,Hylidae,United States,"{Pearman, 1995 #187}",
Insecta,Coleoptera,Dytiscidae,Amphibia,Anura,Scaphiopodidae,United States,"{Pomeroy, 1982 #2455}",
Insecta,Coleoptera,Dytiscidae,Actinopterygii,Gasterosteiformes,Gasterosteidae,Canada,"{Reist, 1980 #2488}","{Mccormick, 1982 #648}"
Insecta,Coleoptera,Dytiscidae,Actinopterygii,Gasterosteiformes,Gasterosteidae,Canada,"{Reist, 1980 #2488}","{Mccormick, 1982 #648}"
Insecta,Coleoptera,Dytiscidae,Amphibia,Anura,Ranidae,United States,"{Rubbo, 2006 #253}",
Insecta,Coleoptera,Dytiscidae,Amphibia,Anura,Bufonidae,United States,"{S., 1979 #2509}","{Mccormick, 1982 #648}"
Insecta,Coleoptera,Dytiscidae,Amphibia,Anura,Ranidae,United States,"{S., 1979 #2509}","{Mccormick, 1982 #648}"
Insecta,Coleoptera,Dytiscidae,Actinopterygii,Cypriniformes,Cyprinidae,unknown,"{Shirgur, 1972 #2489}","{Mccormick, 1982 #648}"
Insecta,Coleoptera,Dytiscidae,Amphibia,Anura,Scaphiopodidae,United States,"{Stitt, 2011 #2375}",
Insecta,Coleoptera,Dytiscidae,Amphibia,Anura,Pelobatidae,Spain,"{Tejedo, 1993 #247}",
Insecta,Coleoptera,Dytiscidae,Amphibia,Anura,Bufonidae,Spain,"{Tejedo, 1993 #247}",
Insecta,Coleoptera,Dytiscidae,Amphibia,Anura,Rhacophoridae,Japan,"{Toledo, 2005 #336}","{Toledo, 2005 #336}"
Insecta,Coleoptera,Dytiscidae,Amphibia,Anura,Myobatrachidae,Australia,"{Valdez, 2019 #1602}",
Insecta,Coleoptera,Dytiscidae,Amphibia,Anura,Hylidae,United States,"{Young, 1967 #2500}","{Mccormick, 1982 #648}"
Insecta,Coleoptera,Dytiscidae,Amphibia,Anura,Bufonidae,Brazil,"{Zina, 2012 #2392}",
Insecta,Coleoptera,Dytiscidae,Amphibia,Anura,Leiuperidae,Brazil,"{Zina, 2012 #2392}",
Insecta,Coleoptera,Hydrophilidae,Actinopterygii,Unknown,Unknown,United States,"{Wilson, 1923 #2454}","{Mccormick, 1982 #648}"
Insecta,Coleoptera,Scarabaeidae,Reptilia,Squamata,Lacertidae,unknown,"{Owens, 1959 #2482}","{Mccormick, 1982 #648}"
Insecta,Coleoptera,Scarabaeidae,Amphibia,Anura,Scaphiopodidae,United States,"{Pomeroy, 1982 #2455}","{Mccormick, 1982 #648}"
Insecta,Coleoptera,Staphylinidae,Amphibia,Urodela,Plethodontidae,United States,"{Jung, 2000 #2009}","{Jobe, 2019 #1661}"
Insecta,Coleoptera,Staphylinidae,Reptilia,Squamata,Lacertidae,Spain,"{Recio, 2018 #1703}",
Insecta,Coleoptera,Tenebrionidae,Reptilia,Squamata,Eublepharidae,United States,"{Banta, 1957 #2438}","{Bauer, 1990 #2196}"
Insecta,Coleoptera,Unknown,Amphibia,Anura,Bufonidae,Sri Lanka,"{de Silva, 2009 #1918}",
Insecta,Coleoptera,Unknown,Amphibia,Anura,Ranidae,Sri Lanka,"{de Silva, 2009 #1918}",
Insecta,Diptera,Culicidae,Amphibia,Anura,Dendrobatidae,Peru,"{von May, 2009 #1618}",
Insecta,Diptera,Culicoidea,Amphibia,Anura,Bufonidae,Israel,"{Blaustein, 1994 #1780}",
Insecta,Hemiptera,Belostomatidae,Amphibia,Anura,Hylidae,Brazil,"{Baracho, 2014 #1684}",
Insecta,Hemiptera,Belostomatidae,Amphibia,Anura,Hylidae,Brazil,"{Bastos, 1994 #1792}",
Insecta,Hemiptera,Belostomatidae,Amphibia,Anura,Microhylidae,China,"{Behm, 2016 #2346}",
Insecta,Hemiptera,Belostomatidae,Amphibia,Anura,Hylidae,United States,"{Benard, 2007 #1621}",
Insecta,Hemiptera,Belostomatidae,Amphibia,Anura,Bufonidae,United States,"{Brodie, 1978 #306}","{Mccormick, 1982 #648}"
Insecta,Hemiptera,Belostomatidae,Amphibia,Anura,Hylidae,United States,"{Brodie, 1978 #306}","{Mccormick, 1982 #648}"
Insecta,Hemiptera,Belostomatidae,Amphibia,Anura,Bufonidae,Australia,"{Cabrera-Guzmán, 2012 #168}",
Insecta,Hemiptera,Belostomatidae,Amphibia,Anura,Hylidae,Australia,"{Cabrera-Guzmán, 2012 #168}",
Insecta,Hemiptera,Belostomatidae,Amphibia,Anura,Hylidae,Australia,"{Cabrera-Guzmán, 2015 #1749}",
Insecta,Hemiptera,Belostomatidae,Actinopterygii,Atheriniformes,Melanotaeniidae,Australia,"{Cabrera-Guzmán, 2015 #1749}",
Insecta,Hemiptera,Belostomatidae,Amphibia,Anura,Myobatrachidae,Australia,"{Cabrera-Guzmán, 2015 #1749}",
Insecta,Hemiptera,Belostomatidae,Amphibia,Anura,Hylidae,Brazil,"{Caldas, 2010 #2351}",
Insecta,Hemiptera,Belostomatidae,Amphibia,Anura,Hylidae,Brazil,"{Ceron, 2017 #1789}",
Insecta,Hemiptera,Belostomatidae,Amphibia,Anura,Leptodactylidae,Brazil,"{de Oliveira, 2010 #2299}",
Insecta,Hemiptera,Belostomatidae,Amphibia,Anura,Hylidae,Brazil,"{Dias-Souza, 2019 #2388}",
Insecta,Hemiptera,Belostomatidae,Amphibia,Anura,Hylidae,Brazil,"{Fadel, 2019 #1643}",
Insecta,Hemiptera,Belostomatidae,Amphibia,Anura,Hylidae,Brazil,"{Fadel, 2019 #1643}",
Insecta,Hemiptera,Belostomatidae,Amphibia,Anura,Leptodactylidae,Brazil,"{Fadel, 2019 #1643}",
Insecta,Hemiptera,Belostomatidae,Amphibia,Anura,Leptodactylidae,Brazil,"{Fadel, 2019 #1643}",
Insecta,Hemiptera,Belostomatidae,Amphibia,Anura,Hylidae,Brazil,"{Fadel, 2019 #2200}",
Insecta,Hemiptera,Belostomatidae,Amphibia,Anura,Hylidae,Brazil,"{Fadel, 2019 #2200}",
Insecta,Hemiptera,Belostomatidae,Amphibia,Anura,Leptodactylidae,Brazil,"{Fadel, 2019 #2200}",
Insecta,Hemiptera,Belostomatidae,Amphibia,Anura,Hylidae,Brazil,"{Figueiredo-de-Andrade, 2010 #1652}",
Insecta,Hemiptera,Belostomatidae,Amphibia,Anura,Hylidae,Brazil,"{Gambale, 2014 #1831}",
Insecta,Hemiptera,Belostomatidae,Amphibia,Anura,Hylidae,Brazil,"{Gambale, 2014 #1831}",
Insecta,Hemiptera,Belostomatidae,Amphibia,Anura,Leptodactylidae,Brazil,"{Gambale, 2014 #1831}",
Insecta,Hemiptera,Belostomatidae,Amphibia,Anura,Hylidae,Brazil,"{Garda, 2007 #1938}",
Insecta,Hemiptera,Belostomatidae,Amphibia,Anura,Leptodactylidae,Brazil,"{Giaretta, 2004 #2145}","{Toledo, 2005 #336}"
Insecta,Hemiptera,Belostomatidae,Amphibia,Anura,Hylidae,Uruguay,"{Gobel, 2013 #1653}",
Insecta,Hemiptera,Belostomatidae,Amphibia,Anura,Bufonidae,Costa Rica,"{González-Maya, 2019 #1659}",
Insecta,Hemiptera,Belostomatidae,Reptilia,Testudines,Emydidae,United States,"{Gotte, 1992 #2205}",
Insecta,Hemiptera,Belostomatidae,Reptilia,Testudines,Testudinidae,United States,"{Gotte, 1992 #2229}",
Insecta,Hemiptera,Belostomatidae,Amphibia,Anura,Bufonidae,Brazil,"{Haddad, 1997 #1803}","{Toledo, 2005 #336}"
Insecta,Hemiptera,Belostomatidae,Amphibia,Anura,Hylidae,Colombia,"{Hernández-Cuadrado, 2008 #2306}",
Insecta,Hemiptera,Belostomatidae,Amphibia,Anura,Hylidae,Colombia,"{Hernández-Cuadrado, 2008 #2306}",
Insecta,Hemiptera,Belostomatidae,Amphibia,Anura,Hylidae,Colombia,"{Hernández-Cuadrado, 2008 #2306}",
Insecta,Hemiptera,Belostomatidae,Amphibia,Anura,Bufonidae,Ecuador,"{Heyer, 1973 #2477}","{Mccormick, 1982 #648}"
Insecta,Hemiptera,Belostomatidae,Amphibia,Anura,Hylidae,Ecuador,"{Heyer, 1973 #2477}","{Mccormick, 1982 #648}"
Insecta,Hemiptera,Belostomatidae,Amphibia,Anura,Leptodactylidae,Ecuador,"{Heyer, 1973 #2477}","{Mccormick, 1982 #648}"
Insecta,Hemiptera,Belostomatidae,Amphibia,Anura,Rhacophoridae,Japan,"{Hirai, 2002 #2108}","{Toledo, 2005 #336}"
Insecta,Hemiptera,Belostomatidae,Amphibia,Anura,Ranidae,Japan,"{Hirai, 2002 #2108}","{Toledo, 2005 #336}"
Insecta,Hemiptera,Belostomatidae,Amphibia,Anura,Ranidae,Japan,"{Hirai, 2002 #2108}","{Toledo, 2005 #336}"
Insecta,Hemiptera,Belostomatidae,Amphibia,Anura,Leptodactylidae,Argentina,"{Iglesia, 2011 #2359}",
Insecta,Hemiptera,Belostomatidae,Amphibia,Anura,Hylidae,Brazil,"{Ivan, 1993 #1805}",
Insecta,Hemiptera,Belostomatidae,Amphibia,Urodela,Salamandridae,United States,"{Jensen, 2017 #2008}","{Jobe, 2019 #1661}"
Insecta,Hemiptera,Belostomatidae,Amphibia,Anura,Hylidae,Brazil,"{Kopp, 2006 #348}",
Insecta,Hemiptera,Belostomatidae,Amphibia,Anura,Hylidae,Brazil,"{Kopp, 2006 #348}",
Insecta,Hemiptera,Belostomatidae,Amphibia,Anura,Ranidae,United States,"{Leidy, 2019 #2390}",
Insecta,Hemiptera,Belostomatidae,Amphibia,Anura,Bufonidae,Mexico,"{Luja, 2008 #2354}",
Insecta,Hemiptera,Belostomatidae,Amphibia,Anura,Hylidae,Brazil,"{Maffei, 2014 #1647}",
Insecta,Hemiptera,Belostomatidae,Amphibia,Anura,Bufonidae,United States,"{McCoy, 2003 #2126}","{Toledo, 2005 #336}"
Insecta,Hemiptera,Belostomatidae,Amphibia,Anura,Hylidae,Japan,"{Menin, 2005 #1777}","{Toledo, 2005 #336}"
Insecta,Hemiptera,Belostomatidae,Amphibia,Anura,Hylidae,Venezuela,"{Mijares-Urrutia, 1997 #2206}","{Toledo, 2005 #336}"
Insecta,Hemiptera,Belostomatidae,Reptilia,Testudines,Kinosternidae,United States,"{Mitchell, 2011 #2358}",
Insecta,Hemiptera,Belostomatidae,Amphibia,Anura,Hylidae,United States,"{Mitchell, 2013 #2357}",
Insecta,Hemiptera,Belostomatidae,Amphibia,Anura,Ranidae,United States,"{Nauman, 1999 #2114}","{Toledo, 2005 #336}"
Insecta,Hemiptera,Belostomatidae,Amphibia,Anura,Leptodactylidae,Argentina,"{Nenda, 2008 #2353}",
Insecta,Hemiptera,Belostomatidae,Reptilia,Testudines,Geoemydidae,Japan,"{Ohba, 2011 #1674}",
Insecta,Hemiptera,Belostomatidae,Reptilia,Squamata,Acrochordidae,United States,"{Wilson, 1958 #2570}","{Ohba, 2019 #338}"
Insecta,Hemiptera,Belostomatidae,Aves,Unknown,Unknown,United States,"{Hungerford, 1919 #2569}","{Ohba, 2019 #338}"
Insecta,Hemiptera,Belostomatidae,Aves,Unknown,Unknown,United States,"{Menke, 1979 #2568}","{Ohba, 2019 #338}"
Insecta,Hemiptera,Belostomatidae,Reptilia,Squamata,Colubridae,Japan,"{Mori, 2004 #2571}","{Ohba, 2019 #338}"
Insecta,Hemiptera,Belostomatidae,Reptilia,Squamata,Colubridae,Japan,"{Mori, 2004 #2571}","{Ohba, 2019 #338}"
Insecta,Hemiptera,Belostomatidae,Reptilia,Squamata,Viperidae,Japan,"{Ohba, 2012 #2572}","{Ohba, 2019 #338}"
Insecta,Hemiptera,Belostomatidae,Actinopterygii,Cypriniformes,Unknown,Japan,"{Ohba, 2019 #338}",
Insecta,Hemiptera,Belostomatidae,Amphibia,Anura,Unknown,Japan,"{Ohba, 2019 #338}",
Insecta,Hemiptera,Belostomatidae,Amphibia,Anura,Unknown,Japan,"{Ohba, 2019 #338}",
Insecta,Hemiptera,Belostomatidae,Actinopterygii,Unknown,Unknown,Japan,"{Ohba, 2019 #338}",
Insecta,Hemiptera,Belostomatidae,Amphibia,Anura,Unknown,United States,"{Pennak, 1978 #2497}","{Mccormick, 1982 #648}"
Insecta,Hemiptera,Belostomatidae,Actinopterygii,Unknown,Unknown,United States,"{Pennak, 1978 #2497}","{Mccormick, 1982 #648}"
Insecta,Hemiptera,Belostomatidae,Amphibia,Anura,Hylidae,Mexico,"{Pineda, 2003 #2117}","{Toledo, 2005 #336}"
Insecta,Hemiptera,Belostomatidae,Amphibia,Anura,Hylidae,Brazil,"{Pombal Jr, 2007 #2389}",
Insecta,Hemiptera,Belostomatidae,Amphibia,Anura,Hylidae,Brazil,"{Pombal Jr, 2007 #2389}",
Insecta,Hemiptera,Belostomatidae,Actinopterygii,Gasterosteiformes,Gasterosteidae,Canada,"{Reist, 1980 #2488}","{Mccormick, 1982 #648}"
Insecta,Hemiptera,Belostomatidae,Amphibia,Anura,Hylidae,Brazil,"{Rocha, 2014 #1657}",
Insecta,Hemiptera,Belostomatidae,Actinopterygii,Cypriniformes,Cyprinidae,United States,"{Rondinelli, 1993 #2450}",
Insecta,Hemiptera,Belostomatidae,Amphibia,Anura,Hylidae,Peru,"{Rudolf von May, 2019 #252}",
Insecta,Hemiptera,Belostomatidae,Amphibia,Anura,Hylidae,Mexico,"{Salinas, 2012 #2356}",
Insecta,Hemiptera,Belostomatidae,Amphibia,Anura,Leptodactylidae,Bolivia,"{Schalk, 2010 #2352}",
Insecta,Hemiptera,Belostomatidae,Amphibia,Anura,Hylidae,Brazil,"{Serrano, 2019 #1742}",
Insecta,Hemiptera,Belostomatidae,Actinopterygii,Cypriniformes,Cyprinidae,unknown,"{Shirgur, 1972 #2489}","{Mccormick, 1982 #648}"
Insecta,Hemiptera,Belostomatidae,Actinopterygii,Cypriniformes,Cyprinidae,unknown,"{Shirgur, 1972 #2489}","{Mccormick, 1982 #648}"
Insecta,Hemiptera,Belostomatidae,Amphibia,Anura,Bufonidae,Brazil,"{Silva, 2017 #2350}",
Insecta,Hemiptera,Belostomatidae,Reptilia,Squamata,Acrochordidae,unknown,"{Smith, 1980 #2436}","{Mccormick, 1982 #648}"
Insecta,Hemiptera,Belostomatidae,Aves,Charadriidae,Charadriidae,unknown,"{Smith, 1980 #2436}","{Mccormick, 1982 #648}"
Insecta,Hemiptera,Belostomatidae,Actinopterygii,Unknown,Unknown,unknown,"{Smith, 1980 #2436}","{Mccormick, 1982 #648}"
Insecta,Hemiptera,Belostomatidae,Amphibia,Anura,Unknown,unknown,"{Smith, 1980 #2436}","{Mccormick, 1982 #648}"
Insecta,Hemiptera,Belostomatidae,Amphibia,Anura,Hylidae,Argentina,"{Taffarel, 2019 #1630}",
Insecta,Hemiptera,Belostomatidae,Amphibia,Anura,Hylidae,Argentina,"{Taffarel, 2019 #1630}",
Insecta,Hemiptera,Belostomatidae,Amphibia,Anura,Hylidae,Argentina,"{Taffarel, 2019 #1630}",
Insecta,Hemiptera,Belostomatidae,Amphibia,Anura,Hylidae,Argentina,"{Taffarel, 2019 #1630}",
Insecta,Hemiptera,Belostomatidae,Amphibia,Anura,Hylidae,Argentina,"{Taffarel, 2019 #1630}",
Insecta,Hemiptera,Belostomatidae,Amphibia,Anura,Hylidae,Argentina,"{Taffarel, 2019 #1630}",
Insecta,Hemiptera,Belostomatidae,Amphibia,Anura,Leptodactylidae,Argentina,"{Taffarel, 2019 #1630}",
Insecta,Hemiptera,Belostomatidae,Amphibia,Anura,Leptodactylidae,Argentina,"{Taffarel, 2019 #1630}",
Insecta,Hemiptera,Belostomatidae,Amphibia,Anura,Leptodactylidae,Argentina,"{Taffarel, 2019 #1630}",
Insecta,Hemiptera,Belostomatidae,Amphibia,Anura,Leptodactylidae,Argentina,"{Taffarel, 2019 #1630}",
Insecta,Hemiptera,Belostomatidae,Actinopterygii,Cyprinodontiformes,Poeciliidae,Mexico,"{Tobler, 2007 #2419}",
Insecta,Hemiptera,Belostomatidae,Amphibia,Anura,Hylidae,Brazil,"{Toledo, 2003 #1800}","{Toledo, 2005 #336}"
Insecta,Hemiptera,Belostomatidae,Amphibia,Anura,Hylidae,Brazil,"{Toledo, 2003 #1800}","{Toledo, 2005 #336}"
Insecta,Hemiptera,Belostomatidae,Amphibia,Anura,Hylidae,Brazil,"{Toledo, 2003 #1800}","{Toledo, 2005 #336}"
Insecta,Hemiptera,Belostomatidae,Amphibia,Anura,Hylidae,Brazil,"{Toledo, 2003 #1800}","{Toledo, 2005 #336}"
Insecta,Hemiptera,Belostomatidae,Amphibia,Anura,Leptodactylidae,Brazil,"{Toledo, 2003 #1800}","{Toledo, 2005 #336}"
Insecta,Hemiptera,Belostomatidae,Amphibia,Anura,Leptodactylidae,Brazil,"{Toledo, 2003 #1800}","{Toledo, 2005 #336}"
Insecta,Hemiptera,Belostomatidae,Amphibia,Anura,Leptodactylidae,Brazil,"{Toledo, 2003 #1800}","{Toledo, 2005 #336}"
Insecta,Hemiptera,Belostomatidae,Amphibia,Anura,Hylidae,Brazil,"{Toledo, 2005 #336}","{Toledo, 2005 #336}"
Insecta,Hemiptera,Belostomatidae,Amphibia,Anura,Hylidae,Brazil,"{Toledo, 2005 #336}","{Toledo, 2005 #336}"
Insecta,Hemiptera,Belostomatidae,Amphibia,Anura,Hylidae,Japan,"{Toledo, 2005 #336}","{Toledo, 2005 #336}"
Insecta,Hemiptera,Belostomatidae,Amphibia,Anura,Ranidae,Japan,"{Toledo, 2005 #336}","{Toledo, 2005 #336}"
Insecta,Hemiptera,Belostomatidae,Amphibia,Anura,Ranidae,Japan,"{Toledo, 2005 #336}","{Toledo, 2005 #336}"
Insecta,Hemiptera,Belostomatidae,Amphibia,Anura,Microhylidae,Brazil,"{Yves, 2018 #1627}",
Insecta,Hemiptera,Belostomatidae,Amphibia,Anura,Microhylidae,Argentina,"{Zaracho, 2012 #1629}",
Insecta,Hemiptera,Corixidae,Actinopterygii,Unknown,Unknown,unknown,"{Mills, 1967 #2494}","{Mccormick, 1982 #648}"
Insecta,Hemiptera,Nepidae,Actinopterygii,Cypriniformes,Cyprinidae,India,"{Ganguly, 1961 #2461}","{Mccormick, 1982 #648}"
Insecta,Hemiptera,Nepidae,Actinopterygii,Cypriniformes,Cyprinidae,India,"{Ganguly, 1961 #2461}","{Mccormick, 1982 #648}"
Insecta,Hemiptera,Nepidae,Actinopterygii,Gasterosteiformes,Gasterosteidae,Canada,"{Reist, 1980 #2488}","{Mccormick, 1982 #648}"
Insecta,Hemiptera,Nepidae,Actinopterygii,Cypriniformes,Cyprinidae,unknown,"{Shirgur, 1972 #2489}","{Mccormick, 1982 #648}"
Insecta,Hemiptera,Nepidae,Amphibia,Anura,Hylidae,Japan,"{Toledo, 2005 #336}","{Toledo, 2005 #336}"
Insecta,Hemiptera,Nepidae,Amphibia,Anura,Rhacophoridae,Japan,"{Toledo, 2005 #336}","{Toledo, 2005 #336}"
Insecta,Hemiptera,Nepidae,Amphibia,Unknown,Unknown,South Africa,"{Wager, 1986 #2468}","{Mccormick, 1982 #648}"
Insecta,Hemiptera,Nepidae,Amphibia,Unknown,Unknown,South Africa,"{Wager, 1986 #2468}","{Mccormick, 1982 #648}"
Insecta,Hemiptera,Notonectidae,Actinopterygii,Cypriniformes,Cyprinidae,Canada,"{Berezina, 1960 #2457}","{Mccormick, 1982 #648}"
Insecta,Hemiptera,Notonectidae,Actinopterygii,Unknown,Unknown,India,"{Julka, 1965 #2495}","{Mccormick, 1982 #648}"
Insecta,Hemiptera,Notonectidae,Amphibia,Anura,Scaphiopodidae,United States,"{Pomeroy, 1982 #2455}","{Mccormick, 1982 #648}"
Insecta,Hemiptera,Notonectidae,Actinopterygii,Gasterosteiformes,Gasterosteidae,Canada,"{Reist, 1980 #2488}","{Mccormick, 1982 #648}"
Insecta,Hemiptera,Notonectidae,Actinopterygii,Cypriniformes,Cyprinidae,unknown,"{Shirgur, 1972 #2489}","{Mccormick, 1982 #648}"
Insecta,Hemiptera,Notonectidae,Actinopterygii,Cypriniformes,Cyprinidae,unknown,"{Shirgur, 1972 #2489}","{Mccormick, 1982 #648}"
Insecta,Hemiptera,Notonectidae,Actinopterygii,Cypriniformes,Cyprinidae,unknown,"{Shirgur, 1972 #2489}","{Mccormick, 1982 #648}"
Insecta,Hemiptera,Tabanidae,Amphibia,Anura,Pelobatidae,United States,"{Jackman, 1983 #2112}","{Toledo, 2005 #336}"
Insecta,Hymenoptera,Formicidae,Reptilia,Squamata,Sphaerodactylidae,Brazil,"{Albuquerque, 2019 #1897}",
Insecta,Hymenoptera,Formicidae,Aves,Passeriformes,Tyrannidae,Brazil,"{Bichinski, 2015 #1952}",
Insecta,Hymenoptera,Formicidae,Reptilia,Testudines,Testudinidae,United States,"{Boone, 1999 #2213}",
Insecta,Hymenoptera,Formicidae,Reptilia,Testudines,Emydidae,United States,"{BUHLMANN, 2001 #2167}",
Insecta,Hymenoptera,Formicidae,Aves,Passeriformes,Vireonidae,United States,"{Campomizzi, 2009 #2193}",
Insecta,Hymenoptera,Formicidae,Amphibia,Anura,Bufonidae,Brazil,"{Campos Gomides, 2011 #2347}",
Insecta,Hymenoptera,Formicidae,Reptilia,Crocodilia,Alligatoridae,Brazil,"{Cintra, 1985 #2160}",
Insecta,Hymenoptera,Formicidae,Amphibia,Anura,Bufonidae,Australia,"{Clerke, 1992 #1811}","{Toledo, 2005 #336}"
Insecta,Hymenoptera,Formicidae,Reptilia,Testudines,Chelydridae,United States,"{Conners, 1998 #2179}",
Insecta,Hymenoptera,Formicidae,Aves,Galliformes,Odontophoridae,United States,"{Dabbert, 2002 #2187}",
Insecta,Hymenoptera,Formicidae,Aves,Falconiformes,‎Falconidae,United States,"{Dickinson, 1995 #2189}",
Insecta,Hymenoptera,Formicidae,Aves,Unknown,Unknown,United States,"{Drees, 1994 #2173}",
Insecta,Hymenoptera,Formicidae,Amphibia,Anura,Eleutherodactylidae,Costa Rica,"{Eisenberg, 2007 #2348}",
Insecta,Hymenoptera,Formicidae,Reptilia,Testudines,Testudinidae,United States,"{Epperson, 2003 #2154}",
Insecta,Hymenoptera,Formicidae,Reptilia,Testudines,Podocnemididae,Brazil,"{Erickson, 2016 #2162}",
Insecta,Hymenoptera,Formicidae,Mammalia,Rodentia,Cricetidae,United States,"{Flickinger, 1989 #2172}",
Insecta,Hymenoptera,Formicidae,Amphibia,Urodela,Plethodontidae,United States,"{Forester, 1979 #2010}","{Jobe, 2019 #1661}"
Insecta,Hymenoptera,Formicidae,Amphibia,Anura,Dendrobatidae,Costa Rica,"{Fritz, 1981 #2116}","{Toledo, 2005 #336}"
Insecta,Hymenoptera,Formicidae,Amphibia,Anura,Leptodactylidae,Costa Rica,"{Fritz, 1981 #2116}","{Toledo, 2005 #336}"
Insecta,Hymenoptera,Formicidae,Aves,Apodiformes,Trochilidae,Canada,"{Grant, 1959 #2017}","{Mccormick, 1982 #648}"
Insecta,Hymenoptera,Formicidae,Aves,Apodiformes,Trochilidae,Canada,"{Grant, 1959 #2017}","{Mccormick, 1982 #648}"
Insecta,Hymenoptera,Formicidae,Reptilia,Squamata,Viperidae,United States,"{Graves, 1989 #2057}",
Insecta,Hymenoptera,Formicidae,Reptilia,Squamata,Sphaerodactylidae,Brazil,"{Gurgel de SoUnited States, 2010 #2406}","{Schalk, 2018 #1732}"
Insecta,Hymenoptera,Formicidae,Mammalia,Lagomorpha,Leporidae,United States,"{Hill, 1969 #2177}","{Mccormick, 1982 #648}"
Insecta,Hymenoptera,Formicidae,Reptilia,Testudines,Cheloniidae,United States,"{Holbrook, 2019 #2168}",
Insecta,Hymenoptera,Formicidae,Amphibia,Gymnophiona,Ichthyophiidae,Vietnam,"{Jestrzemski, 2016 #1696}",
Insecta,Hymenoptera,Formicidae,Amphibia,Gymnophiona,Ichthyophiidae,Vietnam,"{Jestrzemski, 2016 #1696}",
Insecta,Hymenoptera,Formicidae,Aves,Passeriformes,Hirundinidae,United States,"{Kopachena, 2000 #2188}",
Insecta,Hymenoptera,Formicidae,Reptilia,Testudines,Cheloniidae,United States,"{Krahe, 2005 #2156}",
Insecta,Hymenoptera,Formicidae,Reptilia,Testudines,Cheloniidae,United States,"{Krahe, 2005 #2156}",
Insecta,Hymenoptera,Formicidae,Aves,Charadriiformes,Laridae,United States,"{Krogh, 1999 #2186}",
Insecta,Hymenoptera,Formicidae,Reptilia,Testudines,Testudinidae,United States,"{Landers, 1980 #2178}",
Insecta,Hymenoptera,Formicidae,Aves,Gruiformes,Rallidae,United States,"{Legare, 2001 #2190}",
Insecta,Hymenoptera,Formicidae,Aves,Charadriiformes,Laridae,United States,"{Lockley, 1995 #2185}",
Insecta,Hymenoptera,Formicidae,Reptilia,Crocodilia,Alligatoridae,Argentina,"{Marcó, 2015 #2163}",
Insecta,Hymenoptera,Formicidae,Mammalia,Rodentia,Cricetidae,United States,"{Masser, 1986 #2183}",
Insecta,Hymenoptera,Formicidae,Mammalia,Rodentia,Cricetidae,United States,"{Masser, 1986 #2183}",
Insecta,Hymenoptera,Formicidae,Mammalia,Rodentia,muridae,United States,"{Masser, 1986 #2183}",
Insecta,Hymenoptera,Formicidae,Mammalia,Rodentia,muridae,United States,"{Masser, 1986 #2183}",
Insecta,Hymenoptera,Formicidae,Reptilia,Squamata,Gekkonidae,United States,"{McCallum, 2006 #2214}",
Insecta,Hymenoptera,Formicidae,Reptilia,Squamata,Colubridae,United States,"{Mccormick, 1982 #648}","{Mccormick, 1982 #648}"
Insecta,Hymenoptera,Formicidae,Reptilia,Testudines,Emydidae,United States,"{Montgomery, 1996 #2164}",
Insecta,Hymenoptera,Formicidae,Aves,Columbiformes,Columbidae,virgin islands,"{Nellis, 1984 #1943}","{Menezes, 2017 #1824}"
Insecta,Hymenoptera,Formicidae,Amphibia,Anura,Bufonidae,United States,"{P. S. Freed, 1998 #2181}",
Insecta,Hymenoptera,Formicidae,Reptilia,Testudines,Cheloniidae,United States,"{Parris, 2002 #2157}",
Insecta,Hymenoptera,Formicidae,Aves,Passeriformes,Vireonidae,United States,"{Peterson, 2004 #1956}","{Menezes, 2017 #1824}"
Insecta,Hymenoptera,Formicidae,Aves,Passeriformes,Fringillidae,Brazil,"{Pizo, 2000 #1953}","{Menezes, 2017 #1824}"
Insecta,Hymenoptera,Formicidae,Aves,Galliformes,Odontophoridae,United States,"{Rader, 2007 #1958}","{Menezes, 2017 #1824}"
Insecta,Hymenoptera,Formicidae,Reptilia,Crocodilia,Alligatoridae,United States,"{Reagan, 2000 #2166}",
Insecta,Hymenoptera,Formicidae,Aves,Anseriformes,Anatidae,United States,"{Ridlehuber, 1982 #2165}",
Insecta,Hymenoptera,Formicidae,Aves,Passeriformes,Thamnophilidae,Panama,"{Robinson, 2001 #2170}",
Insecta,Hymenoptera,Formicidae,Reptilia,Squamata,Gekkonidae,South Africa,"{Rose, 1962 #2514}","{Bauer, 1990 #2196}"
Insecta,Hymenoptera,Formicidae,Mammalia,Primates,Cercopithecidae,West Africa,"{Savage, 1847 #2469}","{Mccormick, 1982 #648}"
Insecta,Hymenoptera,Formicidae,Reptilia,Squamata,Iguanidae,West Africa,"{Savage, 1847 #2469}","{Mccormick, 1982 #648}"
Insecta,Hymenoptera,Formicidae,Reptilia,Squamata,Pythonidae,West Africa,"{Savage, 1847 #2469}","{Mccormick, 1982 #648}"
Insecta,Hymenoptera,Formicidae,Mammalia,Artiodactyla,Suidae,West Africa,"{Savage, 1847 #2469}","{Mccormick, 1982 #648}"
Insecta,Hymenoptera,Formicidae,Aves,Galliformes,Unknown,West Africa,"{Savage, 1847 #2469}","{Mccormick, 1982 #648}"
Insecta,Hymenoptera,Formicidae,Reptilia,Squamata,Gekkonidae,Brazil,"{Sazima, 2015 #2408}","{Schalk, 2018 #1732}"
Insecta,Hymenoptera,Formicidae,Reptilia,Squamata,Colubridae,Brazil,"{Sazima, 2015 #2408}",
Insecta,Hymenoptera,Formicidae,Amphibia,Anura,Leptodactylidae,Bolivia,"{Senzano, 2013 #2349}",
Insecta,Hymenoptera,Formicidae,Aves,Passeriformes,Hirundinidae,United States,"{Sikes, 1986 #2176}",
Insecta,Hymenoptera,Formicidae,Aves,Passeriformes,Vireonidae,United States,"{Smith, 2004 #2161}",
Insecta,Hymenoptera,Formicidae,Reptilia,Testudines,Testudinidae,United States,"{Smith, 2013 #2155}",
Insecta,Hymenoptera,Formicidae,Aves,Passeriformes,Vireonidae,United States,"{Stake, 2003 #2171}",
Insecta,Hymenoptera,Formicidae,Aves,Passeriformes,Parulidae,United States,"{Stake, 2004 #1957}","{Menezes, 2017 #1824}"
Insecta,Hymenoptera,Formicidae,Aves,Passeriformes,Timaliidae,South Africa,"{STEYN, 1967 #2501}","{Mccormick, 1982 #648}"
Insecta,Hymenoptera,Formicidae,Amphibia,Anura,Bufonidae,United States,"{Thomas, 1997 #2120}","{Toledo, 2005 #336}"
Insecta,Hymenoptera,Formicidae,Aves,Galliformes,Odontophoridae,United States,"{Wilson, 1988 #2192}",
Insecta,Hymenoptera,Formicidae,Aves,Galliformes,Phasianidae,United States,"{Wilson, 1988 #2192}",
Insecta,Hymenoptera,Formicidae,Aves,Passeriformes,Tyrannidae,United States,"{Wilson, 1988 #2192}",
Insecta,Hymenoptera,Formicidae,Reptilia,Squamata,Gekkonidae,Malaysia,"{Wuertz, 2006 #2210}",
Insecta,Hymenoptera,Formicidae,Amphibia,Anura,Bufonidae,Italy,"{Zuffi, 2001 #2119}","{Toledo, 2005 #336}"
Insecta,Hymenoptera,Formicidae,Aves,Apodiformes,Apodidae,India,"{Manchi, 2009 #2562}",
Insecta,Hymenoptera,Vespidae,Aves,Apodiformes,Trochilidae,Canada,"{Grant, 1959 #2017}",
Insecta,Hymenoptera,Vespidae,Aves,Passeriformes,Prunellidae,New Zealand,"{Moller, 1990 #2018}",
Insecta,Mantodea,Mantidae,Aves,Apodiformes,Trochilidae,United States,"{ALEXANDER, 1888 #2543}","{Nyffeler, 2017 #1971}"
Insecta,Mantodea,Mantidae,Aves,Apodiformes,Trochilidae,United States,"{ALLEN, 1961 #2536}","{Nyffeler, 2017 #1971}"
Insecta,Mantodea,Mantidae,Aves,Apodiformes,Trochilidae,United States,"{ALLEN, 1961 #2536}","{Nyffeler, 2017 #1971}"
Insecta,Mantodea,Mantidae,Actinopterygii,Cypriniformes,Cyprinidae,India,"{Battiston, 2018 #1727}",
Insecta,Mantodea,Mantidae,Actinopterygii,Siluriformes,Loricariidae,India,"{Battiston, 2018 #1727}",
Insecta,Mantodea,Mantidae,Actinopterygii,Cyprinodontiformes,Poeciliidae,India,"{Battiston, 2018 #1727}",
Insecta,Mantodea,Mantidae,Aves,Unknown,Unknown,Angola,"{Beier, 1969 #2530}","{Nyffeler, 2017 #1971}"
Insecta,Mantodea,Mantidae,Aves,Passeriformes,Acrocephalidae,Spain,"{BIGAS, 2006 #1818}","{Nyffeler, 2017 #1971}"
Insecta,Mantodea,Mantidae,Aves,Passeriformes,Muscicapidae,Spain,"{BIGAS, 2006 #1818}","{Nyffeler, 2017 #1971}"
Insecta,Mantodea,Mantidae,Aves,Passeriformes,Muscicapidae,Spain,"{BIGAS, 2006 #1818}","{Nyffeler, 2017 #1971}"
Insecta,Mantodea,Mantidae,Aves,Passeriformes,Muscicapidae,Spain,"{BIGAS, 2006 #1818}","{Nyffeler, 2017 #1971}"
Insecta,Mantodea,Mantidae,Aves,Passeriformes,Muscicapidae,Spain,"{BIGAS, 2006 #1818}","{Nyffeler, 2017 #1971}"
Insecta,Mantodea,Mantidae,Aves,Passeriformes,Muscicapidae,Spain,"{BIGAS, 2006 #1818}","{Nyffeler, 2017 #1971}"
Insecta,Mantodea,Mantidae,Aves,Passeriformes,Muscicapidae,Spain,"{BIGAS, 2006 #1818}","{Nyffeler, 2017 #1971}"
Insecta,Mantodea,Mantidae,Aves,Passeriformes,Muscicapidae,Spain,"{BIGAS, 2006 #1818}","{Nyffeler, 2017 #1971}"
Insecta,Mantodea,Mantidae,Aves,Passeriformes,Muscicapidae,Spain,"{BIGAS, 2006 #1818}","{Nyffeler, 2017 #1971}"
Insecta,Mantodea,Mantidae,Aves,Passeriformes,Muscicapidae,Spain,"{BIGAS, 2006 #1818}","{Nyffeler, 2017 #1971}"
Insecta,Mantodea,Mantidae,Aves,Passeriformes,Muscicapidae,Spain,"{BIGAS, 2006 #1818}","{Nyffeler, 2017 #1971}"
Insecta,Mantodea,Mantidae,Aves,Passeriformes,Phylloscopidae,Spain,"{BIGAS, 2006 #1818}","{Nyffeler, 2017 #1971}"
Insecta,Mantodea,Mantidae,Aves,Passeriformes,Phylloscopidae,Spain,"{BIGAS, 2006 #1818}","{Nyffeler, 2017 #1971}"
Insecta,Mantodea,Mantidae,Aves,Passeriformes,Scotocercidae,Spain,"{BIGAS, 2006 #1818}","{Nyffeler, 2017 #1971}"
Insecta,Mantodea,Mantidae,Aves,Passeriformes,Scotocercidae,Spain,"{BIGAS, 2006 #1818}","{Nyffeler, 2017 #1971}"
Insecta,Mantodea,Mantidae,Aves,Passeriformes,Scotocercidae,Spain,"{BIGAS, 2006 #1818}","{Nyffeler, 2017 #1971}"
Insecta,Mantodea,Mantidae,Aves,Apodiformes,Trochilidae,Trinidad and Tobago,"{Bridges, 1988 #2532}","{Nyffeler, 2017 #1971}"
Insecta,Mantodea,Mantidae,Reptilia,Squamata,Phrynosomatidae,United States,"{Brothers, 2008 #2416}","{Schalk, 2018 #1732}"
Insecta,Mantodea,Mantidae,Aves,Passeriformes,Nectariniidae,India,"{Browne, 1899 #2101}","{Nyffeler, 2017 #1971}"
Insecta,Mantodea,Mantidae,Aves,Passeriformes,Tyrannidae,Argentina,"{Burmeister, 1864 #2106}","{Nyffeler, 2017 #1971}"
Insecta,Mantodea,Mantidae,Aves,Apodiformes,Trochilidae,unknown,"{Butler, 1949 #2452}","{Mccormick, 1982 #648}"
Insecta,Mantodea,Mantidae,Amphibia,Urodela,Plethodontidae,Mexico,"{Buttenhoff, 1995 #2006}","{Jobe, 2019 #1661}"
Insecta,Mantodea,Mantidae,Aves,Apodiformes,Trochilidae,United States,"{Carignan, 1988 #1991}","{Nyffeler, 2017 #1971}"
Insecta,Mantodea,Mantidae,Aves,Apodiformes,Trochilidae,United States,"{CONWAY, 1992 #2537}","{Nyffeler, 2017 #1971}"
Insecta,Mantodea,Mantidae,Aves,Passeriformes,Acrocephalidae,Spain,"{Copete, 2006 #1818}",
Insecta,Mantodea,Mantidae,Aves,Passeriformes,Cettiidae,Spain,"{Copete, 2006 #1818}",
Insecta,Mantodea,Mantidae,Aves,Passeriformes,Muscicapidae,Spain,"{Copete, 2006 #1818}",
Insecta,Mantodea,Mantidae,Aves,Passeriformes,Muscicapidae,Spain,"{Copete, 2006 #1818}",
Insecta,Mantodea,Mantidae,Aves,Passeriformes,Muscicapidae,Spain,"{Copete, 2006 #1818}",
Insecta,Mantodea,Mantidae,Aves,Passeriformes,Muscicapidae,Spain,"{Copete, 2006 #1818}",
Insecta,Mantodea,Mantidae,Aves,Passeriformes,Phylloscopidae,Spain,"{Copete, 2006 #1818}",
Insecta,Mantodea,Mantidae,Amphibia,Anura,Hylidae,Brazil,"{Costa-Pereira, 2010 #1848}",
Insecta,Mantodea,Mantidae,Aves,Passeriformes,Maluridae,Australia,"{Dale, 2005 #2100}","{Nyffeler, 2017 #1971}"
Insecta,Mantodea,Mantidae,Amphibia,Anura,Hylidae,Australia,"{Dale, 2005 #2100}",
Insecta,Mantodea,Mantidae,Aves,Apodiformes,Trochilidae,United States,"{Edwards, 1934 #2535}","{Nyffeler, 2017 #1971}"
Insecta,Mantodea,Mantidae,Aves,Apodiformes,Trochilidae,United States,"{Fisher Jr, 1994 #2105}","{Nyffeler, 2017 #1971}"
Insecta,Mantodea,Mantidae,Reptilia,Squamata,Lacertidae,Spain,"{García, 1998 #2546}",
Insecta,Mantodea,Mantidae,Aves,Apodiformes,Trochilidae,United States,"{Hildebrand, 1949 #1813}",
Insecta,Mantodea,Mantidae,Reptilia,Squamata,Lacertidae,Hungary,"{Jehle, 1996 #2199}",
Insecta,Mantodea,Mantidae,Aves,Apodiformes,Trochilidae,United States,"{KESTERSON, 1999 #2538}","{Nyffeler, 2017 #1971}"
Insecta,Mantodea,Mantidae,Reptilia,Squamata,Gekkonidae,Hawaii,"{La Rivers, 1948 #2418}","{Schalk, 2018 #1732}"
Insecta,Mantodea,Mantidae,Aves,Apodiformes,Trochilidae,United States,"{Laurent, 1933 #2104}","{Nyffeler, 2017 #1971}"
Insecta,Mantodea,Mantidae,Aves,Passeriformes,Vireonidae,United States,"{LAURO, 1976 #2531}","{Nyffeler, 2017 #1971}"
Insecta,Mantodea,Mantidae,Aves,Apodiformes,Trochilidae,United States,"{Lorenz, 2007 #2103}","{Nyffeler, 2017 #1971}"
Insecta,Mantodea,Mantidae,Aves,Passeriformes,Acanthizidae,Australia,"{Morse, 1922 #2098}","{Nyffeler, 2017 #1971}"
Insecta,Mantodea,Mantidae,Aves,Passeriformes,Acanthizidae,Australia,"{Morse, 1922 #2098}","{Nyffeler, 2017 #1971}"
Insecta,Mantodea,Mantidae,Aves,Passeriformes,Acanthizidae,Australia,"{Morse, 1922 #2098}","{Nyffeler, 2017 #1971}"
Insecta,Mantodea,Mantidae,Aves,Passeriformes,Acanthizidae,Australia,"{Morse, 1922 #2098}","{Nyffeler, 2017 #1971}"
Insecta,Mantodea,Mantidae,Aves,Apodiformes,Trochilidae,United States,"{Murray, 1958 #2540}","{Nyffeler, 2017 #1971}"
Insecta,Mantodea,Mantidae,Amphibia,Anura,Hylidae,Australia,"{Nordberg, 2018 #182}",
Insecta,Mantodea,Mantidae,Aves,Apodiformes,Trochilidae,Canada,"{Nyffeler, 2017 #1971}","{Nyffeler, 2017 #1971}"
Insecta,Mantodea,Mantidae,Aves,Apodiformes,Trochilidae,Panama,"{Nyffeler, 2017 #1971}","{Nyffeler, 2017 #1971}"
Insecta,Mantodea,Mantidae,Aves,Apodiformes,Trochilidae,Panama,"{Nyffeler, 2017 #1971}","{Nyffeler, 2017 #1971}"
Insecta,Mantodea,Mantidae,Aves,Apodiformes,Trochilidae,United States,"{Nyffeler, 2017 #1971}","{Nyffeler, 2017 #1971}"
Insecta,Mantodea,Mantidae,Aves,Apodiformes,Trochilidae,United States,"{Nyffeler, 2017 #1971}","{Nyffeler, 2017 #1971}"
Insecta,Mantodea,Mantidae,Aves,Apodiformes,Trochilidae,United States,"{Nyffeler, 2017 #1971}","{Nyffeler, 2017 #1971}"
Insecta,Mantodea,Mantidae,Aves,Apodiformes,Trochilidae,United States,"{Nyffeler, 2017 #1971}","{Nyffeler, 2017 #1971}"
Insecta,Mantodea,Mantidae,Aves,Apodiformes,Trochilidae,United States,"{Nyffeler, 2017 #1971}","{Nyffeler, 2017 #1971}"
Insecta,Mantodea,Mantidae,Aves,Apodiformes,Trochilidae,United States,"{Nyffeler, 2017 #1971}","{Nyffeler, 2017 #1971}"
Insecta,Mantodea,Mantidae,Aves,Apodiformes,Trochilidae,United States,"{Nyffeler, 2017 #1971}","{Nyffeler, 2017 #1971}"
Insecta,Mantodea,Mantidae,Aves,Apodiformes,Trochilidae,United States,"{Nyffeler, 2017 #1971}","{Nyffeler, 2017 #1971}"
Insecta,Mantodea,Mantidae,Aves,Apodiformes,Trochilidae,United States,"{Nyffeler, 2017 #1971}","{Nyffeler, 2017 #1971}"
Insecta,Mantodea,Mantidae,Aves,Apodiformes,Trochilidae,United States,"{Nyffeler, 2017 #1971}","{Nyffeler, 2017 #1971}"
Insecta,Mantodea,Mantidae,Aves,Passeriformes,Certhiidae,United States,"{Prescott, 1968 #2089}","{Nyffeler, 2017 #1971}"
Insecta,Mantodea,Mantidae,Aves,Passeriformes,Certhiidae,unknown,"{Prescott, 1968 #2440}","{Mccormick, 1982 #648}"
Insecta,Mantodea,Mantidae,Aves,Passeriformes,Estrildidae,South Africa,"{Restall, 2010 #2526}","{Nyffeler, 2017 #1971}"
Insecta,Mantodea,Mantidae,Aves,Passeriformes,Meliphagidae,Australia,"{Ridpath, 1977 #2099}","{Nyffeler, 2017 #1971}"
Insecta,Mantodea,Mantidae,Aves,Passeriformes,Meliphagidae,Australia,"{Ridpath, 1977 #2099}","{Nyffeler, 2017 #1971}"
Insecta,Mantodea,Mantidae,Amphibia,Anura,Hylidae,Australia,"{Ridpath, 1977 #2099}","{Toledo, 2005 #336}"
Insecta,Mantodea,Mantidae,Amphibia,Anura,Hylidae,Australia,"{Ridpath, 1977 #2099}","{Toledo, 2005 #336}"
Insecta,Mantodea,Mantidae,Aves,Apodiformes,Trochilidae,United States,"{Ross, 1984 #2544}","{Nyffeler, 2017 #1971}"
Insecta,Mantodea,Mantidae,Aves,Apodiformes,Trochilidae,United States,"{Russell, 1978 #2541}","{Nyffeler, 2017 #1971}"
Insecta,Mantodea,Mantidae,Aves,Apodiformes,Trochilidae,United States,"{SCHWETMAN, 1995 #2545}","{Nyffeler, 2017 #1971}"
Insecta,Mantodea,Mantidae,Aves,Apodiformes,Trochilidae,United States,"{Shackelford, 2008 #2107}","{Nyffeler, 2017 #1971}"
Insecta,Mantodea,Mantidae,Aves,Apodiformes,Trochilidae,United States,"{Shackelford, 2008 #2107}","{Nyffeler, 2017 #1971}"
Insecta,Mantodea,Mantidae,Aves,Apodiformes,Trochilidae,United States,"{Shackelford, 2008 #2107}","{Nyffeler, 2017 #1971}"
Insecta,Mantodea,Mantidae,Aves,Apodiformes,Trochilidae,United States,"{Smith, 1992 #2102}","{Nyffeler, 2017 #1971}"
Insecta,Mantodea,Mantidae,Amphibia,Anura,Hylidae,Brazil,"{Toledo, 2005 #336}","{Toledo, 2005 #336}"
Insecta,Mantodea,Mantidae,Aves,Apodiformes,Trochilidae,Belize,"{Toops, 1992 #2529}","{Nyffeler, 2017 #1971}"
Insecta,Mantodea,Mantidae,Aves,Passeriformes,Phylloscopidae,Tunisia,"{TROUESSART, 1912 #2528}","{Nyffeler, 2017 #1971}"
Insecta,Mantodea,Mantidae,Aves,Passeriformes,Estrildidae,Congo,"{VRYDAGH, 1946 #2527}","{Nyffeler, 2017 #1971}"
Insecta,Mantodea,Mantidae,Aves,Apodiformes,Trochilidae,United States,"{WEINGARTNER, 1976 #2542}","{Nyffeler, 2017 #1971}"
Insecta,Mantodea,Mantidae,Reptilia,Squamata,Gekkonidae,Australia,"{Wright, 1982 #2415}","{Schalk, 2018 #1732}"
Insecta,Mantodea,Mantidae,Mammalia,‎Eulipotyphla,Soricidae,unknown,"{Ehrmann, 1992 #2575}",
Insecta,Mantodea,Mantidae,Amphibia,Anura,Unknown,Australia,"{Nash, 1962 #2576}",
Insecta,Mantodea,Mantidae,Mammalia,Rodentia,Muridae,United States,"{Nickle, 1981 #2577}",
Insecta,Mantodea,Mantidae,Reptilia,Squamata,Unknown,unknown,"{Kevan, 1985 #2578}",
Insecta,Mantodea,Mantidae,Amphibia,Urodela,Salamandridae,United States,"{Mebs, 2016 #2579}",
Insecta,Megaloptera,Corydalidae,Amphibia,Anura,Ascaphidae,United States,"{Jones, 1998 #2128}","{Toledo, 2005 #336}"
Insecta,Odonata,Aeshnidae,Actinopterygii,Cypriniformes,Cyprinidae,Canada,"{Berezina, 1960 #2457}","{Mccormick, 1982 #648}"
Insecta,Odonata,Aeshnidae,Amphibia,Anura,Hylidae,United States,"{Caldwell, 1980 #303}","{Mccormick, 1982 #648}"
Insecta,Odonata,Aeshnidae,Amphibia,Anura,Alsodidae,Argentina,"{Casanovas, 2006 #2207}",
Insecta,Odonata,Aeshnidae,Amphibia,Anura,Ranidae,United States,"{DeBenedictis, 1974 #2485}","{Mccormick, 1982 #648}"
Insecta,Odonata,Aeshnidae,Amphibia,Anura,Leptodactylidae,Brazil,"{Gambale, 2014 #1831}",
Insecta,Odonata,Aeshnidae,Amphibia,Anura,Ranidae,United States,"{Garwood, 2007 #2355}",
Insecta,Odonata,Aeshnidae,Amphibia,Unknown,Unknown,unknown,"{Kasimov, 1956 #2474}","{Mccormick, 1982 #648}"
Insecta,Odonata,Aeshnidae,Actinopterygii,Perciformes,Centrarchidae,United States,"{Kingsbury, 1937 #2473}","{Mccormick, 1982 #648}"
Insecta,Odonata,Aeshnidae,Amphibia,Anura,Hylidae,Brazil,"{Linares, 2016 #1656}",
Insecta,Odonata,Aeshnidae,Amphibia,Anura,Hylidae,Brazil,"{Linares, 2016 #1656}",
Insecta,Odonata,Aeshnidae,Amphibia,Anura,Hylidae,Brazil,"{Maciel, 2010 #2048}",
Insecta,Odonata,Aeshnidae,Actinopterygii,Gasterosteiformes,Gasterosteidae,Canada,"{Reist, 1980 #2488}","{Mccormick, 1982 #648}"
Insecta,Odonata,Aeshnidae,Actinopterygii,Cypriniformes,Cyprinidae,unknown,"{Shirgur, 1972 #2489}","{Mccormick, 1982 #648}"
Insecta,Odonata,Aeshnidae,Reptilia,Squamata,Gekkonidae,Philippines,"{Sy, 2014 #2360}",
Insecta,Odonata,Aeshnidae,Amphibia,Anura,Bufonidae,South Africa,"{Wager, 1986 #2468}","{Mccormick, 1982 #648}"
Insecta,Odonata,Cordulegastridae,Actinopterygii,Cypriniformes,Cyprinidae,Canada,"{Berezina, 1960 #2457}","{Mccormick, 1982 #648}"
Insecta,Odonata,Cordulegastridae,Actinopterygii,Salmoniformes,Salmonidae,unknown,"{Cockerell, 1919 #2449}","{Mccormick, 1982 #648}"
Insecta,Odonata,Libellulidae,Amphibia,Anura,Bufonidae,unknown,"{Heyer, 1975 #2476}","{Mccormick, 1982 #648}"
Insecta,Odonata,Libellulidae,Amphibia,Anura,Hylidae,unknown,"{Heyer, 1975 #2476}","{Mccormick, 1982 #648}"
Insecta,Odonata,Libellulidae,Amphibia,Anura,Leptodactylidae,unknown,"{Heyer, 1975 #2476}","{Mccormick, 1982 #648}"
Insecta,Odonata,Libellulidae,Amphibia,Anura,Hylidae,Costa Rica,"{Heyer, 1976 #2475}","{Mccormick, 1982 #648}"
Insecta,Odonata,Libellulidae,Amphibia,Anura,Leptodactylidae,Costa Rica,"{Heyer, 1976 #2475}","{Mccormick, 1982 #648}"
Insecta,Odonata,Libellulidae,Actinopterygii,Cypriniformes,Cyprinidae,unknown,"{Shirgur, 1972 #2489}","{Mccormick, 1982 #648}"
Insecta,Odonata,Libellulidae,Actinopterygii,Cypriniformes,Cyprinidae,unknown,"{Shirgur, 1972 #2489}","{Mccormick, 1982 #648}"
Insecta,Odonata,Unknown,Amphibia,Anura,Hylidae,Ecuador,"{Heyer, 1973 #2477}","{Mccormick, 1982 #648}"
Insecta,Odonata,Unknown,Aves,Apodiformes,Trochilidae,United States,"{Hofslund, 1977 #1993}",
Insecta,Odonata,Unknown,Amphibia,Anura,Hylidae,Brazil,"{Ivan, 1993 #1805}",
Insecta,Odonata,Unknown,Amphibia,Anura,Bufonidae,unknown,"{Pomeroy, 1982 #2455}","{Mccormick, 1982 #648}"
Insecta,Odonata,Unknown,Amphibia,Anura,Scaphiopodidae,United States,"{Pomeroy, 1982 #2455}","{Mccormick, 1982 #648}"
Insecta,Orthoptera,Tettigoniidae,Aves,Passeriformes,Ploceidae,Botswana,"{Cheke, 2003 #402}",
Insecta,Orthoptera,Tettigoniidae,Reptilia,Squamata,Dactyloidae,Costa Rica,"{Hawley, 2007 #2417}","{Schalk, 2018 #1732}"
Insecta,Trichoptera,Limnephilidae,Amphibia,Anura,Ranidae,United States,"{Rubbo, 2006 #253}",
Insecta,Trichoptera,Phryganeidae,Amphibia,Urodela,Ambystomatidae,United States,"{Murphy, 1961 #2012}","{Jobe, 2019 #1661}"
Insecta,Trichoptera,Polycentropodidae,Actinopterygii,Salmoniformes,Salmonidae,unknown,"{Townsend, 1978 #2491}","{Mccormick, 1982 #648}"
Malacostraca,Decapoda,Cambaridae,Amphibia,Urodela,Plethodontidae,United States,"{Franklin, 2000 #2011}","{Jobe, 2019 #1661}"
Malacostraca,Decapoda,Cambaridae,Amphibia,Urodela,Plethodontidae,United States,"{Owen, 2016 #2014}","{Jobe, 2019 #1661}"
Malacostraca,Decapoda,Cambaridae,Reptilia,Squamata,Colubridae,United States,"{Weaver, 2004 #2235}","{Schalk, 2018 #1732}"
Malacostraca,Decapoda,Coenobitidae,Aves,Charadriiformes,Laridae,unknown,"{Helfman, 1979 #2486}","{Mccormick, 1982 #648}"
Malacostraca,Decapoda,Coenobitidae,Amphibia,Anura,Unknown,unknown,"{Helfman, 1979 #2486}","{Mccormick, 1982 #648}"
Malacostraca,Decapoda,Coenobitidae,Aves,Charadriiformes,Unknown,unknown,"{Pitman, 1957 #2467}","{Mccormick, 1982 #648}"
Malacostraca,Decapoda,Coenobitidae,Aves,Charadriiformes,Unknown,unknown,"{Pitman, 1957 #2467}","{Mccormick, 1982 #648}"
Malacostraca,Decapoda,Coenobitidae,Reptilia,Squamata,Dactyloidae,Colombia,"{Wolda, 1975 #2466}","{Mccormick, 1982 #648}"
Malacostraca,Decapoda,Coenobitidae,Aves,Columbiformes,Columbidae,Brazil,"{Calegaro-Marques, 1992 #1940}","{Menezes, 2017 #1824}"
Malacostraca,Decapoda,Coenobitidae,Reptilia,Squamata,Colubridae,Guam,"{Lardner, 2011 #2227}",
Malacostraca,Decapoda,Coenobitidae,Aves,Anseriformes,Anatidae,puerto rico,"{Meier, 1989 #1942}","{Menezes, 2017 #1824}"
Malacostraca,Decapoda,Coenobitidae,Aves,Columbiformes,Columbidae,puerto rico,"{Rivera-Milán, 2002 #1941}","{Menezes, 2017 #1824}"
Malacostraca,Decapoda,Coenobitidae,Aves,Phaethontiformes,Phaethontidae,puerto rico,"{Schaffner, 1991 #1944}","{Menezes, 2017 #1824}"
Malacostraca,Decapoda,Gecarcinidae,Aves,Suliformes,Sulidae,Carribean,"{Atkinson, 1985 #1947}","{Menezes, 2017 #1824}"
Malacostraca,Decapoda,Gecarcinidae,Aves,Charadriiformes,Laridae,puerto rico,"{Burger, 1988 #1948}","{Menezes, 2017 #1824}"
Malacostraca,Decapoda,Gecarcinidae,Aves,Charadriiformes,Laridae,puerto rico,"{Burger, 1989 #1949}","{Menezes, 2017 #1824}"
Malacostraca,Decapoda,Gecarcinidae,Reptilia,Testudines,Cheloniidae,Brazil,"{De Carvalho, 2018 #2061}",
Malacostraca,Decapoda,Gecarcinidae,Reptilia,Squamata,Colubridae,Sri Lanka,"{De Zoysa, 2015 #1816}",
Malacostraca,Decapoda,Gecarcinidae,Reptilia,Squamata,Viperidae,Costa Rica,"{Dehling, 2008 #2370}",
Malacostraca,Decapoda,Gecarcinidae,Aves,Psittaciformes,Psittacidae,Bahamas,"{Gnam, 1986 #2547}","{Menezes, 2017 #1824}"
Malacostraca,Decapoda,Gecarcinidae,Aves,Psittaciformes,Psittacidae,Bahamas,"{Gnam, 1990 #2548}","{Menezes, 2017 #1824}"
Malacostraca,Decapoda,Gecarcinidae,Aves,Psittaciformes,Psittacidae,Bahamas,"{Gnam, 1992 #1946}","{Menezes, 2017 #1824}"
Malacostraca,Decapoda,Gecarcinidae,Aves,Charadriiformes,Laridae,Brazil,"{Hazin, 2006 #1951}","{Menezes, 2017 #1824}"
Malacostraca,Decapoda,Gecarcinidae,Aves,Unknown,Unknown,Colombia,"{López-Victoria, 2006 #1954}","{Menezes, 2017 #1824}"
Malacostraca,Decapoda,Gecarcinidae,Aves,Columbiformes,Columbidae,puerto rico,"{Rivera-Milán, 2002 #1941}","{Menezes, 2017 #1824}"
Malacostraca,Decapoda,Gecarcinidae,Aves,Phaethontiformes,Phaethontidae,puerto rico,"{Schaffner, 1991 #1944}","{Menezes, 2017 #1824}"
Malacostraca,Decapoda,Gecarcinidae,Aves,Charadriiformes,Laridae,Brazil,"{Schulz Neto, 1998 #1950}","{Menezes, 2017 #1824}"
Malacostraca,Decapoda,Gecarcinidae,Aves,Charadriiformes,Laridae,Brazil,"{Schulz Neto, 1998 #1950}","{Menezes, 2017 #1824}"
Malacostraca,Decapoda,Gecarcinidae,Aves,Suliformes,Sulidae,Brazil,"{Schulz Neto, 1998 #1950}","{Menezes, 2017 #1824}"
Malacostraca,Decapoda,Gecarcinidae,Amphibia,Anura,Microhylidae,Philippines,"{Sy, 2015 #2372}",
Malacostraca,Decapoda,Gecarcinucidae,Reptilia,Squamata,Pythonidae,India,"{Vyas, 2015 #1919}",
Malacostraca,Decapoda,Grapsidae,Amphibia,Anura,Leptodactylidae,Brazil,"{Andrade, 2012 #1677}",
Malacostraca,Decapoda,Grapsidae,Reptilia,Squamata,Diplodactylidae,New Zealand,"{Bell, 2017 #1901}",
Malacostraca,Decapoda,Grapsidae,Aves,Sphenisciformes,Spheniscidae,Ecuador,"{Boersma, 1976 #1945}","{Menezes, 2017 #1824}"
Malacostraca,Decapoda,Grapsidae,Amphibia,Anura,Dendrobatidae,Guyana,"{Bourne, 2001 #2230}",
Malacostraca,Decapoda,Grapsidae,Amphibia,Anura,Dendrobatidae,Guyana,"{Bourne, 2001 #2230}",
Malacostraca,Decapoda,Grapsidae,Amphibia,Anura,Hylidae,Australia,"{Pyke, 2013 #1900}",
Malacostraca,Decapoda,Grapsidae,Amphibia,Anura,Hylidae,Australia,"{Pyke, 2013 #1900}",
Malacostraca,Decapoda,Grapsidae,Aves,Columbiformes,Columbidae,puerto rico,"{Rivera-Milán, 2002 #1941}","{Menezes, 2017 #1824}"
Malacostraca,Decapoda,Grapsidae,Aves,Phaethontiformes,Phaethontidae,puerto rico,"{Schaffner, 1991 #1944}","{Menezes, 2017 #1824}"
Malacostraca,Decapoda,Hippidae,Reptilia,Testudines,Cheloniidae,United States,"{Ernst, 1972 #2507}","{Mccormick, 1982 #648}"
Malacostraca,Decapoda,Hippidae,Reptilia,Testudines,Cheloniidae,United States,"{Ernst, 1972 #2507}","{Mccormick, 1982 #648}"
Malacostraca,Decapoda,Hippidae,Reptilia,Testudines,Cheloniidae,United States,"{Ernst, 1972 #2507}","{Mccormick, 1982 #648}"
Malacostraca,Decapoda,Hippidae,Amphibia,Anura,Unknown,South Africa,"{Wager, 1986 #2468}","{Mccormick, 1982 #648}"
Malacostraca,Decapoda,Ocypodidae,Reptilia,Testudines,Cheloniidae,Australia,"{Blamires, 1999 #2232}",
Malacostraca,Decapoda,Ocypodidae,Reptilia,Testudines,Cheloniidae,Australia,"{Bustard, 1966 #2487}","{Mccormick, 1982 #648}"
Malacostraca,Decapoda,Ocypodidae,Aves,Passeriformes,Muscicapidae,South Africa,"{Comins, 1961 #2465}","{Mccormick, 1982 #648}"
Malacostraca,Decapoda,Ocypodidae,Reptilia,Squamata,Viperidae,United States,"{Cross, 2002 #2226}","{Schalk, 2018 #1732}"
Malacostraca,Decapoda,Ocypodidae,Reptilia,Squamata,Elapidae,New Caledonia,"{Cunkelman, 2006 #2231}",
Malacostraca,Decapoda,Ocypodidae,Reptilia,Testudines,Cheloniidae,Micronesia,"{Kolinski, 1994 #2228}",
Malacostraca,Decapoda,Ocypodidae,Reptilia,Testudines,Cheloniidae,Cape Verde,"{Marco, 2015 #2060}",
Malacostraca,Decapoda,Ocypodidae,Reptilia,Squamata,Tropiduridae,Brazil,"{Rocha, 1998 #2197}",
Malacostraca,Decapoda,Ocypodidae,Aves,Charadriiformes,Haematopodidae,United States,"{Sabine, 2005 #1955}","{Menezes, 2017 #1824}"
Malacostraca,Decapoda,Ocypodidae,Reptilia,Squamata,Teiidae,Brazil,"{Segadilha, 2016 #2367}",
Malacostraca,Decapoda,Ocypodidae,Reptilia,Testudines,Dermochelyidae,Costa Rica,"{Tomillo, 2010 #2153}",
Malacostraca,Decapoda,Paguridae,Reptilia,Testudines,Cheloniidae,Micronesia,"{Kolinski, 1994 #2228}",
Malacostraca,Decapoda,Penaeidae,Actinopterygii,Unknown,Unknown,Philippines,"{Marte, 1980 #2464}","{Mccormick, 1982 #648}"
Malacostraca,Decapoda,Portunidae,Reptilia,Testudines,Kinosternidae,United States,"{Hendrickson, 1958 #2478}","{Mccormick, 1982 #648}"
Malacostraca,Decapoda,Portunidae,Reptilia,Squamata,Colubridae,United States,"{Mohrman, 2008 #2369}",
Malacostraca,Decapoda,Portunidae,Reptilia,Squamata,Elapidae,Thailand,"{Voris, 1995 #2058}",
Malacostraca,Decapoda,Potamidae,Amphibia,Anura,Dicroglossidae,Taiwan,"{Tsuji, 2005 #2234}",
Malacostraca,Decapoda,Potamonautidae,Amphibia,Anura,Pipidae,South Africa,"{Gutsche, 2007 #2371}",
Malacostraca,Decapoda,Potamonautidae,Amphibia,Anura,Megophryidae,Philippines,"{Lorenzo, 2017 #2366}",
Malacostraca,Decapoda,Potamonautidae,Reptilia,Squamata,Homalopsidae,Malaysia,"{Low, 2017 #2365}",
Malacostraca,Decapoda,Potamonautidae,Amphibia,Anura,Mantellidae,Madagascar,"{Rosa, 2014 #1762}",
Malacostraca,Decapoda,Potamonautidae,Amphibia,Anura,Conrauidae,Guinea,"{Schäfer, 2019 #1857}",
Malacostraca,Decapoda,Potamonautidae,Amphibia,Anura,Conrauidae,Guinea,"{Schäfer, 2019 #1857}",
Malacostraca,Decapoda,Pseudothelphusidae,Amphibia,Anura,Eleutherodactylidae,Cuba,"{Fong G., 2012 #2333}",
Malacostraca,Decapoda,Pseudothelphusidae,Amphibia,Anura,Eleutherodactylidae,Cuba,"{Fong G., 2012 #2333}",
Malacostraca,Decapoda,Pseudothelphusidae,Amphibia,Anura,Aromobatidae,Venezuela,"{López-Sánchez,  #1667}",
Malacostraca,Decapoda,Pseudothelphusidae,Reptilia,Squamata,Colubridae,Trinidad and Tobago,"{Maitland, 2003 #1814}",
Malacostraca,Decapoda,Pseudothelphusidae,Reptilia,Squamata,Colubridae,Trinidad and Tobago,"{Maitland, 2003 #1814}",
Malacostraca,Decapoda,Pseudothelphusidae,Reptilia,Squamata,Colubridae,Trinidad and Tobago,"{Maitland, 2003 #1814}",
Malacostraca,Decapoda,Pseudothelphusidae,Reptilia,Squamata,Colubridae,Trinidad and Tobago,"{Maitland, 2003 #1814}",
Malacostraca,Decapoda,Pseudothelphusidae,Reptilia,Squamata,Colubridae,Trinidad and Tobago,"{Maitland, 2003 #1814}",
Malacostraca,Decapoda,Pseudothelphusidae,Reptilia,Squamata,Colubridae,Trinidad and Tobago,"{Maitland, 2003 #1814}",
Malacostraca,Decapoda,Pseudothelphusidae,Amphibia,Anura,Leiuperidae,Panama,"{Ryan, 1982 #2140}","{Toledo, 2005 #336}"
Malacostraca,Decapoda,Pseudothelphusidae,Amphibia,Anura,Hylidae,Trinidad and Tobago,"{Townsend, 2005 #2233}",
Malacostraca,Decapoda,Pseudothelphusidae,Amphibia,Anura,Hylidae,Costa Rica,"{Warrington, 2012 #2374}",
Malacostraca,Decapoda,Pseudothelphusidae,Reptilia,Squamata,Dactyloidae,Costa Rica,"{Wehrtmann, 2019 #1644}",
Malacostraca,Decapoda,Pseudothelphusidae,Amphibia,Anura,Hylidae,Costa Rica,"{Wehrtmann, 2019 #1644}",
Malacostraca,Decapoda,Sesarmidae,Amphibia,Anura,Dendrobatidae,Panama,"{Gray, 2000 #1906}",
Malacostraca,Decapoda,Trichodactylidae,Amphibia,Anura,Hylidae,Brazil,"{Caldart, 2011 #1682}",
Malacostraca,Decapoda,Trichodactylidae,Amphibia,Anura,Leptodactylidae,Brazil,"{De P. Affonso, 2011 #1646}",
Malacostraca,Decapoda,Trichodactylidae,Amphibia,Anura,Hylidae,Brazil,"{Marques, 2013 #2373}",
Malacostraca,Decapoda,Trichodactylidae,Reptilia,Squamata,Colubridae,Brazil,"{Tavares-Pinheiro, 2018 #2368}",
Malacostraca,Decapoda,Unknown,Amphibia,Anura,Unknown,Sri Lanka,"{de Silva, 1997 #1903}",
Malacostraca,Decapoda,Unknown,Aves,Anseriformes,Anatidae,virgin islands,"{Nellis, 1984 #1943}","{Menezes, 2017 #1824}"
Malacostraca,Isopoda,Asellidae,Amphibia,Urodela,Ambystomatidae,United States,"{Hutton, 2018. #2005}","{Jobe, 2019 #1661}"
Malacostraca,Stomatopoda,Lysiosquillidae,Actinopterygii,Unknown,Unknown,unknown,"{Kaestner, 1970 #2492}","{Mccormick, 1982 #648}"
Malacostraca,Stomatopoda,Lysiosquillidae,Actinopterygii,Unknown,Unknown,unknown,"{Kaestner, 1970 #2492}","{Mccormick, 1982 #648}"
Ostracoda,Myodocopida,Cypridinidae,Actinopterygii,Unknown,Unknown,unknown,"{Barnes, 1974 #2493}","{Mccormick, 1982 #648}"
Ostracoda,Myodocopida,Cypridinidae,Actinopterygii,Unknown,Unknown,unknown,"{Kaestner, 1970 #2492}","{Mccormick, 1982 #648}"
